# Supplementary material for: Divergent transformation of C,N-cyclic-N′-acyl azomethine imines by reaction with diazo compounds
Source: Royal Society of Chemistry journal article supplement (doi:10.1039/d3ob01165h), 2023-01-01

## Supporting Information

### Divergent Transformation of *C,N*-Cyclic-*N'*-acyl Azomethine Imines by Reaction with Diazo Compounds

Haruki Ohno, Ryosuke Takahashi, Takuya Suga, Takahiro Soeta and Yutaka Ukaji\*

*Division of Material Chemistry, Graduate School of Natural Science and Technology,*

*Kanazawa University, Kakuma, Kanazawa, Ishikawa 920-1192, Japan*

E-mail: ukaji@staff.kanazawa-u.ac.jp

#### Table of Contents

|                                                                                                                                    |     |
|------------------------------------------------------------------------------------------------------------------------------------|-----|
| 1. General information                                                                                                             | S2  |
| 2. Procedure for the reaction with ethyl diazoacetate (Reaction A) and analytical data of <b>4</b>                                 | S3  |
| 3. Procedure for the reaction with trimethylsilyldiazomethane (Reaction B) and analytical data of <b>5</b>                         | S6  |
| 4. Procedure for the conversion of <b>4a</b> to <b>6</b> and analytical data of <b>6</b>                                           | S8  |
| 5. ORTEPs of <b>4a</b> and <b>6</b>                                                                                                | S9  |
| 6. References                                                                                                                      | S15 |
| 7. NMR Spectra of compounds                                                                                                        |     |
| 1) <sup>1</sup> H and <sup>13</sup> C NMR spectra of $\alpha$ -diazoacetate moiety-introduced tetrahydroisoquinolines <b>4a-4g</b> | S16 |
| 2) <sup>1</sup> H and <sup>13</sup> C NMR spectra of 3-benzazepine derivatives <b>5a-5g</b>                                        | S30 |
| 3) <sup>1</sup> H and <sup>13</sup> C NMR spectra of <b>6</b>                                                                      | S44 |

## 1. General information

NMR spectra were recorded on JEOL ECS-400 (400 MHz for  $^1\text{H}$ , 100 MHz for  $^{13}\text{C}$ ) using  $\text{CDCl}_3$  as a solvent. Tetramethylsilane ( $\delta = 0$  ppm) for  $^1\text{H}$  NMR and  $\text{CDCl}_3$  ( $\delta = 77.0$  ppm) for  $^{13}\text{C}$  NMR were used as internal standards. IR spectra were acquired on a JASCO FT/IR-230 spectrometer. Melting points were determined on a micromelting apparatus (AS-ONE ATM-02) and are uncorrected. Mass spectra were recorded on Bruker Daltonics micrOTOF II-KA1 (ESI). X-ray crystallography was performed on a Bruker SMART APEX II (with  $\text{Cu K}\alpha$  radiation). Purification of the products was performed by column chromatography on silica gel (Kanto Silica gel 60N, spherical, neutral or Fuji Silysia CHROMATOREX PSQ60B). Dehydrated solvents were purchased for the reactions and used without further desiccation.

*C,N*-Cyclic *N'*-acyl azomethine imines **1** were prepared according to the reported procedure.<sup>1</sup> Ethyl diazoacetate (containing  $\text{CH}_2\text{Cl}_2$ ) and trimethylsilyldiazomethane ( $\text{Et}_2\text{O}$  solution) were purchased from Sigma-Aldrich and Oakwood Chemical, respectively, and used as they stand.

## 2. Procedure for the reaction with ethyl diazoacetate (Reaction A) and analytical data of 4

**Ethyl 2-(2-Benzamido-1,2,3,4-tetrahydroisoquinolin-1-yl)-2-diazoacetate (4a):**<sup>2</sup> To a mixture of benzoyl(3,4-dihydroisoquinolin-2-ium-2-yl)amide (**1a**) (120 mg, 0.48 mmol) in benzene (12 mL) was added ethyl diazoacetate (328 mg, 85% with CH<sub>2</sub>Cl<sub>2</sub>, 2.49 mmol) and the mixture was heated at 60 °C (oil bath temperature) for 3 d. After being cooled to room temperature, xylene (10 mL) was added and the solvent and unreacted ethyl diazoacetate were removed under reduced pressure. The resulted crude products were purified by silica gel column chromatography (hexane/AcOEt = 3/1) to give **4a** (156 mg, 89% yield) as a solid. *R*<sub>f</sub> = 0.6 (hexane/AcOEt = 1/1, v/v). <sup>1</sup>H NMR (CDCl<sub>3</sub>, 400 MHz): δ 7.78 (d, *J* = 7.3 Hz, 2H), 7.53–7.40 (m, 4H), 7.24–7.14 (m, 4H), 5.19 (s, 1H), 4.17 (q, *J* = 7.1 Hz, 2H), 3.48–3.42 (m, 1H), 3.38–3.24 (m, 2H), 2.93 (d, *J* = 15.6 Hz, 1H), 1.17 (t, *J* = 7.1 Hz, 3H). <sup>13</sup>C{<sup>1</sup>H} NMR (CDCl<sub>3</sub>, 100 MHz): δ 167.7, 165.7, 134.7, 133.5, 132.3, 131.5, 128.8, 128.5, 127.6, 127.1, 126.6, 62.5, 61.2, 60.2, 52.2, 29.1, 14.3. CCDC-2129155 contains the supplementary crystallographic data for **4a**.

In a similar manner, **4b–4g** were obtained from the corresponding *C,N*-cyclic-*N'*-acyl azomethine imines **1b–1g**.

**Ethyl 2-Diazo-2-(2-(4-methylbenzamido)-1,2,3,4-tetrahydroisoquinolin-1-yl)acetate (4b):** The reaction using **1b** (77 mg, 0.29 mmol) was carried out for 3 d. The compound **4b** (88 mg, 79% yield) was obtained as a solid after purification by silica gel column chromatography (hexane/AcOEt = 10/1, 6/1, 4/1 and then 3/1). *R*<sub>f</sub> = 0.7 (hexane/AcOEt = 1/1, v/v). Mp. 137–139 °C (CHCl<sub>3</sub>/hexane). <sup>1</sup>H NMR (CDCl<sub>3</sub>, 400 MHz): δ 7.68 (d, *J* = 8.2 Hz, 2H), 7.56 (s, 1H), 7.28–7.12 (m, 6H), 5.18 (s, 1H), 4.16 (q, *J* = 6.9 Hz, 2H), 3.48–3.42 (m, 1H), 3.38–3.22 (m, 2H), 2.90 (d, *J* = 15.6 Hz, 1H), 2.37 (s, 3H), 1.17 (t, *J* = 6.9 Hz, 3H). <sup>13</sup>C{<sup>1</sup>H} NMR (CDCl<sub>3</sub>, 100 MHz): δ 167.7, 165.7, 141.9, 134.7, 132.3, 130.7, 129.1, 128.8, 127.6, 127.1, 126.5, 62.5, 61.1, 60.2, 52.3, 29.2, 21.4, 14.3; one signal overlaps. IR (KBr) 3250, 2979, 2929, 2105, 1692, 1648, 1542, 1374, 1292, 1260, 1101, 941, 914, 744 cm<sup>-1</sup>. HRMS (ESI) *m/z*: [M+Na]<sup>+</sup> Calcd for C<sub>21</sub>H<sub>22</sub>N<sub>4</sub>O<sub>3</sub>Na 401.1590; Found 401.1601.

**Ethyl 2-(2-(4-Chlorobenzamido)-1,2,3,4-tetrahydroisoquinolin-1-yl)-2-diazoacetate (4c):** The reaction using **1c** (82 mg, 0.29 mmol) was carried out for 2 d. The compound **4c** (102 mg, 88% yield) was obtained as a solid after purification by silica gel column chromatography (hexane/AcOEt = 10/1, 6/1 and then 3/1). *R*<sub>f</sub> = 0.8 (hexane/AcOEt = 1/1, v/v). Mp. 147–148 °C (CHCl<sub>3</sub>/hexane). <sup>1</sup>H NMR (CDCl<sub>3</sub>, 400 MHz): δ 7.75 (s, 1H), 7.74 (d, *J* = 8.2 Hz, 2H), 7.36 (d, *J* = 8.2 Hz, 2H), 7.24–7.11 (m, 4H), 5.18 (s, 1H), 4.17 (q, *J* = 7.1 Hz, 2H), 3.42 (dd, *J* = 9.2, 4.2 Hz, 1H), 3.36–3.21 (m, 2H), 2.91 (dd, *J* = 12.4, 4.2 Hz, 1H), 1.18 (t, *J* = 7.1 Hz, 3H). <sup>13</sup>C{<sup>1</sup>H} NMR (CDCl<sub>3</sub>, 100 MHz): δ 167.8, 164.6, 137.7, 134.6, 132.0, 131.9, 128.9, 128.7, 128.6, 127.7, 127.0, 126.6, 62.4, 61.2, 60.1, 52.1, 29.1, 14.3. IR (KBr) 3379, 2972, 2102, 1682, 1656, 1483, 1372, 1300, 1260, 1103, 1014, 845, 737 cm<sup>-1</sup>. HRMS (ESI) *m/z*: [M+Na]<sup>+</sup> Calcd for C<sub>20</sub>H<sub>19</sub>N<sub>4</sub>O<sub>3</sub>ClNa 421.1043; Found 421.1014.

**Ethyl 2-(2-Benzamido-5-methyl-1,2,3,4-tetrahydroisoquinolin-1-yl)-2-diazoacetate (4d):** The reaction using **1d** (75 mg, 0.28 mmol) was carried out at 60 °C for 2 d and at 80 °C for 2 d. The compound **4d** (58 mg, 54% yield) was obtained as a solid after purification by silica gel column chromatography (hexane/AcOEt = 10/1, 6/1, 4/1, 3/1 and then 2/1).  $R_f = 0.7$  (hexane/AcOEt = 1/1, v/v). Mp. 159–161 °C (CHCl<sub>3</sub>/hexane). <sup>1</sup>H NMR (CDCl<sub>3</sub>, 400 MHz): δ 7.79 (d,  $J = 7.3$  Hz, 2H), 7.58 (s, 1H), 7.49 (t,  $J = 7.3$  Hz, 1H), 7.45–7.39 (m, 2H), 7.17–7.03 (m, 3H), 5.17 (s, 1H), 4.17 (q,  $J = 6.9$  Hz, 2H), 3.54–3.45 (m, 1H), 3.31–3.22 (m, 1H), 3.14–3.03 (m, 1H), 2.88–2.78 (m, 1H), 2.24 (s, 3H), 1.17 (t,  $J = 6.9$  Hz, 3H). <sup>13</sup>C{<sup>1</sup>H} NMR (CDCl<sub>3</sub>, 100 MHz): δ 167.8, 165.6, 136.5, 133.5, 133.2, 132.1, 131.5, 129.0, 128.5, 127.1, 126.4, 124.8, 62.8, 61.2, 60.3, 52.0, 26.9, 19.3, 14.3. IR (KBr) 3364, 2960, 2937, 2855, 2092, 1684, 1656, 1515, 1379, 1294, 1106, 1031, 762, 714, 691 cm<sup>-1</sup>. HRMS (ESI)  $m/z$ : [M+Na]<sup>+</sup> Calcd for C<sub>21</sub>H<sub>22</sub>N<sub>4</sub>O<sub>3</sub>Na 401.1590; Found 401.1594.

**Ethyl 2-(2-Benzamido-7-methyl-1,2,3,4-tetrahydroisoquinolin-1-yl)-2-diazoacetate (4e):** The reaction using **1e** (39 mg, 0.15 mmol) was carried out for 3 d. The compound **4e** (43 mg, 76% yield) was obtained as a solid after purification by silica gel column chromatography (hexane/AcOEt = 10/1, 6/1 and then 3/1).  $R_f = 0.7$  (hexane/AcOEt = 1/1, v/v). Mp. 147–149 °C (CHCl<sub>3</sub>/hexane). <sup>1</sup>H NMR (CDCl<sub>3</sub>, 400 MHz): δ 7.78 (d,  $J = 6.9$  Hz, 2H), 7.53–7.38 (m, 3H), 7.48 (s, 1H), 7.06–7.00 (m, 2H), 6.99 (s, 1H), 5.13 (s, 1H), 4.23–4.13 (m, 2H), 3.43 (dd,  $J = 8.7, 4.6$  Hz, 1H), 3.35–3.21 (m, 2H), 2.92–2.85 (m, 1H), 2.32 (s, 3H), 1.18 (t,  $J = 7.3$  Hz, 3H). <sup>13</sup>C{<sup>1</sup>H} NMR (CDCl<sub>3</sub>, 100 MHz): δ 167.8, 165.7, 136.2, 133.6, 132.0, 131.6, 131.6, 128.7, 128.6, 128.5, 127.4, 127.1, 62.6, 61.2, 60.3, 52.4, 28.7, 21.1, 14.3. IR (KBr) 3371, 2970, 2928, 2093, 1681, 1656, 1519, 1487, 1373, 1301, 1259, 1103, 802, 711, 693 cm<sup>-1</sup>. HRMS (ESI)  $m/z$ : [M+Na]<sup>+</sup> Calcd for C<sub>21</sub>H<sub>22</sub>N<sub>4</sub>O<sub>3</sub>Na 401.1590; Found 401.1602.

**Ethyl 2-(2-Benzamido-6-methoxy-1,2,3,4-tetrahydroisoquinolin-1-yl)-2-diazoacetate (4f):** The reaction using **1f** (63 mg, 0.23 mmol) was carried out for 2 d. The compound **4f** (70 mg, 78% yield) was obtained as a solid after purification by silica gel column chromatography (hexane/AcOEt = 6/1, 3/1 and then 2/1).  $R_f = 0.4$  (hexane/AcOEt = 1/1, v/v). Mp. 147–148 °C (CHCl<sub>3</sub>/hexane). <sup>1</sup>H NMR (CDCl<sub>3</sub>, 400 MHz): δ 7.78 (d,  $J = 7.3$  Hz, 2H), 7.57 (s, 1H), 7.49 (t,  $J = 7.3$  Hz, 1H), 7.45–7.38 (m, 2H), 7.11 (d,  $J = 8.7$  Hz, 1H), 6.77 (dd,  $J = 8.7, 2.3$  Hz, 1H), 6.66 (d,  $J = 2.3$  Hz, 1H), 5.12 (s, 1H), 4.16 (q,  $J = 7.0$  Hz, 2H), 3.79 (s, 3H), 3.44 (dd,  $J = 9.2, 5.0$  Hz, 1H), 3.35–3.20 (m, 2H), 2.92–2.84 (m, 1H), 1.17 (t,  $J = 7.0$  Hz, 3H). <sup>13</sup>C{<sup>1</sup>H} NMR (CDCl<sub>3</sub>, 100 MHz): δ 167.7, 165.6, 158.8, 136.1, 133.5, 131.5, 128.5, 128.2, 127.1, 124.3, 113.1, 113.0, 62.2, 61.1, 60.2, 55.2, 52.2, 29.4, 14.3. IR (KBr) 3369, 2968, 2931, 2091, 1679, 1656, 1522, 1505, 1372, 1261, 1110, 794, 704, 691 cm<sup>-1</sup>. HRMS (ESI)  $m/z$ : [M+Na]<sup>+</sup> Calcd for C<sub>21</sub>H<sub>22</sub>N<sub>4</sub>O<sub>4</sub>Na 417.1539; Found 417.1530.

**Ethyl 2-(2-Benzamido-7-bromo-1,2,3,4-tetrahydroisoquinolin-1-yl)-2-diazoacetate (4g):** The reaction using **1g** (75 mg, 0.23 mmol) was carried out for 2 d. The compound **4g** (74 mg, 74% yield) was obtained as a solid after purification by silica gel column chromatography (hexane/AcOEt = 9/1, 6/1, 3/1 and then 2/1).  $R_f = 0.7$  (hexane/AcOEt = 1/1, v/v). Mp. 150–152 °C (CHCl<sub>3</sub>/hexane). <sup>1</sup>H

NMR (CDCl<sub>3</sub>, 400 MHz):  $\delta$  7.77 (d,  $J$  = 7.3 Hz, 2H), 7.63 (s, 1H), 7.49 (t,  $J$  = 7.3 Hz, 1H), 7.40 (t,  $J$  = 7.3 Hz, 2H), 7.35–7.31 (m, 2H), 7.03 (d,  $J$  = 8.7 Hz, 1H), 5.17 (s, 1H), 4.16 (q,  $J$  = 7.3 Hz, 2H), 3.48–3.40 (m, 1H), 3.34–3.18 (m, 2H), 2.88–2.80 (m, 1H), 1.17 (t,  $J$  = 7.3 Hz, 3H). <sup>13</sup>C{<sup>1</sup>H} NMR (CDCl<sub>3</sub>, 100 MHz):  $\delta$  167.4, 165.8, 134.7, 133.8, 133.4, 131.7, 130.8, 130.5, 129.8, 128.5, 127.1, 120.1, 62.0, 61.3, 60.0, 52.0, 28.8, 14.3. IR (KBr) 3369, 2974, 2090, 1685, 1655, 1520, 1487, 1373, 1305, 1257, 1102, 797, 711, 692 cm<sup>-1</sup>. HRMS (ESI)  $m/z$ : [M+Na]<sup>+</sup> Calcd for C<sub>20</sub>H<sub>19</sub>N<sub>4</sub>O<sub>3</sub><sup>79</sup>Br 465.0538; Found 465.0532. Calcd for C<sub>20</sub>H<sub>19</sub>N<sub>4</sub>O<sub>3</sub><sup>81</sup>Br 467.0518; Found 467.0516.

### 3. Procedure for the reaction with trimethylsilyldiazomethane (Reaction B) and analytical data of 5

**3-Phenyl-6,7-dihydro-1*H*-1,5-methanobenzo[*g*][1,3,4]oxadiazonine (5a):**<sup>3</sup> To a mixture of *C,N*-cyclic-*N'*-acyl azomethine imine **1a** (76 mg, 0.30 mmol) in butyronitrile (3 mL) and MeOH (0.3 mL) was added trimethylsilyldiazomethane (0.45 mL, 2 M solution in Et<sub>2</sub>O, 0.90 mmol) and the mixture was stirred at rt for 1 d. After addition of acetic acid (0.06 mL) followed by toluene (3 mL) to the reaction mixture, the solvent was removed under reduced pressure. The resulted crude products were purified by silica gel column chromatography (hexane/AcOEt = 10/1, 8/1, 5/1, 2/1 and then 1/1) to give **5a** as a solid (52 mg, 65% yield). <sup>1</sup>H NMR (CDCl<sub>3</sub>, 400 MHz): δ 7.89 (dd, *J* = 8.0, 1.6 Hz, 2H), 7.38–7.28 (m, 4H), 7.20–7.16 (m, 2H), 7.08–7.06 (m, 1H), 5.39 (d, *J* = 2.3 Hz, 1H), 3.80–3.72 (m, 1H), 3.67–3.58 (m, 2H), 3.48–3.39 (m, 2H), 2.56–2.47 (m, 1H). <sup>13</sup>C{<sup>1</sup>H} NMR (CDCl<sub>3</sub>, 100 MHz): δ 155.5, 139.9, 138.0, 132.4, 131.4, 131.2, 129.9, 128.8, 127.9, 126.5, 126.0, 78.5, 54.0, 49.9, 33.6.

**Addition of 1a in three separate parts:** To a mixture of *C,N*-cyclic-*N'*-acyl azomethine imine **1a** (26 mg) in butyronitrile (3 mL) and MeOH (0.3 mL) was added trimethylsilyldiazomethane (0.45 mL, 2 M solution in Et<sub>2</sub>O, 0.90 mmol) and the mixture was stirred at rt. After 2 h, **1a** (26 mg) was added to the reaction mixture. After 4 h, another **1a** (25 mg) was added (totally 0.31 mmol) and the mixture was stirred at rt for 1 d. After addition of acetic acid (0.06 mL) followed by similar work-up, **5a** (65 mg, 80% yield) was obtained as a solid.

In a similar manner of the former method for **5a** by one-pot addition of **1a**, **5b–5g** were obtained from the corresponding *C,N*-cyclic-*N'*-acyl azomethine imines **1b–1g**.

**3-(*p*-Tolyl)-6,7-dihydro-1*H*-1,5-methanobenzo[*g*][1,3,4]oxadiazonine (5b):**<sup>3</sup> The reaction of **1b** (80 mg, 0.30 mmol) with trimethylsilyldiazomethane (0.45 mL, 2 M solution in Et<sub>2</sub>O, 0.90 mmol) was carried out for 1 d. The compound **5b** (64 mg, 77% yield) was obtained as an oil after purification by silica gel column chromatography (hexane/AcOEt = 8/1, 5/1, 2/1 and then 1/1). <sup>1</sup>H NMR (CDCl<sub>3</sub>, 400 MHz): δ 7.78 (d, *J* = 8.2 Hz, 2H), 7.35–7.08 (m, 4H), 7.15 (d, *J* = 8.2 Hz, 2H), 5.39 (dd, *J* = 3.2, 2.3 Hz, 1H), 3.78–3.75 (m, 1H), 3.64–3.62 (m, 2H), 3.50–3.41 (m, 2H), 2.54–2.46 (m, 1H), 2.34 (s, 3H). <sup>13</sup>C{<sup>1</sup>H} NMR (CDCl<sub>3</sub>, 100 MHz): δ 156.0, 140.1, 138.3, 131.4, 131.2, 129.7, 128.8, 128.7, 128.3, 126.5, 126.1, 78.8, 54.0, 50.1, 33.6, 21.3.

**3-(4-Chlorophenyl)-6,7-dihydro-1*H*-1,5-methanobenzo[*g*][1,3,4]oxadiazonine (5c):**<sup>3</sup> The reaction of **1c** (85 mg, 0.30 mmol) with trimethylsilyldiazomethane (0.45 mL, 2 M solution in Et<sub>2</sub>O, 0.90 mmol) was carried out for 1 d. The compound **5c** (57 mg, 64% yield) was obtained as a solid after purification by silica gel column chromatography (hexane/AcOEt = 8/1, 5/1, 3/1, 2/1 and then 1/1). <sup>1</sup>H NMR (CDCl<sub>3</sub>, 400 MHz): δ 7.82 (d, *J* = 8.7 Hz, 2H), 7.33–7.29 (m, 3H), 7.24–7.19 (m, 2H), 7.11–7.08 (m, 1H), 5.43 (d, *J* = 3.7 Hz, 1H), 3.80–3.74 (m, 1H), 3.68 (dd, *J* = 14.2, 0.9 Hz, 1H), 3.62 (dd, *J* = 14.2, 4.1 Hz, 1H), 3.51–3.35 (m, 2H), 2.56 (ddd, *J* = 15.6, 5.0, 2.3 Hz, 1H). <sup>13</sup>C{<sup>1</sup>H} NMR

(CDCl<sub>3</sub>, 100 MHz):  $\delta$  154.5, 139.8, 137.9, 136.0, 131.5, 131.3, 130.9, 129.0, 128.2, 127.4, 126.7, 78.6, 54.1, 50.0, 33.7.

**8-Methyl-3-phenyl-6,7-dihydro-1*H*-1,5-methanobenzo[*g*][1,3,4]oxadiazonine (5d):**<sup>3</sup> The reaction of **1d** (79 mg, 0.30 mmol) with trimethylsilyldiazomethane (0.45 mL, 2 M solution in Et<sub>2</sub>O, 0.90 mmol) was carried out for 1 d. The compound **5d** (52 mg, 62% yield) was obtained as a solid after purification by silica gel column chromatography (hexane/AcOEt = 6/1, 4/1 and then 3/1). <sup>1</sup>H NMR (CDCl<sub>3</sub>, 400 MHz):  $\delta$  7.91 (dd, *J* = 7.8, 1.8 Hz, 2H), 7.41–7.33 (m, 3H), 7.17–7.07 (m, 3H) 5.44 (d, *J* = 3.7 Hz, 1H), 3.77 (ddd, *J* = 14.2, 5.0, 2.8 Hz, 1H), 3.67–3.58 (m, 2H), 3.42 (ddd, *J* = 14.2, 11.0, 1.8 Hz, 1H), 3.19 (ddd, *J* = 16.5, 11.0, 2.8 Hz, 1H), 2.78 (ddd, *J* = 16.5, 5.0, 1.8 Hz, 1H), 2.30 (s, 3H). <sup>13</sup>C{<sup>1</sup>H} NMR (CDCl<sub>3</sub>, 100 MHz):  $\delta$  157.1, 138.7, 138.6, 137.1, 132.4, 131.3, 130.1, 129.6, 128.0, 126.3, 126.2, 79.8, 53.7, 50.0, 26.8, 21.3.

**10-Methyl-3-phenyl-6,7-dihydro-1*H*-1,5-methanobenzo[*g*][1,3,4]oxadiazonine (5e):**<sup>3</sup> The reaction of **1e** (79 mg, 0.30 mmol) with trimethylsilyldiazomethane (0.45 mL, 2 M solution in Et<sub>2</sub>O, 0.90 mmol) was carried out for 1 d. The compound **5e** (68 mg, 81% yield) was obtained as an oil after purification by silica gel column chromatography (hexane/AcOEt = 6/1, 4/1 and then 3/1). <sup>1</sup>H NMR (CDCl<sub>3</sub>, 400 MHz):  $\delta$  7.89 (d, *J* = 8.7 Hz, 2H), 7.40–7.32 (m, 3H), 7.13 (s, 1H), 7.03 (d, *J* = 7.8 Hz, 1H), 6.99 (d, *J* = 7.8 Hz, 1H), 5.37 (t, *J* = 2.5 Hz, 1H), 3.79–3.73 (m, 1H), 3.67–3.64 (m, 2H), 3.46–3.37 (m, 2H), 2.53–2.46 (m, 1H), 2.33 (s, 3H). <sup>13</sup>C{<sup>1</sup>H} NMR (CDCl<sub>3</sub>, 100 MHz):  $\delta$  155.8, 138.0, 136.9, 136.1, 132.5, 132.4, 131.3, 123.0, 129.4, 128.0, 126.2, 78.8, 54.2, 50.2, 33.3, 20.7.

**9-Methoxy-3-phenyl-6,7-dihydro-1*H*-1,5-methanobenzo[*g*][1,3,4]oxadiazonine (5f):**<sup>3</sup> The reaction of **1f** (82 mg, 0.29 mmol) with trimethylsilyldiazomethane (0.45 mL, 2 M solution in Et<sub>2</sub>O, 0.90 mmol) was carried out for 1 d. The compound **5f** (48 mg, 55% yield) was obtained as an oil after purification by silica gel column chromatography (hexane/AcOEt = 10/1, 8/1, 5/1, 3/1, 2/1 and then 1/1). <sup>1</sup>H NMR (CDCl<sub>3</sub>, 400 MHz):  $\delta$  7.89 (dd, *J* = 8.0, 1.6 Hz, 2H), 7.32–7.39 (m, 3H), 7.25 (d, *J* = 8.7 Hz, 1H), 6.69 (dd, *J* = 8.7, 2.7 Hz, 1H), 6.63 (d, *J* = 2.7 Hz, 1H), 5.38 (t, *J* = 2.3 Hz, 1H), 3.79 (dd, *J* = 7.3, 2.3 Hz, 1H), 3.77 (s, 3H), 3.62 (d, *J* = 2.3 Hz, 2H), 3.38–3.49 (m, 2H), 2.43–2.52 (m, 1H). <sup>13</sup>C{<sup>1</sup>H} NMR (CDCl<sub>3</sub>, 100 MHz):  $\delta$  159.5, 155.7, 141.6, 133.0, 132.5, 130.6, 129.9, 128.0, 126.1, 117.2, 110.7, 78.1, 55.1, 54.1, 50.4, 33.8.

**10-Bromo-3-phenyl-6,7-dihydro-1*H*-1,5-methanobenzo[*g*][1,3,4]oxadiazonine (5g):**<sup>3</sup> The reaction of **1g** (98 mg, 0.30 mmol) with trimethylsilyldiazomethane (0.45 mL, 2 M solution in Et<sub>2</sub>O, 0.90 mmol) was carried out for 1 d. The compound **5g** (86 mg, 85% yield) was obtained as an oil after purification by silica gel column chromatography (hexane/AcOEt = 8/1, 5/1, 2/1 and then 1/1). <sup>1</sup>H NMR (CDCl<sub>3</sub>, 400 MHz):  $\delta$  7.88 (dd, *J* = 8.2, 1.8 Hz, 2H), 7.46 (d, *J* = 2.3 Hz, 1H), 7.41–7.30 (m, 4H), 6.95 (d, *J* = 7.8 Hz, 1H), 5.34 (d, *J* = 2.3 Hz, 1H), 3.79–3.73 (m, 1H), 3.67–3.58 (m, 2H), 3.47–3.33 (m, 2H), 2.53–2.46 (m, 1H). <sup>13</sup>C{<sup>1</sup>H} NMR (CDCl<sub>3</sub>, 100 MHz):  $\delta$  155.4, 140.1, 138.9, 134.2, 132.9, 132.2, 131.6, 130.1, 128.2, 128.1, 126.1, 120.0, 77.7, 53.8, 49.8, 33.2.

#### 4. Procedure for the conversion of 4a to 6 and analytical data of 6

**Ethyl 3-Benzamido-2,3-dihydro-1H-benzo[d]azepine-4-carboxylate (6):** The mixture of the diazo compounds **4a** (53 mg, 0.15 mmol) and Rh<sub>2</sub>(OAc)<sub>4</sub> (2 mg, 0.005 mmol) in CH<sub>2</sub>Cl<sub>2</sub> (18 mL) was stirred at room temperature for 18 h.<sup>4</sup> The reaction mixture was passed through a pad of silica gel and the solution was condensed under reduced pressure. The resulted crude products were purified by silica gel column chromatography (hexane/AcOEt = 6/1, 3/1 and then 2/1) to give **6** as a solid (48 mg, 97% yield). *R*<sub>f</sub> = 0.6 (hexane/AcOEt = 1/1, v/v). Mp. 191–192 °C (AcOEt/hexane). <sup>1</sup>H NMR (CDCl<sub>3</sub>, 400 MHz): δ 9.03 (s, 1H), 7.92 (d, *J* = 7.3 Hz, 2H), 7.61 (t, *J* = 7.3 Hz, 1H), 7.53 (t, *J* = 7.3 Hz, 2H), 7.13–7.16 (m, 2H), 7.06–6.96 (m, 1H), 6.62 (s, 1H), 6.50–6.44 (m, 1H), 3.78–3.71 (m, 2H), 3.49–3.42 (m, 2H), 3.15–3.10 (m, 2H), 0.93–0.88 (m, 3H). <sup>13</sup>C {<sup>1</sup>H} NMR (CDCl<sub>3</sub>, 100 MHz): δ 167.2, 165.3, 141.4, 135.4, 133.3, 132.2, 132.0, 129.4, 128.7, 127.6, 127.4, 126.1, 120.6, 61.7, 54.3, 35.0, 13.5; one signal overlaps. IR (KBr) 3230, 3054, 1716, 1655, 1620, 1542, 1302, 1251, 1215, 1067, 918, 774, 694 cm<sup>-1</sup>. HRMS (ESI) *m/z*: [M+H]<sup>+</sup> Calcd for C<sub>20</sub>H<sub>21</sub>N<sub>2</sub>O<sub>3</sub> 337.1552; Found 337.1553. CCDC-2129011 contains the supplementary crystallographic data for **6**.



5. ORTEPs of 4a and 6 (Ellipsoid contour percent probability level is 50%)

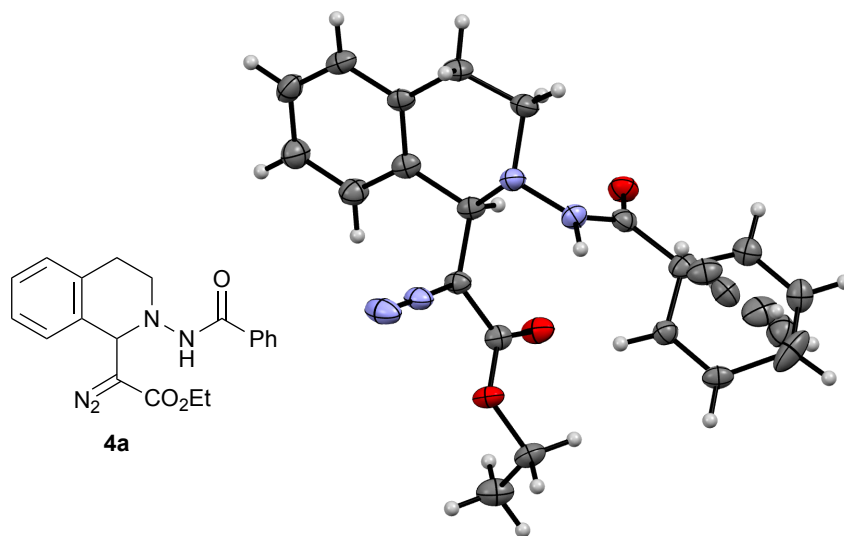

Figure S1. X-ray Structure of **4a** (CCDC-2129155)

Unit cell parameters:  $a = 4.9174(3)$ ,  $b = 16.0704(9)$ ,  $c = 11.6190(7)$ ,  $P2_1$ .  $R = 0.0562$ .

## checkCIF/PLATON report

Structure factors have been supplied for datablock(s) 191207\_rtakahashi4\_2\_0m\_a

THIS REPORT IS FOR GUIDANCE ONLY. IF USED AS PART OF A REVIEW PROCEDURE FOR PUBLICATION, IT SHOULD NOT REPLACE THE EXPERTISE OF AN EXPERIENCED CRYSTALLOGRAPHIC REFEREE.

No syntax errors found.      CIF dictionary      Interpreting this report

### Datablock: 191207\_rtakahashi4\_2\_0m\_a

---

Bond precision:      C-C = 0.0066 Å      Wavelength=1.54178

Cell:                      a=4.9174 (3)      b=16.0704 (9)      c=11.6190 (7)  
                                    alpha=90      beta=90.199 (3)      gamma=90

Temperature:              90 K

|                        | Calculated    | Reported      |
|------------------------|---------------|---------------|
| Volume                 | 918.18 (9)    | 918.18 (9)    |
| Space group            | P 21          | P 21          |
| Hall group             | P 2yb         | P 2yb         |
| Moiety formula         | C20 H20 N4 O3 | ?             |
| Sum formula            | C20 H20 N4 O3 | C20 H20 N4 O3 |
| Mr                     | 364.40        | 364.40        |
| Dx, g cm <sup>-3</sup> | 1.318         | 1.318         |
| Z                      | 2             | 2             |
| Mu (mm <sup>-1</sup> ) | 0.744         | 0.744         |
| F000                   | 384.0         | 384.0         |
| F000'                  | 385.19        |               |
| h, k, lmax             | 6, 19, 14     | 5, 19, 14     |
| Nref                   | 3648 [ 1893]  | 3403          |
| Tmin, Tmax             | 0.836, 0.862  |               |
| Tmin'                  | 0.743         |               |

Correction method= Not given

Data completeness= 1.80/0.93      Theta (max)= 72.649

R(reflections)= 0.0562 ( 3300)      wR2(reflections)=  
S = 1.075      Npar= 286      0.1597 ( 3403)

The following ALERTS were generated. Each ALERT has the format  
**test-name\_ALERT\_alert-type\_alert-level.**  
Click on the hyperlinks for more details of the test.

### Alert level B

PLAT332\_ALERT\_2\_B Large Phenyl C-C Range C3 -C19 . 0.35 Ang.

### Alert level C

PLAT089\_ALERT\_3\_C Poor Data / Parameter Ratio (Zmax < 18) ..... 6.41 Note  
PLAT241\_ALERT\_2\_C High 'MainMol' Ueq as Compared to Neighbors of C16 Check  
PLAT340\_ALERT\_3\_C Low Bond Precision on C-C Bonds ..... 0.00662 Ang.  
PLAT353\_ALERT\_3\_C Long N-H (N0.87,N1.01A) N1 - H24 . 1.02 Ang.  
PLAT911\_ALERT\_3\_C Missing FCF Refl Between Thmin & STh/L= 0.600 28 Report  
PLAT934\_ALERT\_3\_C Number of (Iobs-Icalc)/Sigma(W) > 10 Outliers .. 1 Check

### Alert level G

PLAT230\_ALERT\_2\_G Hirshfeld Test Diff for C16 --C18 . 8.2 s.u.  
PLAT230\_ALERT\_2\_G Hirshfeld Test Diff for C16 --C21 . 8.4 s.u.  
PLAT300\_ALERT\_4\_G Atom Site Occupancy of C17 Constrained at 0.5 Check  
PLAT300\_ALERT\_4\_G Atom Site Occupancy of C18 Constrained at 0.5 Check  
PLAT300\_ALERT\_4\_G Atom Site Occupancy of C19 Constrained at 0.5 Check  
PLAT300\_ALERT\_4\_G Atom Site Occupancy of C20 Constrained at 0.5 Check  
PLAT300\_ALERT\_4\_G Atom Site Occupancy of C21 Constrained at 0.5 Check  
PLAT300\_ALERT\_4\_G Atom Site Occupancy of C22 Constrained at 0.5 Check  
PLAT300\_ALERT\_4\_G Atom Site Occupancy of C23 Constrained at 0.5 Check  
PLAT300\_ALERT\_4\_G Atom Site Occupancy of C24 Constrained at 0.5 Check  
PLAT300\_ALERT\_4\_G Atom Site Occupancy of H14 Constrained at 0.5 Check  
PLAT300\_ALERT\_4\_G Atom Site Occupancy of H15 Constrained at 0.5 Check  
PLAT300\_ALERT\_4\_G Atom Site Occupancy of H16 Constrained at 0.5 Check  
PLAT300\_ALERT\_4\_G Atom Site Occupancy of H17 Constrained at 0.5 Check  
PLAT300\_ALERT\_4\_G Atom Site Occupancy of H18 Constrained at 0.5 Check  
PLAT300\_ALERT\_4\_G Atom Site Occupancy of H19 Constrained at 0.5 Check  
PLAT300\_ALERT\_4\_G Atom Site Occupancy of H20 Constrained at 0.5 Check  
PLAT300\_ALERT\_4\_G Atom Site Occupancy of H21 Constrained at 0.5 Check  
PLAT301\_ALERT\_3\_G Main Residue Disorder ..... (Resd 1 ) 15% Note  
PLAT410\_ALERT\_2\_G Short Intra H...H Contact H19 ..H23 . 2.11 Ang.  
x,y,z = 1\_555 Check  
PLAT414\_ALERT\_2\_G Short Intra D-H...H-X H14 ..H24 2.08 Ang.  
x,y,z = 1\_555 Check  
PLAT414\_ALERT\_2\_G Short Intra D-H...H-X H20 ..H24 2.07 Ang.  
x,y,z = 1\_555 Check  
PLAT791\_ALERT\_4\_G Model has Chirality at C4 (Sohnke SpGr) R Verify  
PLAT883\_ALERT\_1\_G No Info/Value for \_atom\_sites\_solution\_primary . Please Do !  
PLAT912\_ALERT\_4\_G Missing # of FCF Reflections Above STh/L= 0.600 14 Note  
PLAT913\_ALERT\_3\_G Missing # of Very Strong Reflections in FCF .... 1 Note  
PLAT941\_ALERT\_3\_G Average HKL Measurement Multiplicity ..... 3.8 Low  
PLAT965\_ALERT\_2\_G The SHELXL WEIGHT Optimisation has not Converged Please Check  
PLAT978\_ALERT\_2\_G Number C-C Bonds with Positive Residual Density. 2 Info

0 **ALERT level A** = Most likely a serious problem - resolve or explain

1 **ALERT level B** = A potentially serious problem, consider carefully

6 **ALERT level C** = Check. Ensure it is not caused by an omission or oversight

29 **ALERT level G** = General information/check it is not something unexpected

1 ALERT type 1 CIF construction/syntax error, inconsistent or missing data

9 ALERT type 2 Indicator that the structure model may be wrong or deficient

8 ALERT type 3 Indicator that the structure quality may be low

18 ALERT type 4 Improvement, methodology, query or suggestion

0 ALERT type 5 Informative message, check

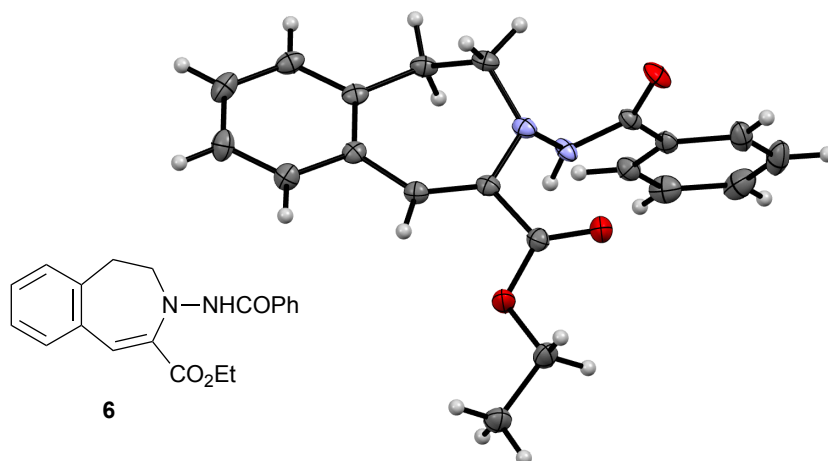

Figure S2. X-ray Structure of **6** (CCDC-2129011)

Unit cell parameters:  $a = 9.8436(4)$ ,  $b = 18.8060(7)$ ,  $c = 18.8060(7)$ ,  $Pbca$ .  $R = 0.0347$ .

## checkCIF/PLATON report

Structure factors have been supplied for datablock(s) 210917\_sakurai\_0ma

THIS REPORT IS FOR GUIDANCE ONLY. IF USED AS PART OF A REVIEW PROCEDURE FOR PUBLICATION, IT SHOULD NOT REPLACE THE EXPERTISE OF AN EXPERIENCED CRYSTALLOGRAPHIC REFEREE.

No syntax errors found.    CIF dictionary    Interpreting this report

### Datablock: 210917\_sakurai\_0ma

---

Bond precision:    C-C = 0.0016 A                      Wavelength=1.54178

Cell:                      a=9.8436(4)              b=18.8060(7)              c=18.8060(7)  
                                alpha=90                      beta=90                      gamma=90

Temperature:              273 K

|                        | Calculated    | Reported      |
|------------------------|---------------|---------------|
| Volume                 | 3481.3(2)     | 3481.3(2)     |
| Space group            | P b c a       | P b c a       |
| Hall group             | -P 2ac 2ab    | -P 2ac 2ab    |
| Moiety formula         | C20 H20 N2 O3 | C20 H20 N2 O3 |
| Sum formula            | C20 H20 N2 O3 | C20 H20 N2 O3 |
| Mr                     | 336.38        | 336.39        |
| Dx, g cm <sup>-3</sup> | 1.284         | 1.284         |
| Z                      | 8             | 8             |
| Mu (mm <sup>-1</sup> ) | 0.705         | 0.705         |
| F000                   | 1424.0        | 1428.6        |
| F000'                  | 1428.34       |               |
| h, k, lmax             | 12, 23, 23    | 11, 23, 23    |
| Nref                   | 3445          | 3421          |
| Tmin, Tmax             | 0.881, 0.945  | 0.626, 0.754  |
| Tmin'                  | 0.400         |               |

Correction method= # Reported T Limits: Tmin=0.626 Tmax=0.754  
AbsCorr = MULTI-SCAN

Data completeness= 0.993                      Theta(max)= 72.490

R(reflections)= 0.0347( 3203)

wR2(reflections)=  
0.0871( 3421)

S = 1.038

Npar= 227

---

The following ALERTS were generated. Each ALERT has the format

**test-name\_ALERT\_alert-type\_alert-level.**

Click on the hyperlinks for more details of the test.

---

**Alert level B**

CRYSS02\_ALERT\_3\_B The value of `_exptl_crystal_size_max` is > 1.0  
Maximum crystal size given = 1.300

---

**Alert level C**

PLAT790\_ALERT\_4\_C Centre of Gravity not Within Unit Cell: Resd. # 1 Note  
C20 H20 N2 O3  
PLAT911\_ALERT\_3\_C Missing FCF Refl Between Thmin & STh/L= 0.600 6 Report

---

**Alert level G**

PLAT063\_ALERT\_4\_G Crystal Size Possibly too Large for Beam Size .. 1.30 mm  
PLAT068\_ALERT\_1\_G Reported F000 Differs from Calcd (or Missing)... Please Check  
PLAT073\_ALERT\_1\_G H-atoms ref, but `_hydrogen_treatment` Reported as constr Check  
PLAT199\_ALERT\_1\_G Reported `_cell_measurement_temperature` ..... (K) 273 Check  
PLAT200\_ALERT\_1\_G Reported `_diffrn_ambient_temperature` ..... (K) 273 Check  
PLAT769\_ALERT\_4\_G CIF Embedded explicitly supplied scattering data Please Note  
PLAT912\_ALERT\_4\_G Missing # of FCF Reflections Above STh/L= 0.600 3 Note  
PLAT960\_ALERT\_3\_G Number of Intensities with  $I < -2 \cdot \text{sig}(I)$  ... 1 Check  
PLAT978\_ALERT\_2\_G Number C-C Bonds with Positive Residual Density. 11 Info  
PLAT982\_ALERT\_1\_G The C-f' = 0.0192 Deviates from IT-value = 0.0181 Check  
PLAT982\_ALERT\_1\_G The N-f' = 0.0326 Deviates from IT-value = 0.0311 Check  
PLAT982\_ALERT\_1\_G The O-f' = 0.0524 Deviates from IT-value = 0.0492 Check  
PLAT983\_ALERT\_1\_G The O-f" = 0.0338 Deviates from IT-Value = 0.0322 Check

---

0 **ALERT level A** = Most likely a serious problem - resolve or explain  
1 **ALERT level B** = A potentially serious problem, consider carefully  
2 **ALERT level C** = Check. Ensure it is not caused by an omission or oversight  
13 **ALERT level G** = General information/check it is not something unexpected

8 ALERT type 1 CIF construction/syntax error, inconsistent or missing data  
1 ALERT type 2 Indicator that the structure model may be wrong or deficient  
3 ALERT type 3 Indicator that the structure quality may be low  
4 ALERT type 4 Improvement, methodology, query or suggestion  
0 ALERT type 5 Informative message, check

---

## 6. References

1. (a) T. Hashimoto, Y. Maeda, M. Omote, H. Nakatsu and K. Maruoka, *J. Am. Chem. Soc.*, 2010, **132**, 4076; (b) K. Wang, Y. Li, X. Wang and B. Zhu, *ChemistrySelect*, 2019, **4**, 3340.
2. D. Zhang, J. Liu, Z. Kang, H. Qiu and W. Hu, *Org. Biomol. Chem.*, 2019, **17**, 9844.
3. T. Soeta, T. Ohgai, T. Sakai, S. Fujinami and Y. Ukaji, *Org. Lett.*, 2014, **16**, 4854.
4. J. Huang, L. Li, T. Xiao, Z.-W. Mao and L. Zhou, *Asian J. Org. Chem.*, 2016, **5**, 1204.

## 7. NMR Spectra of compounds

### 1) $^1\text{H}$ and $^{13}\text{C}$ NMR spectra of $\alpha$ -diazoacetate moiety-introduced tetrahydroisoquinolines **4a-4g**

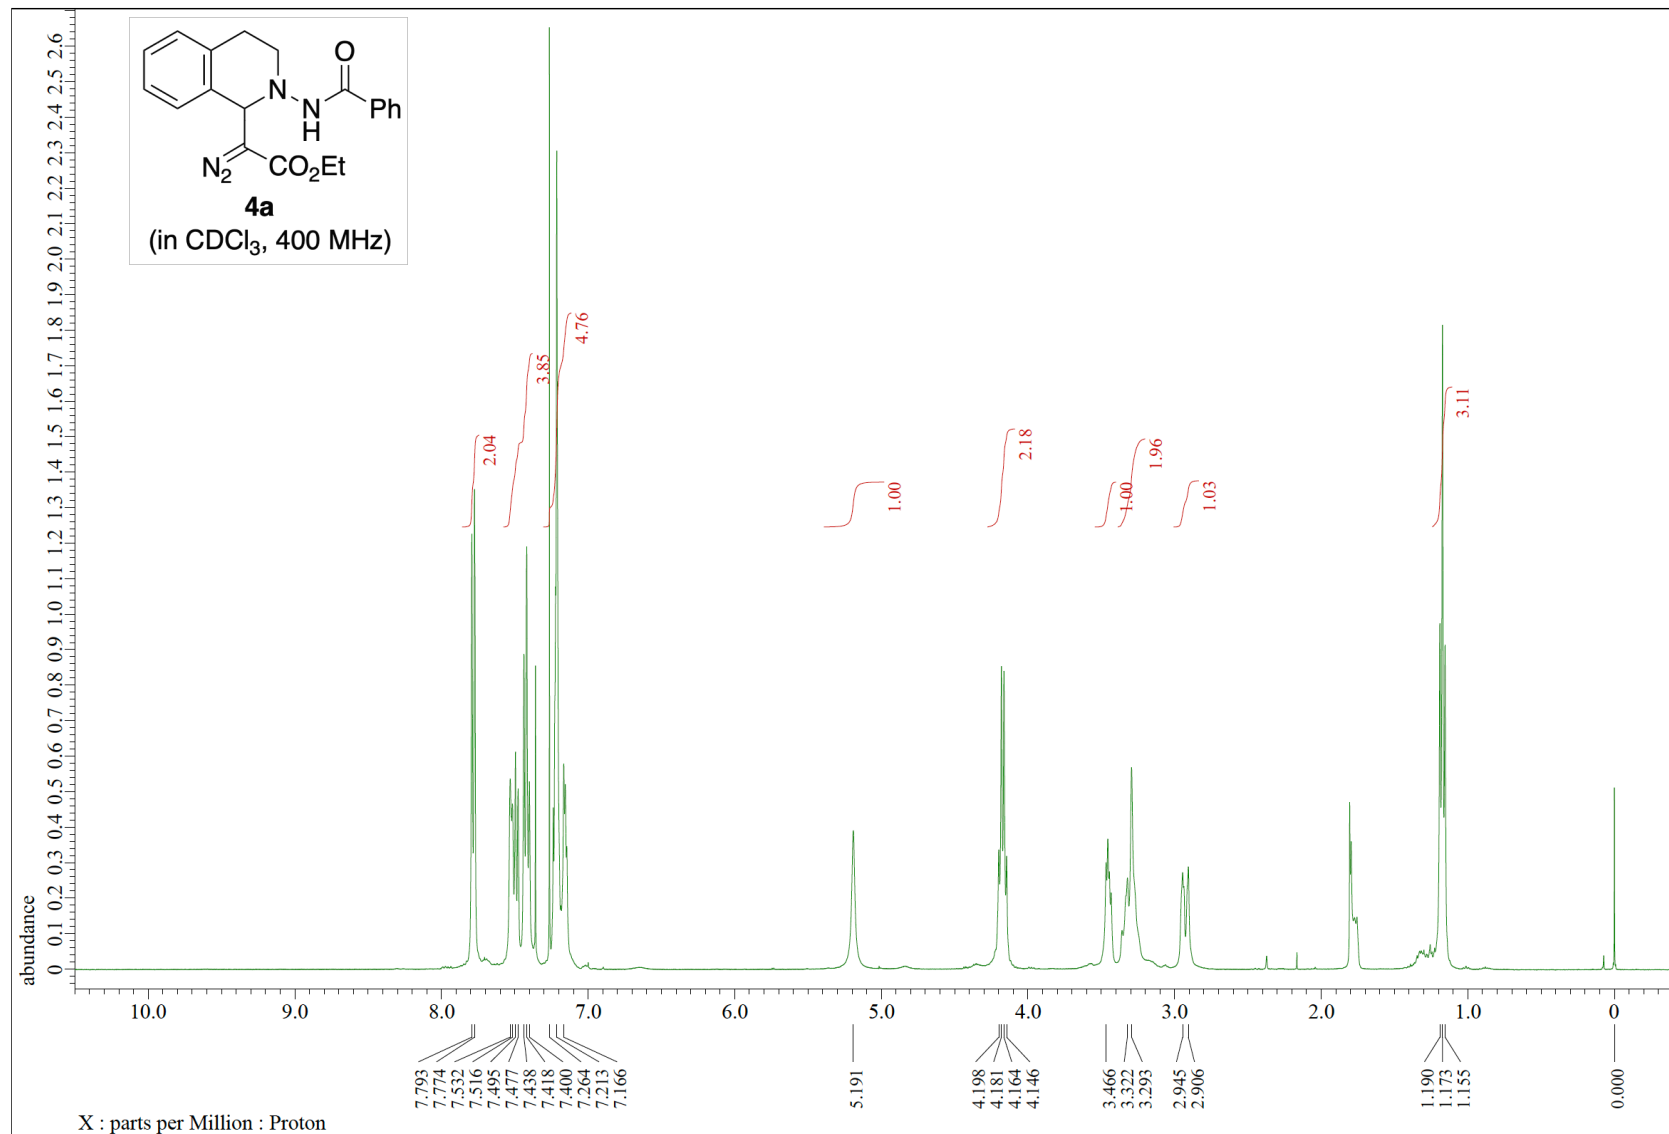



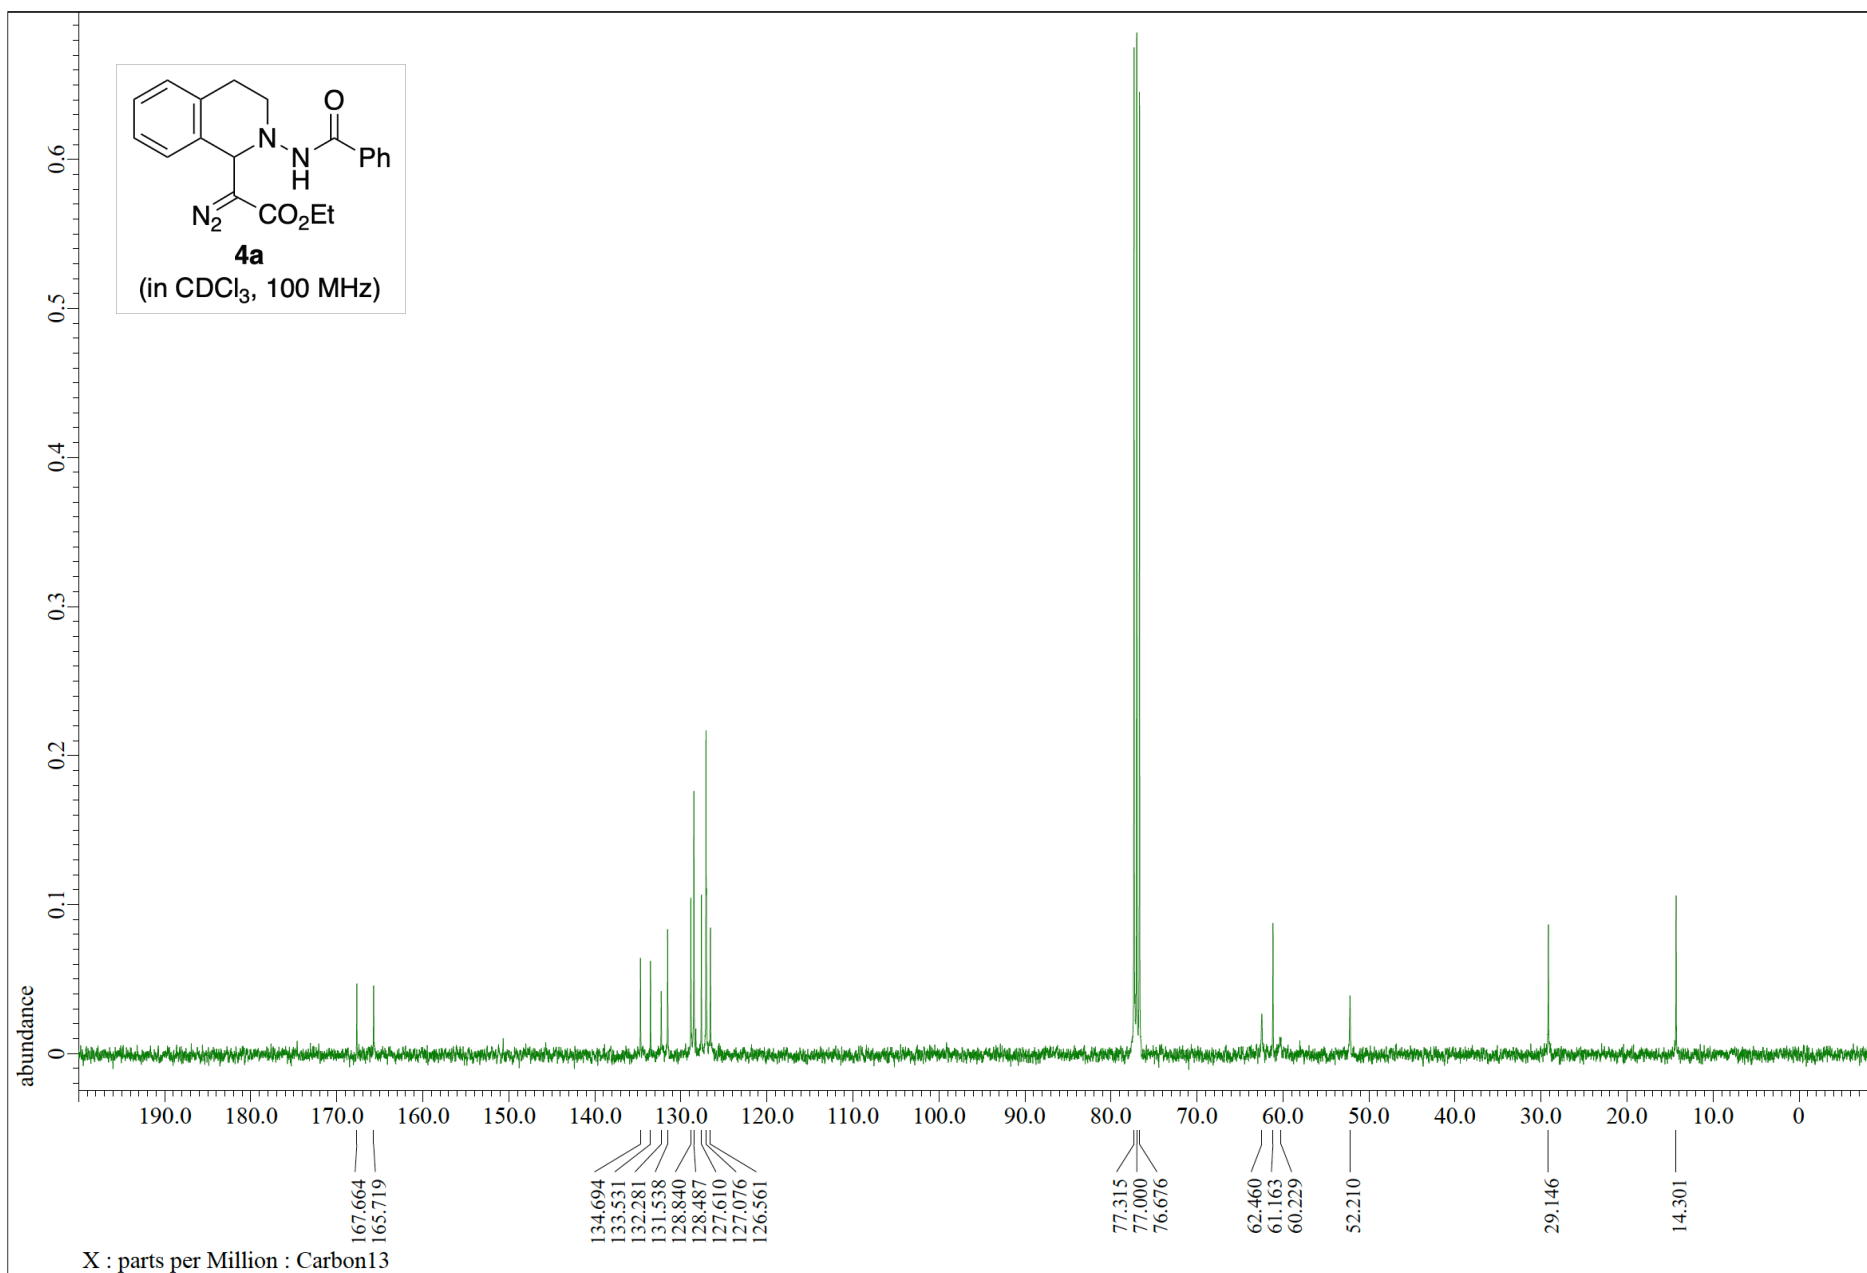

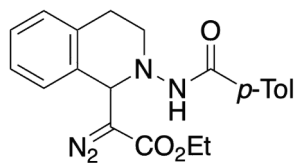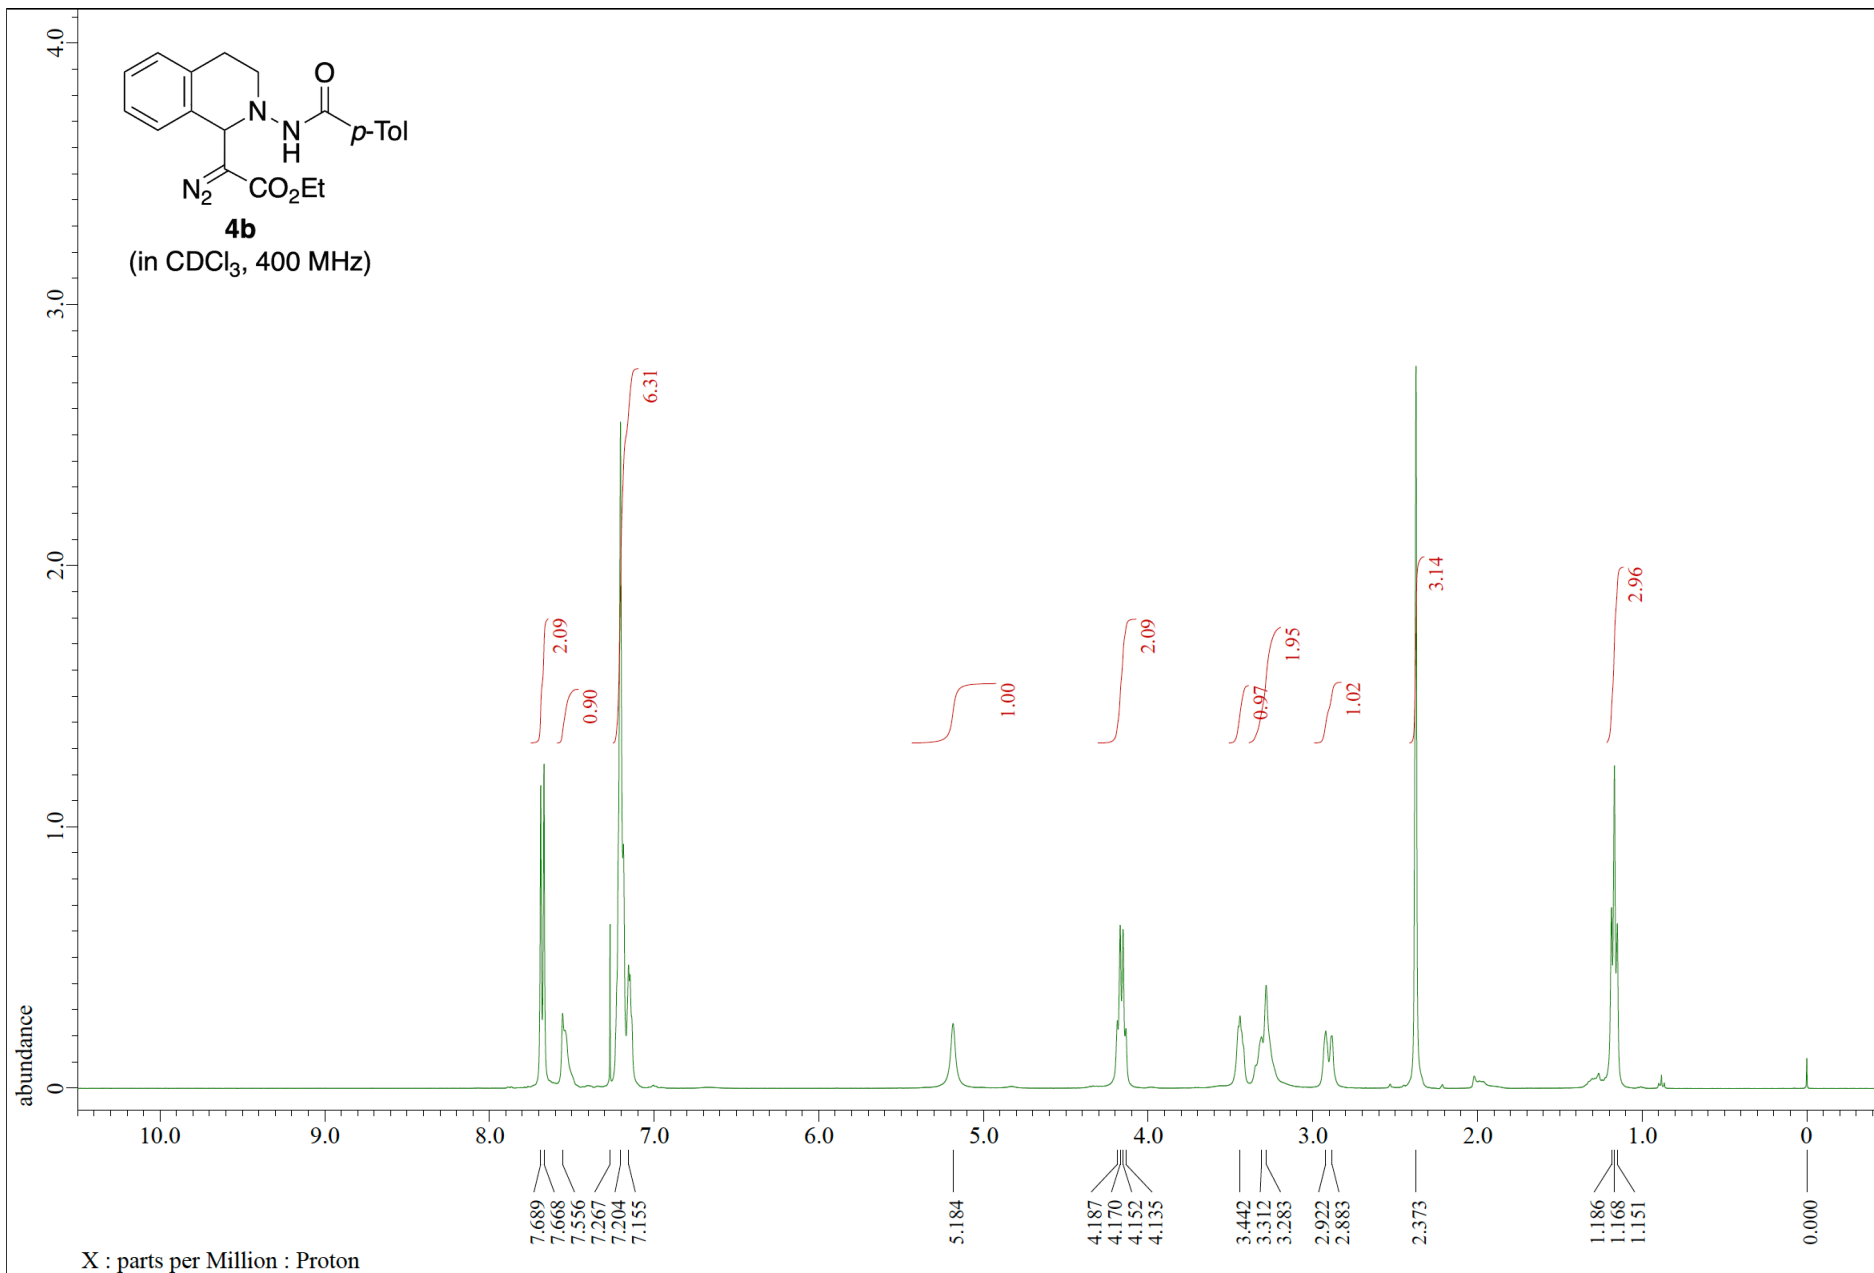

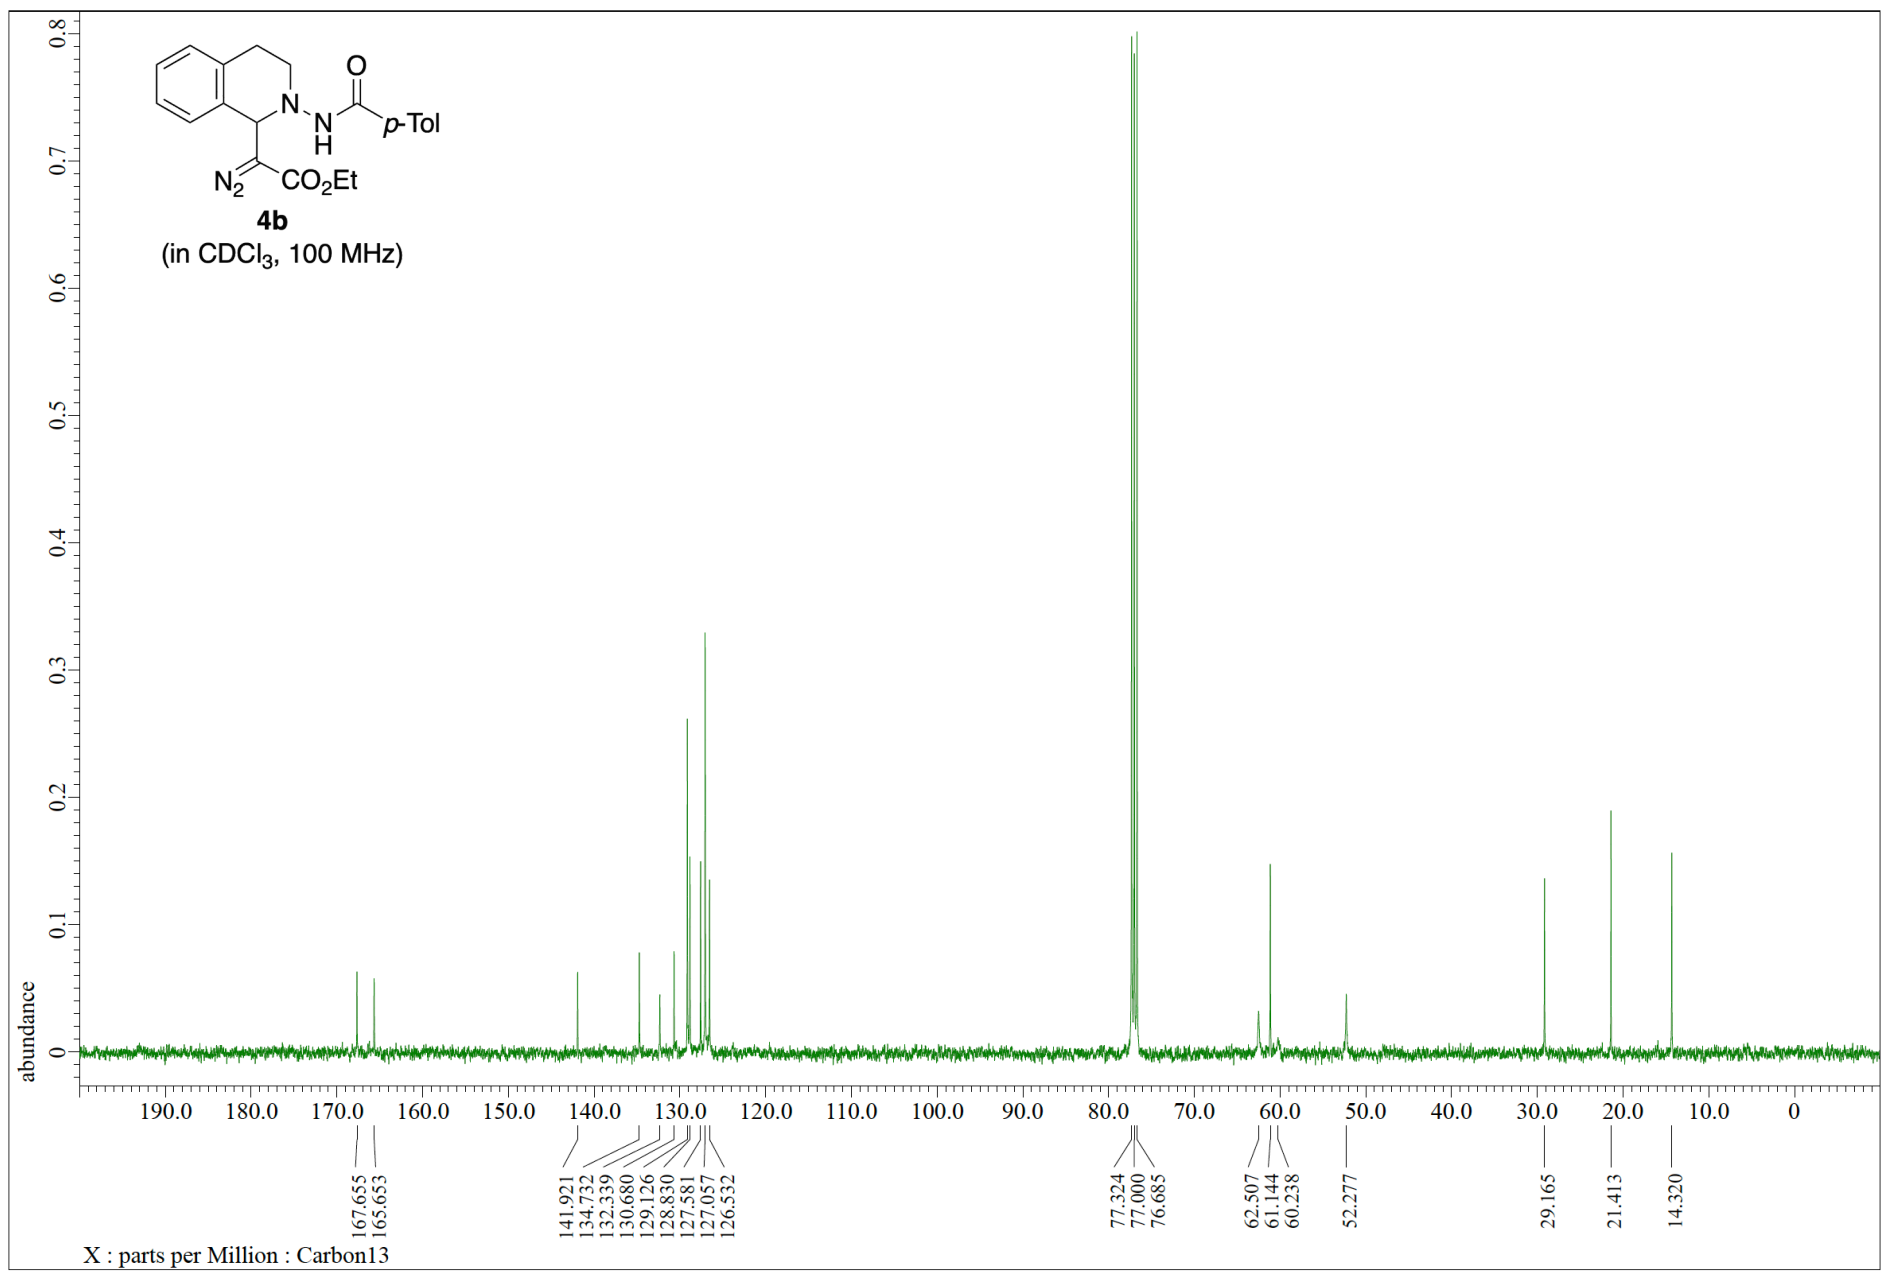

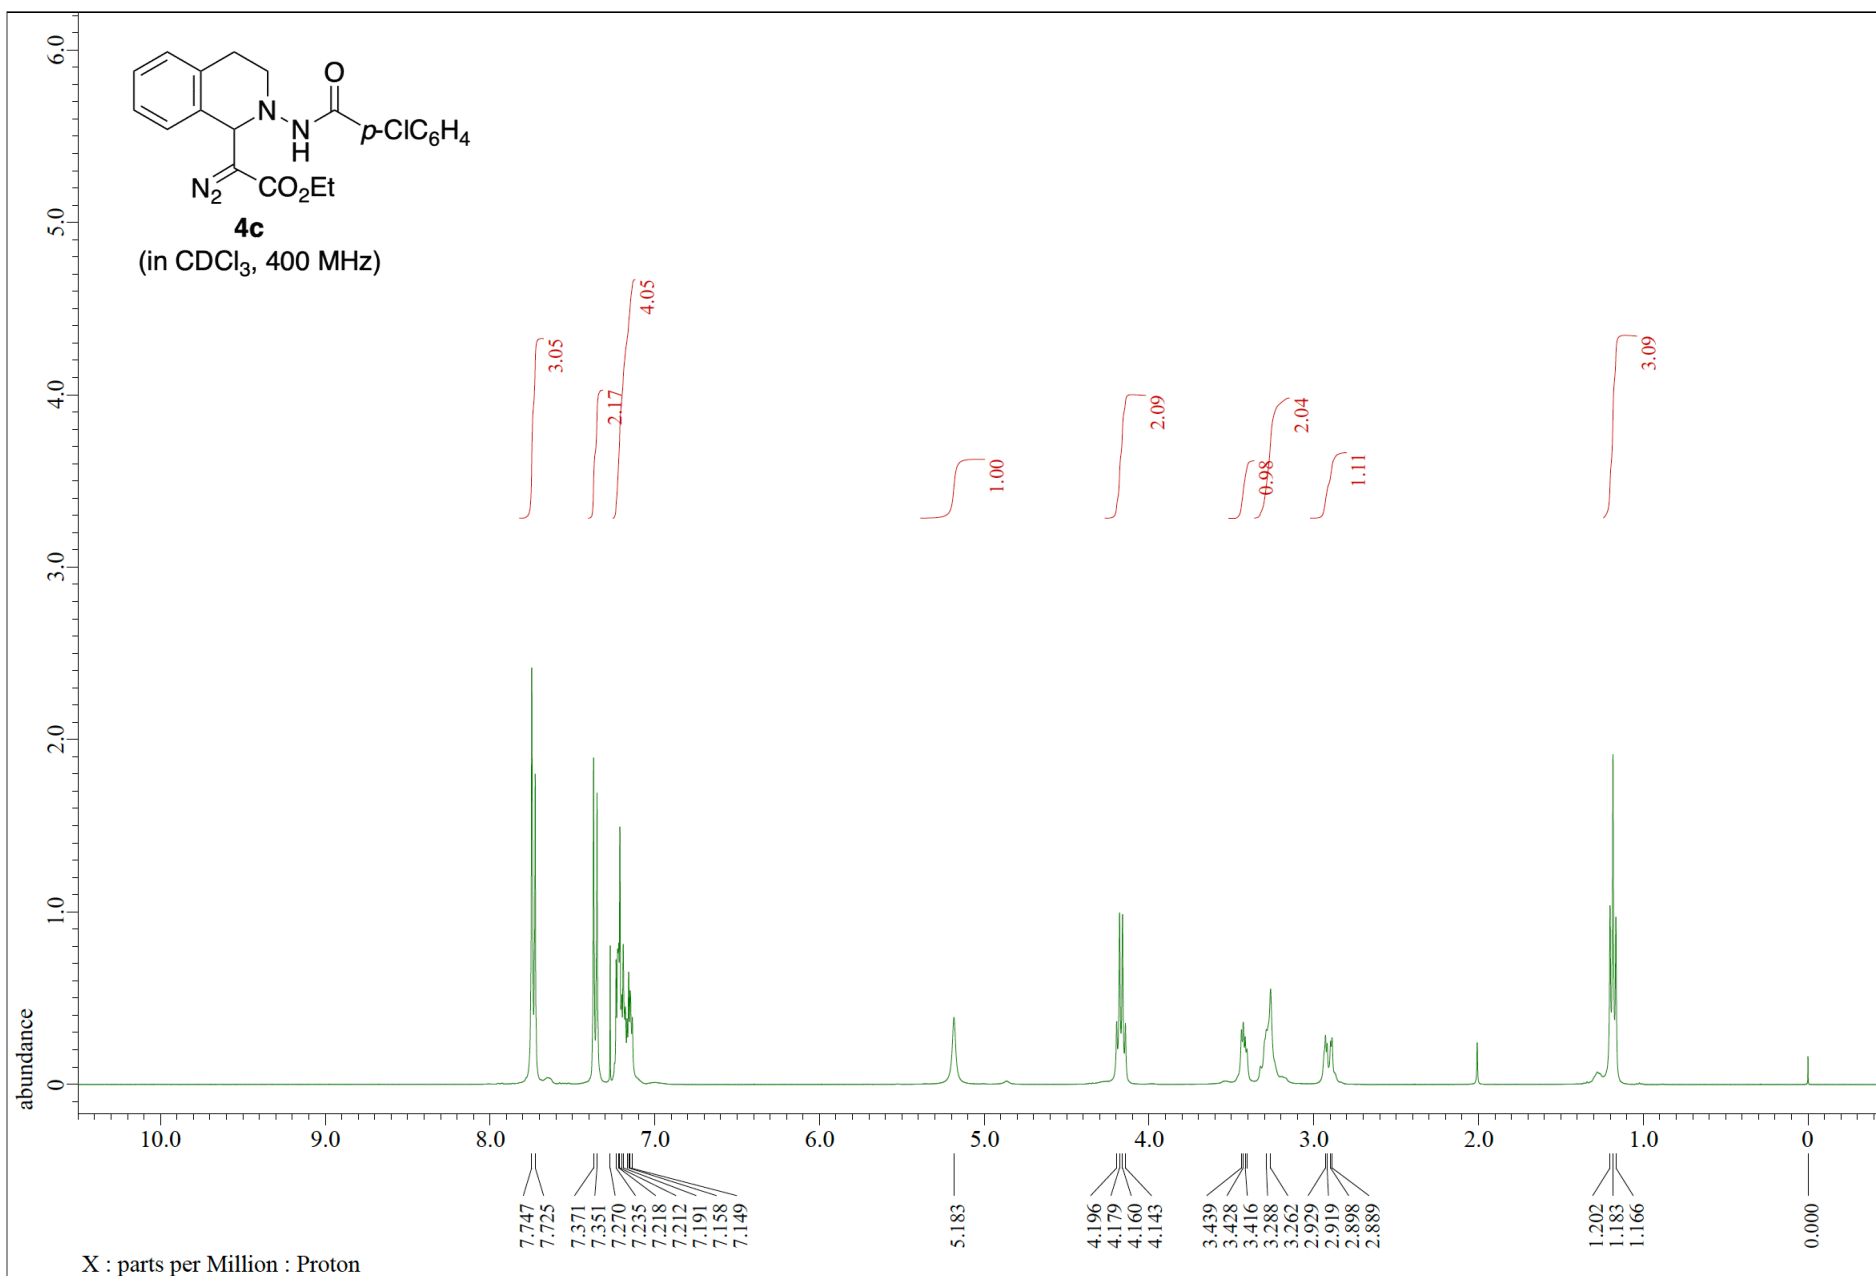

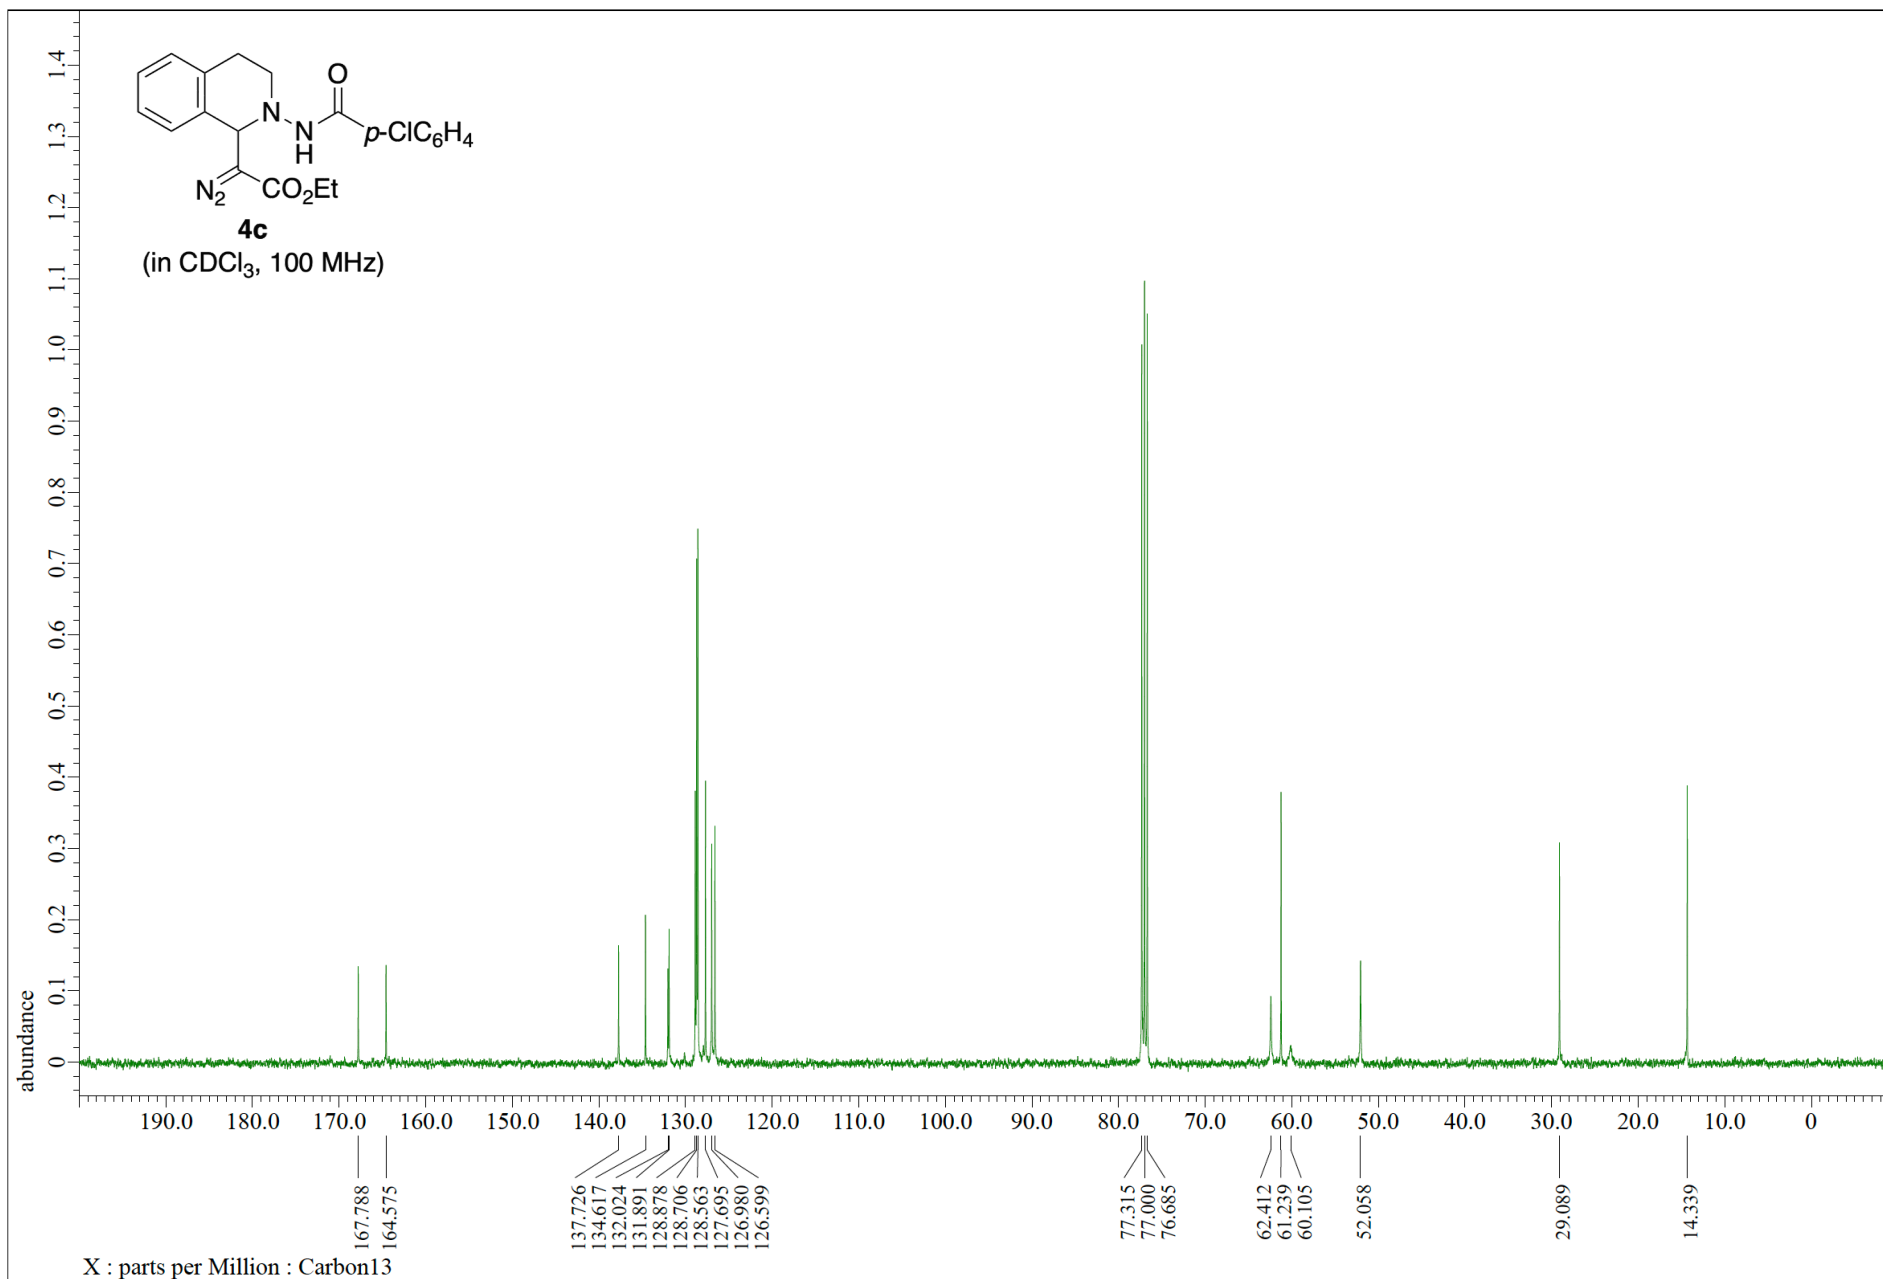

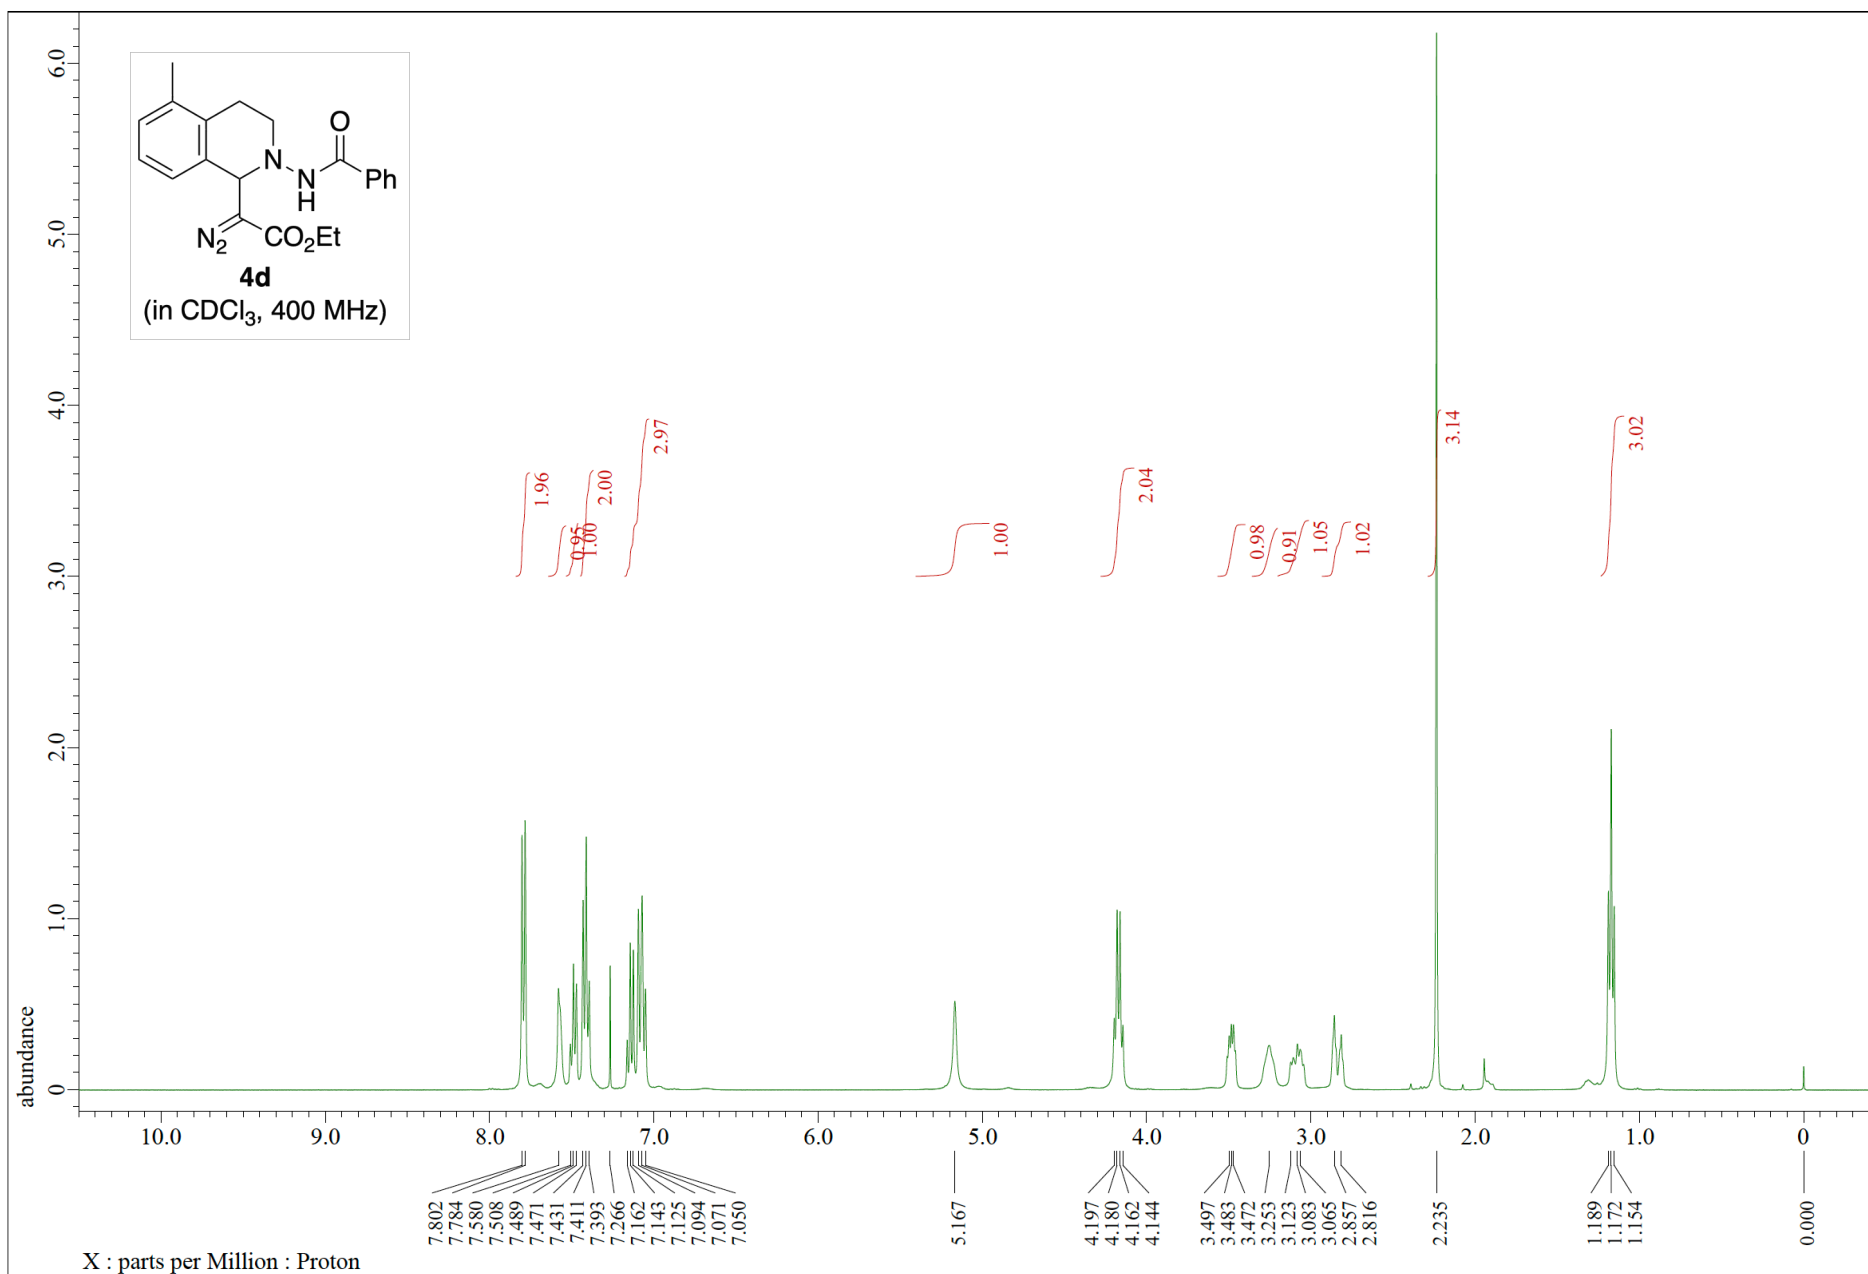

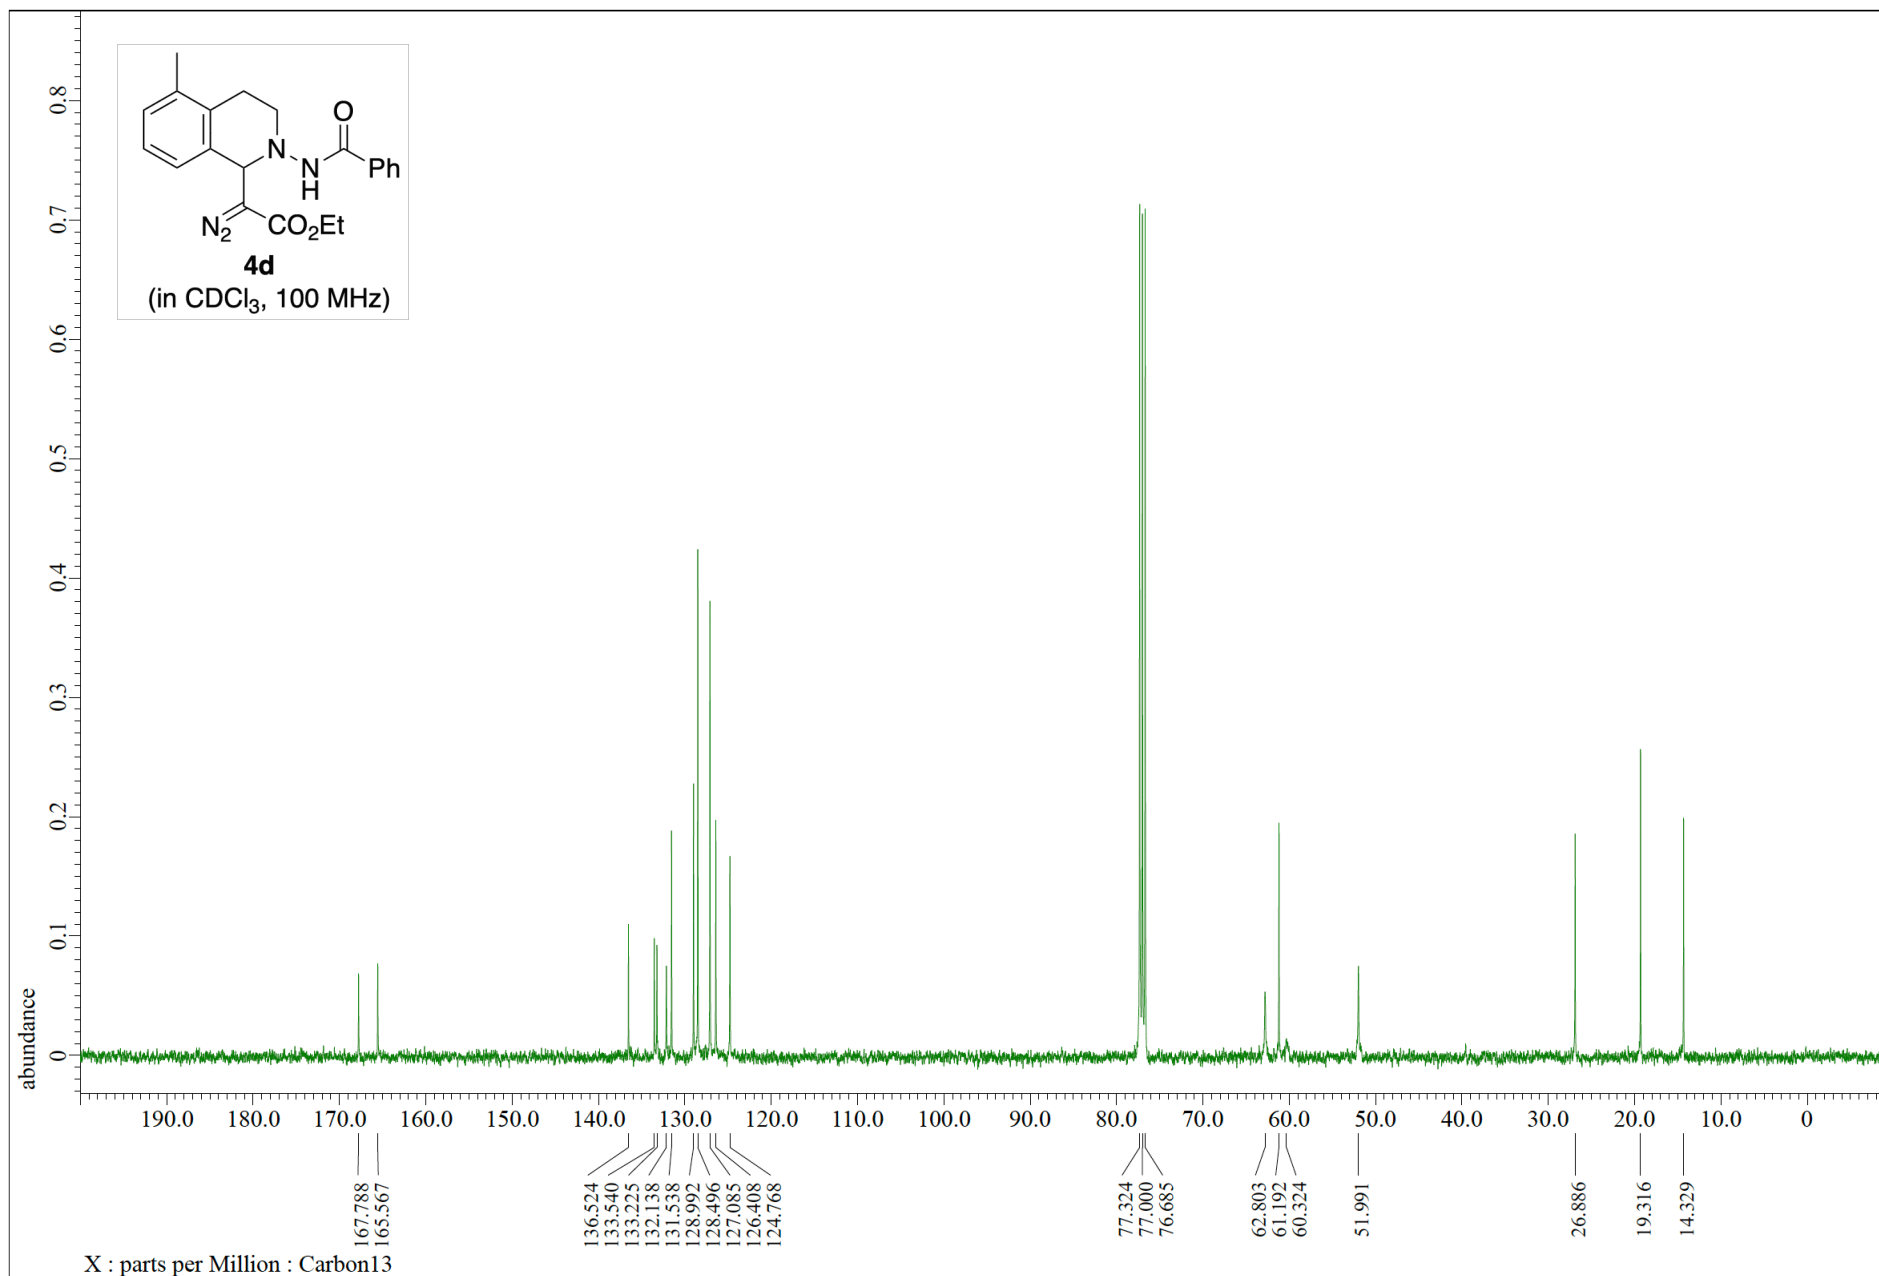

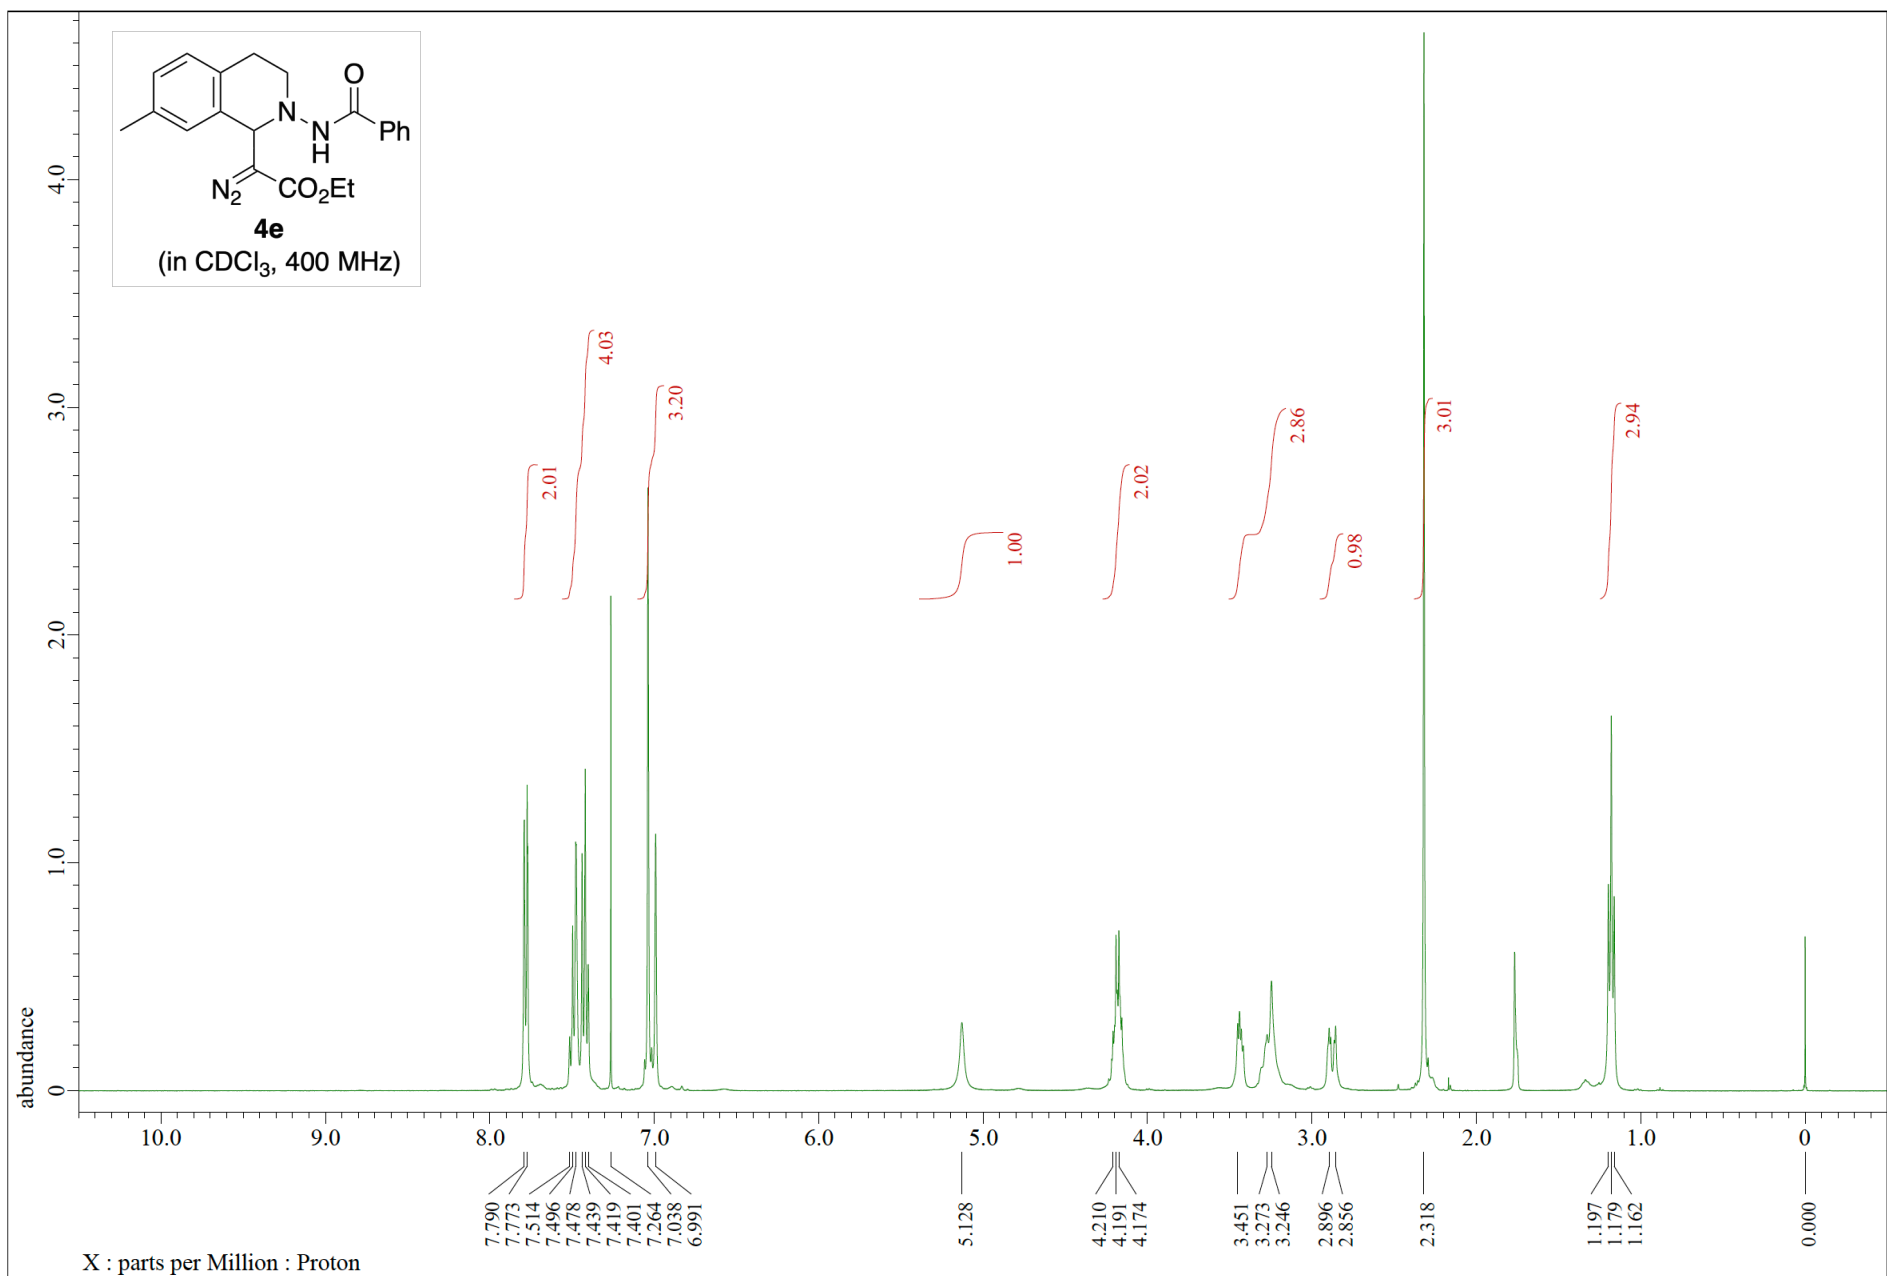



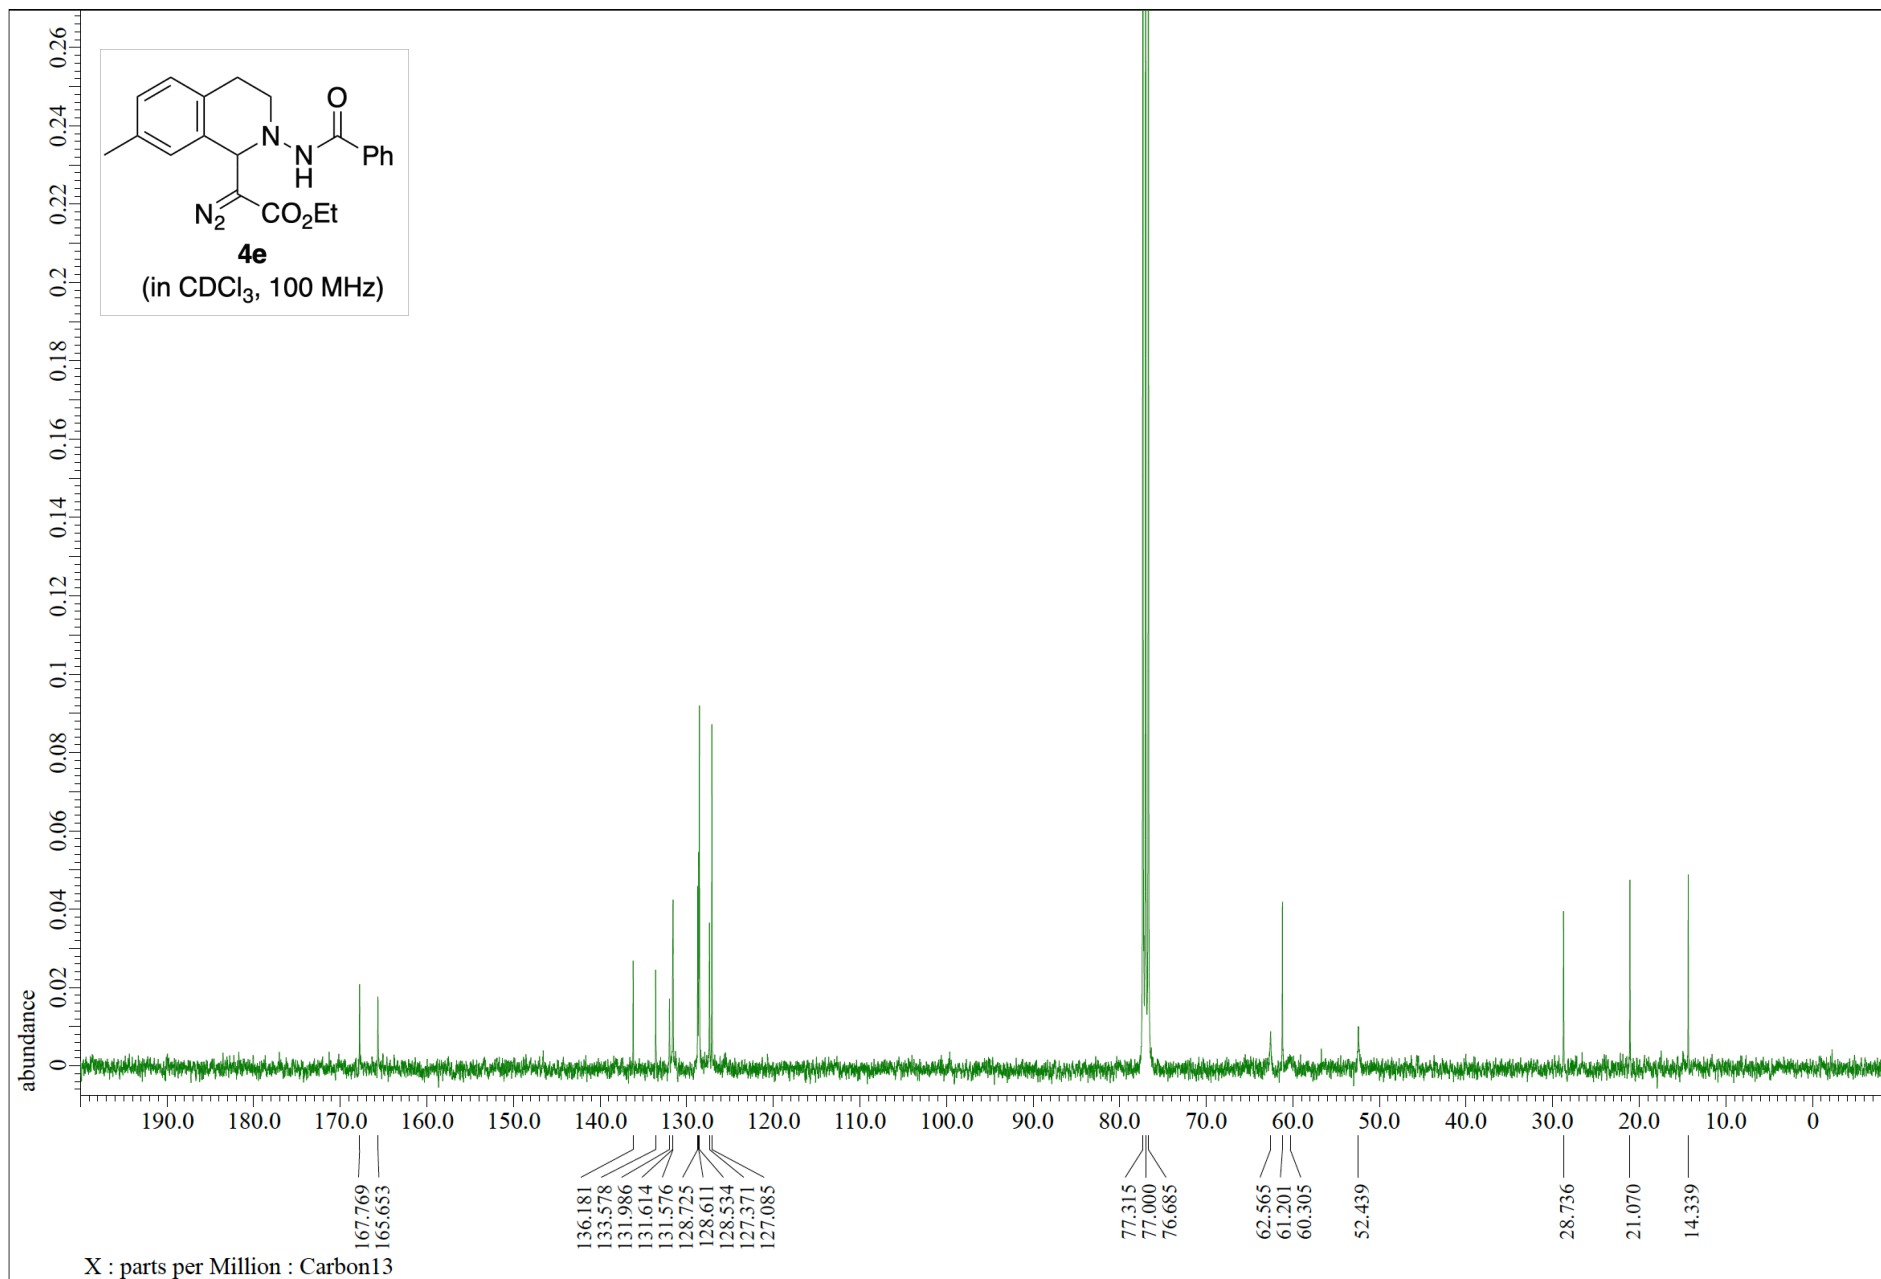

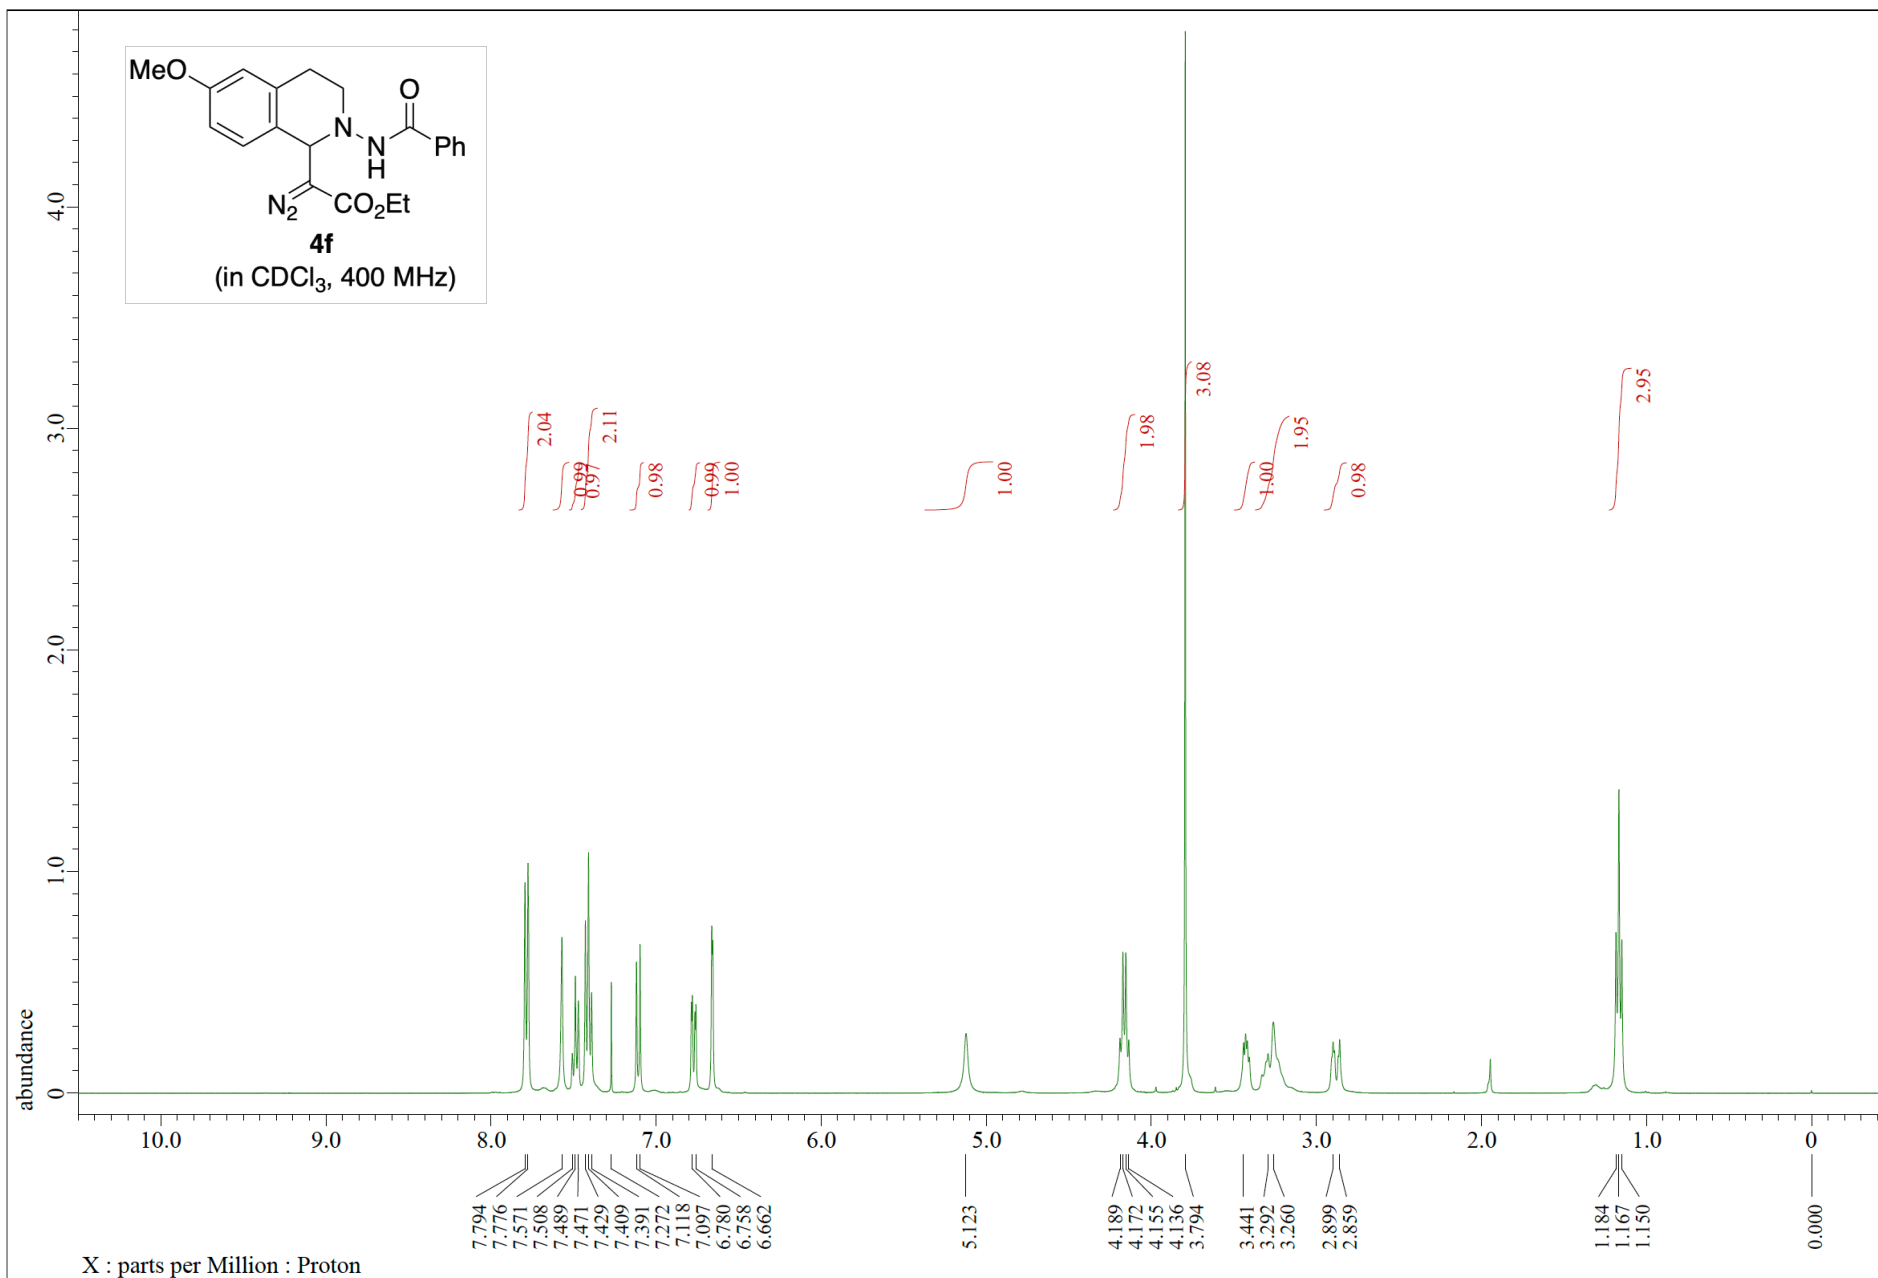

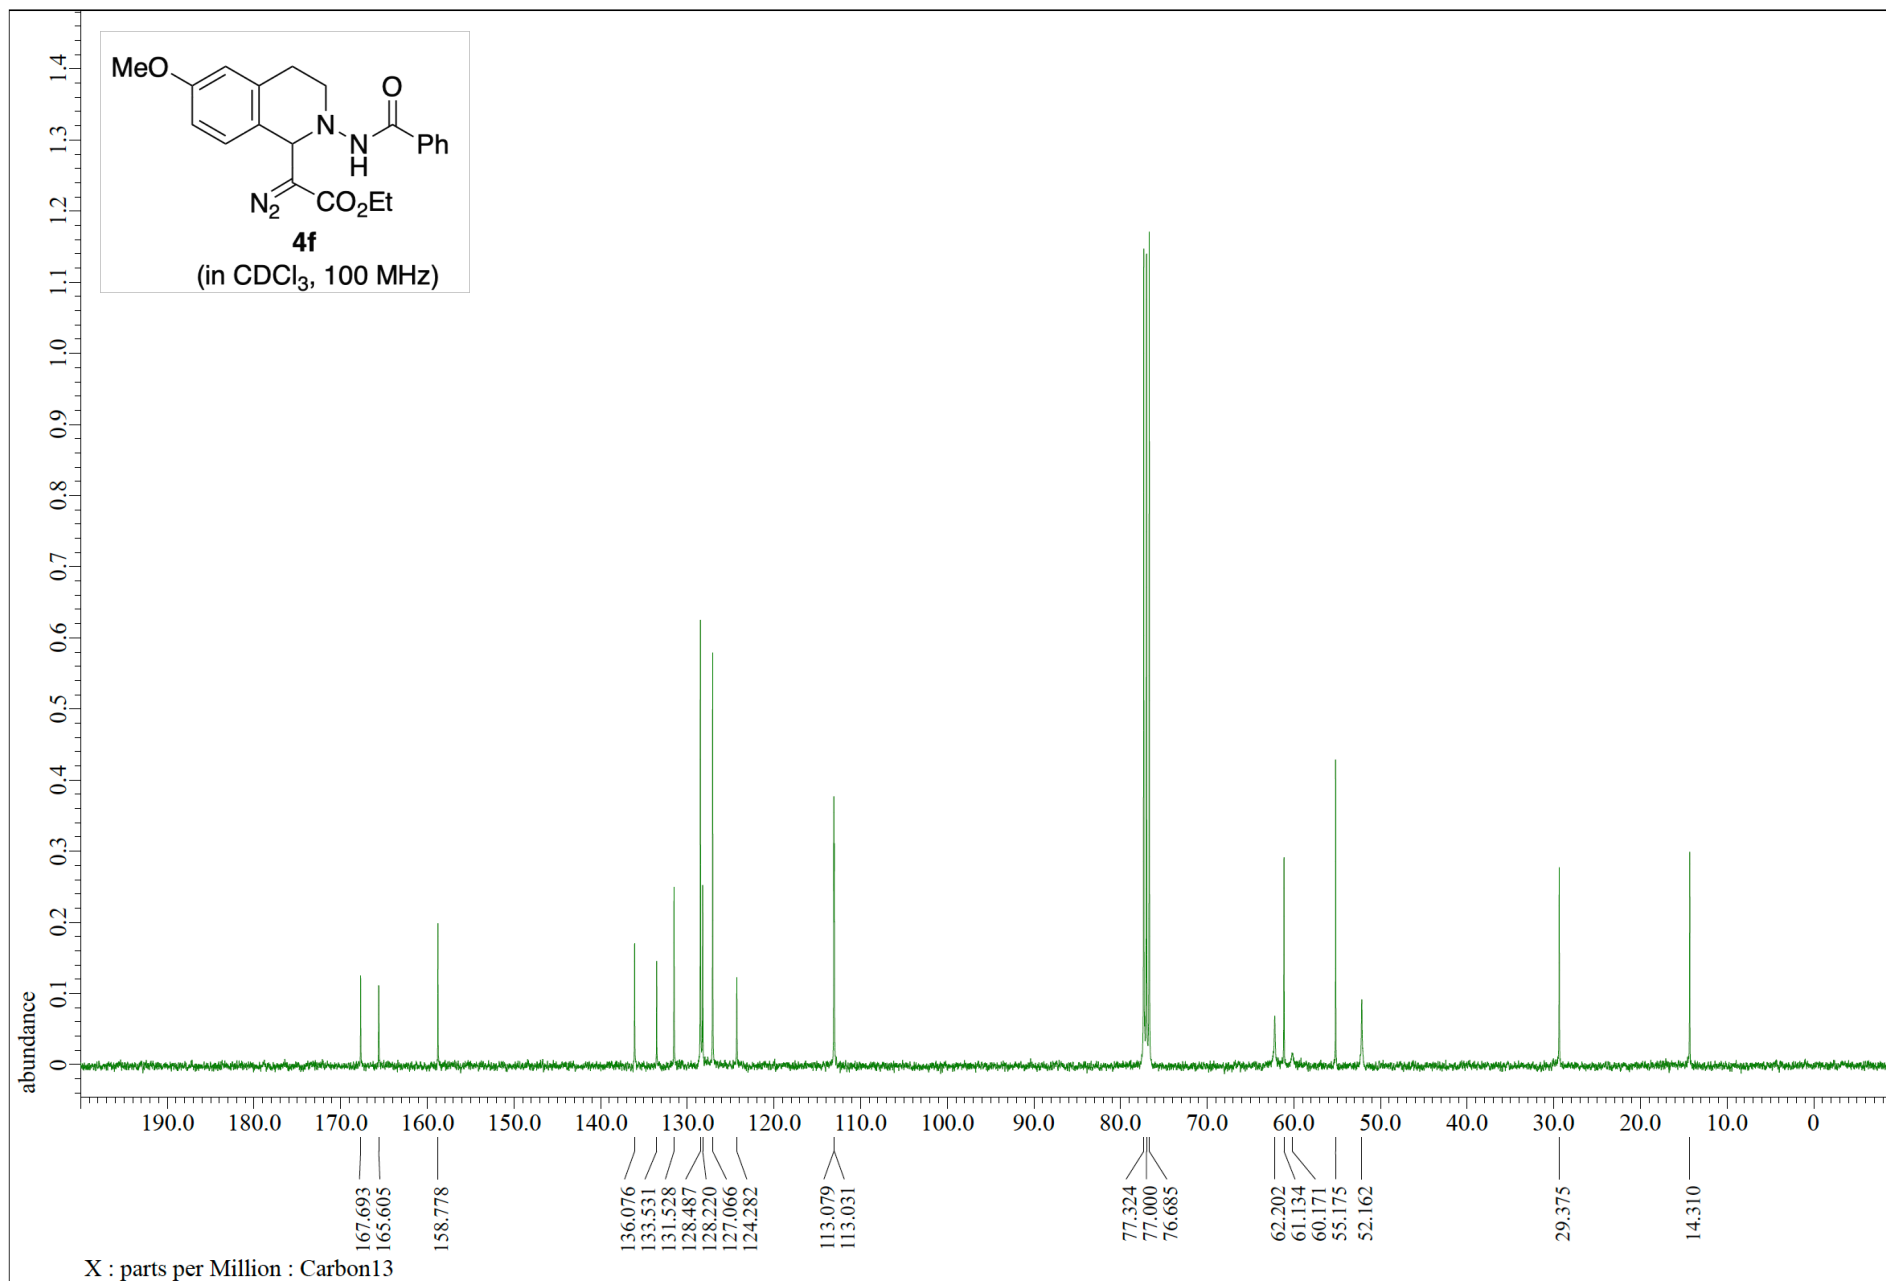

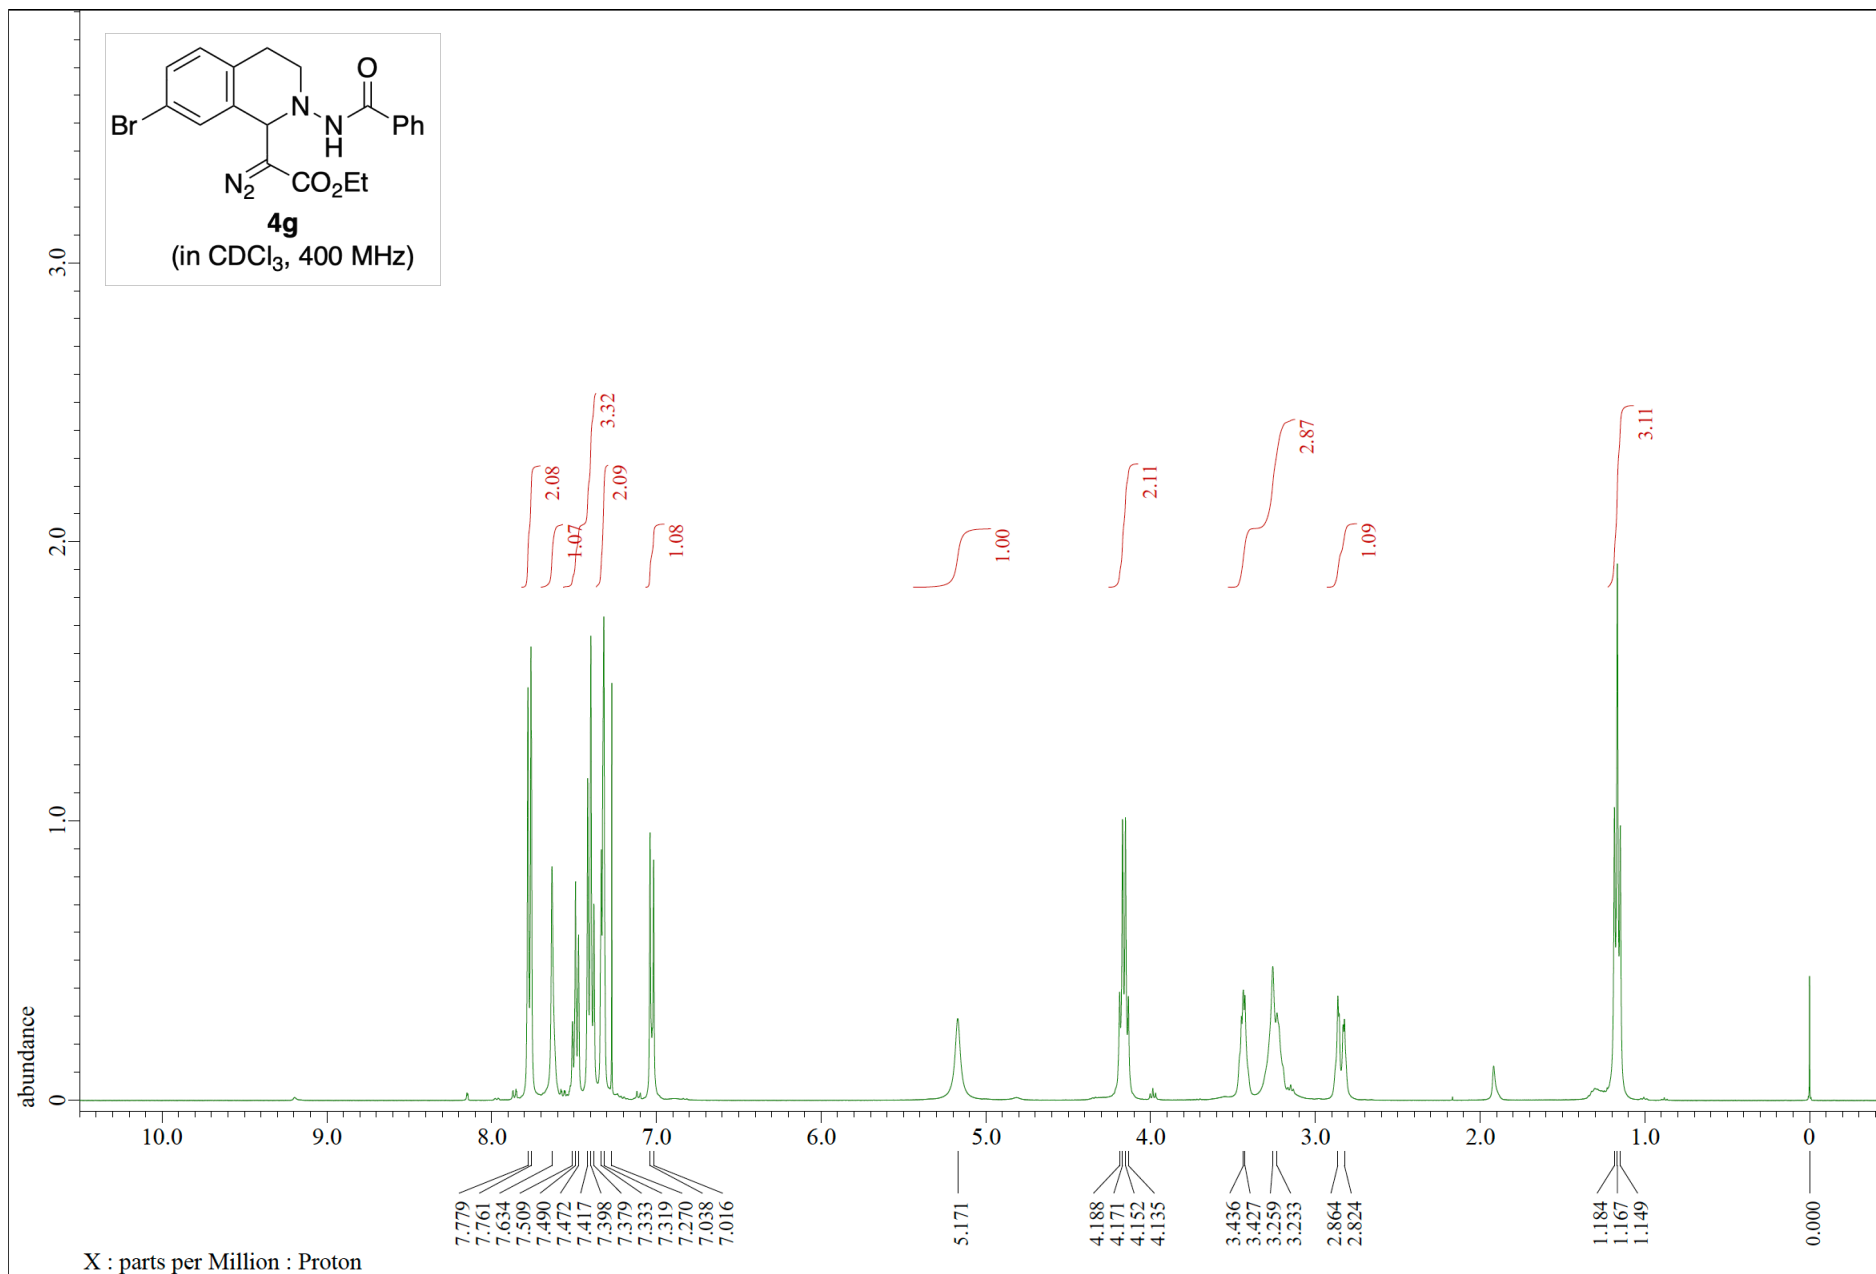

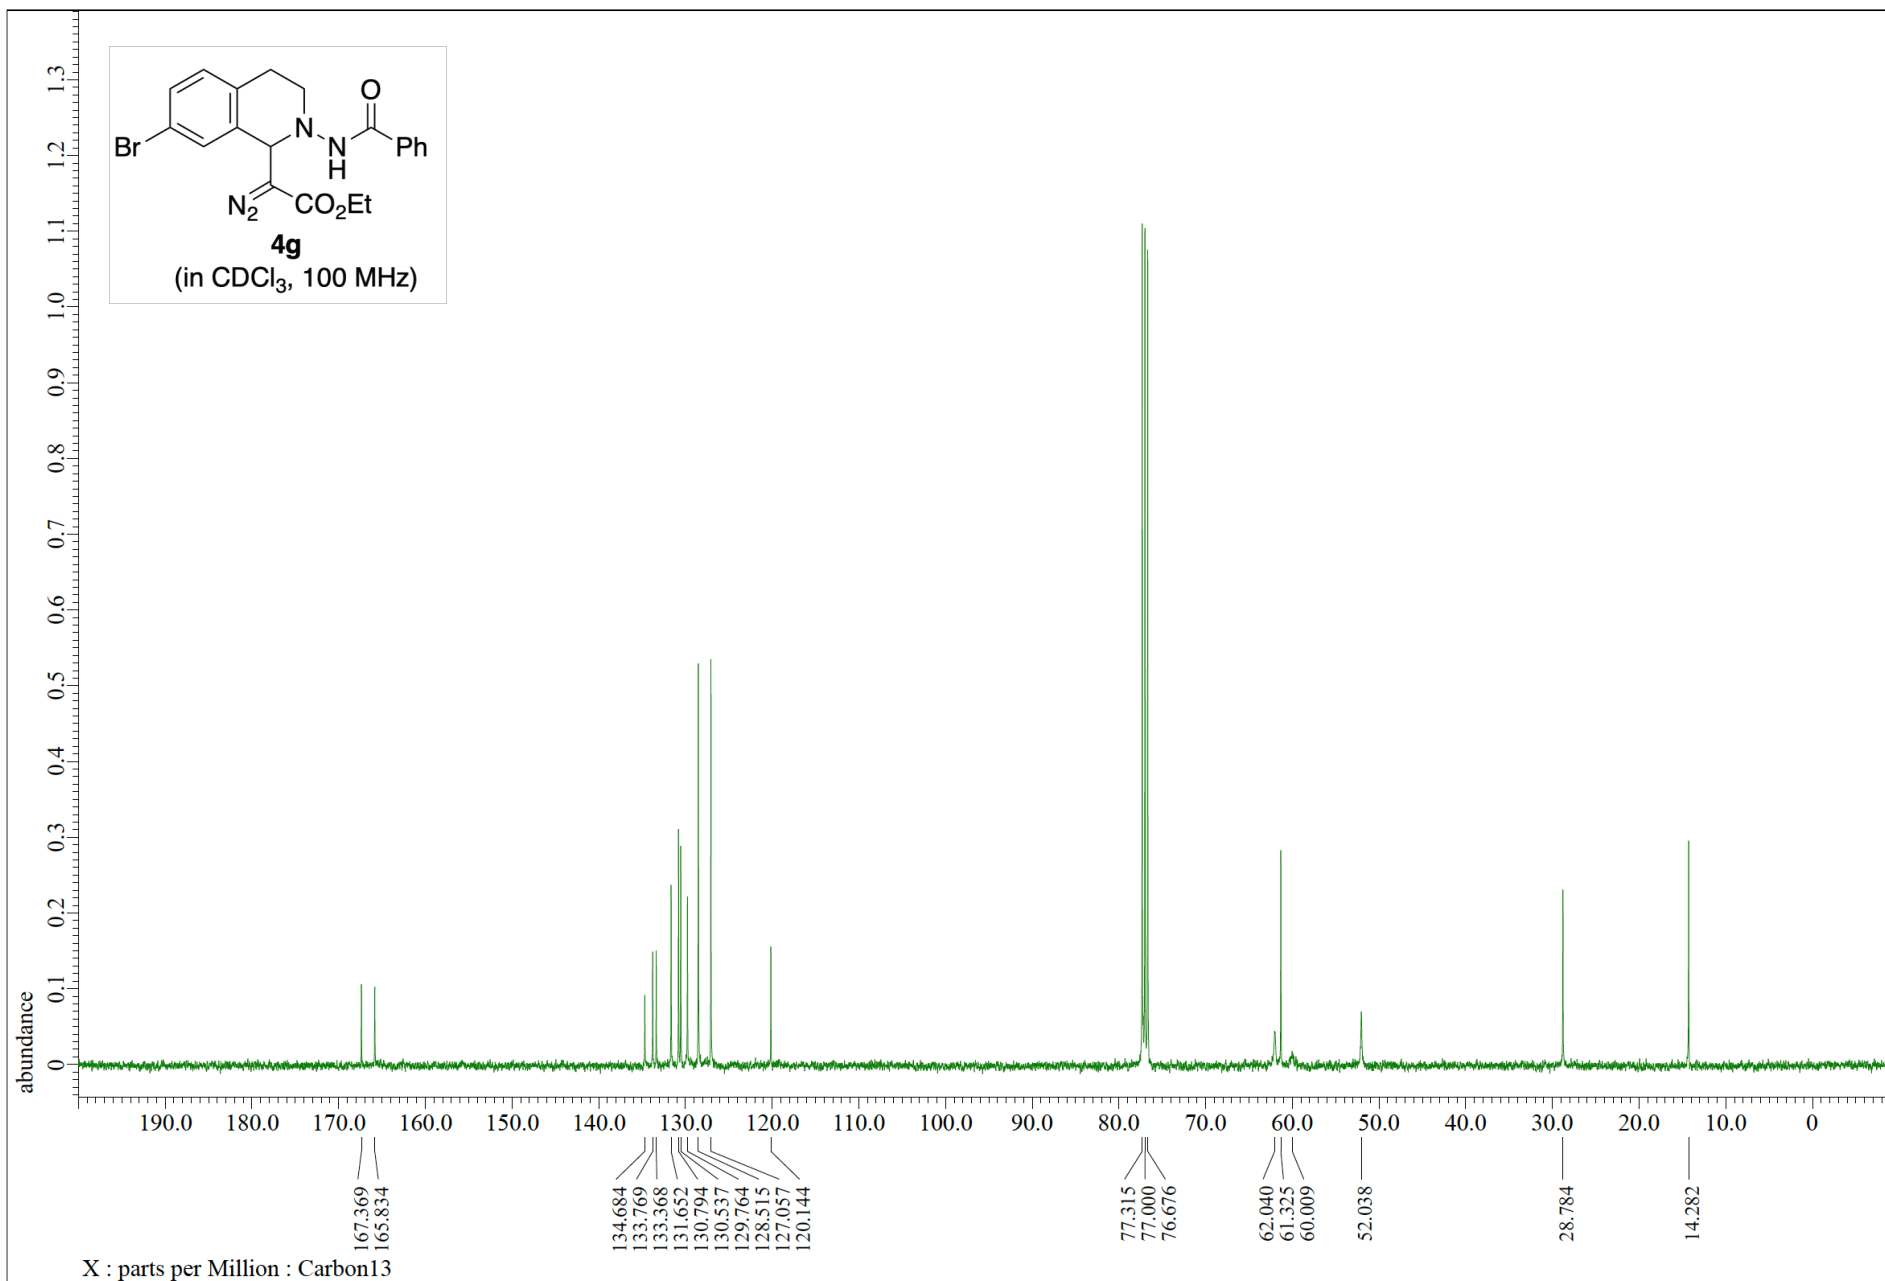

2)  $^1\text{H}$  and  $^{13}\text{C}$  NMR spectra of 3-benzazepine derivatives **5a-5g**

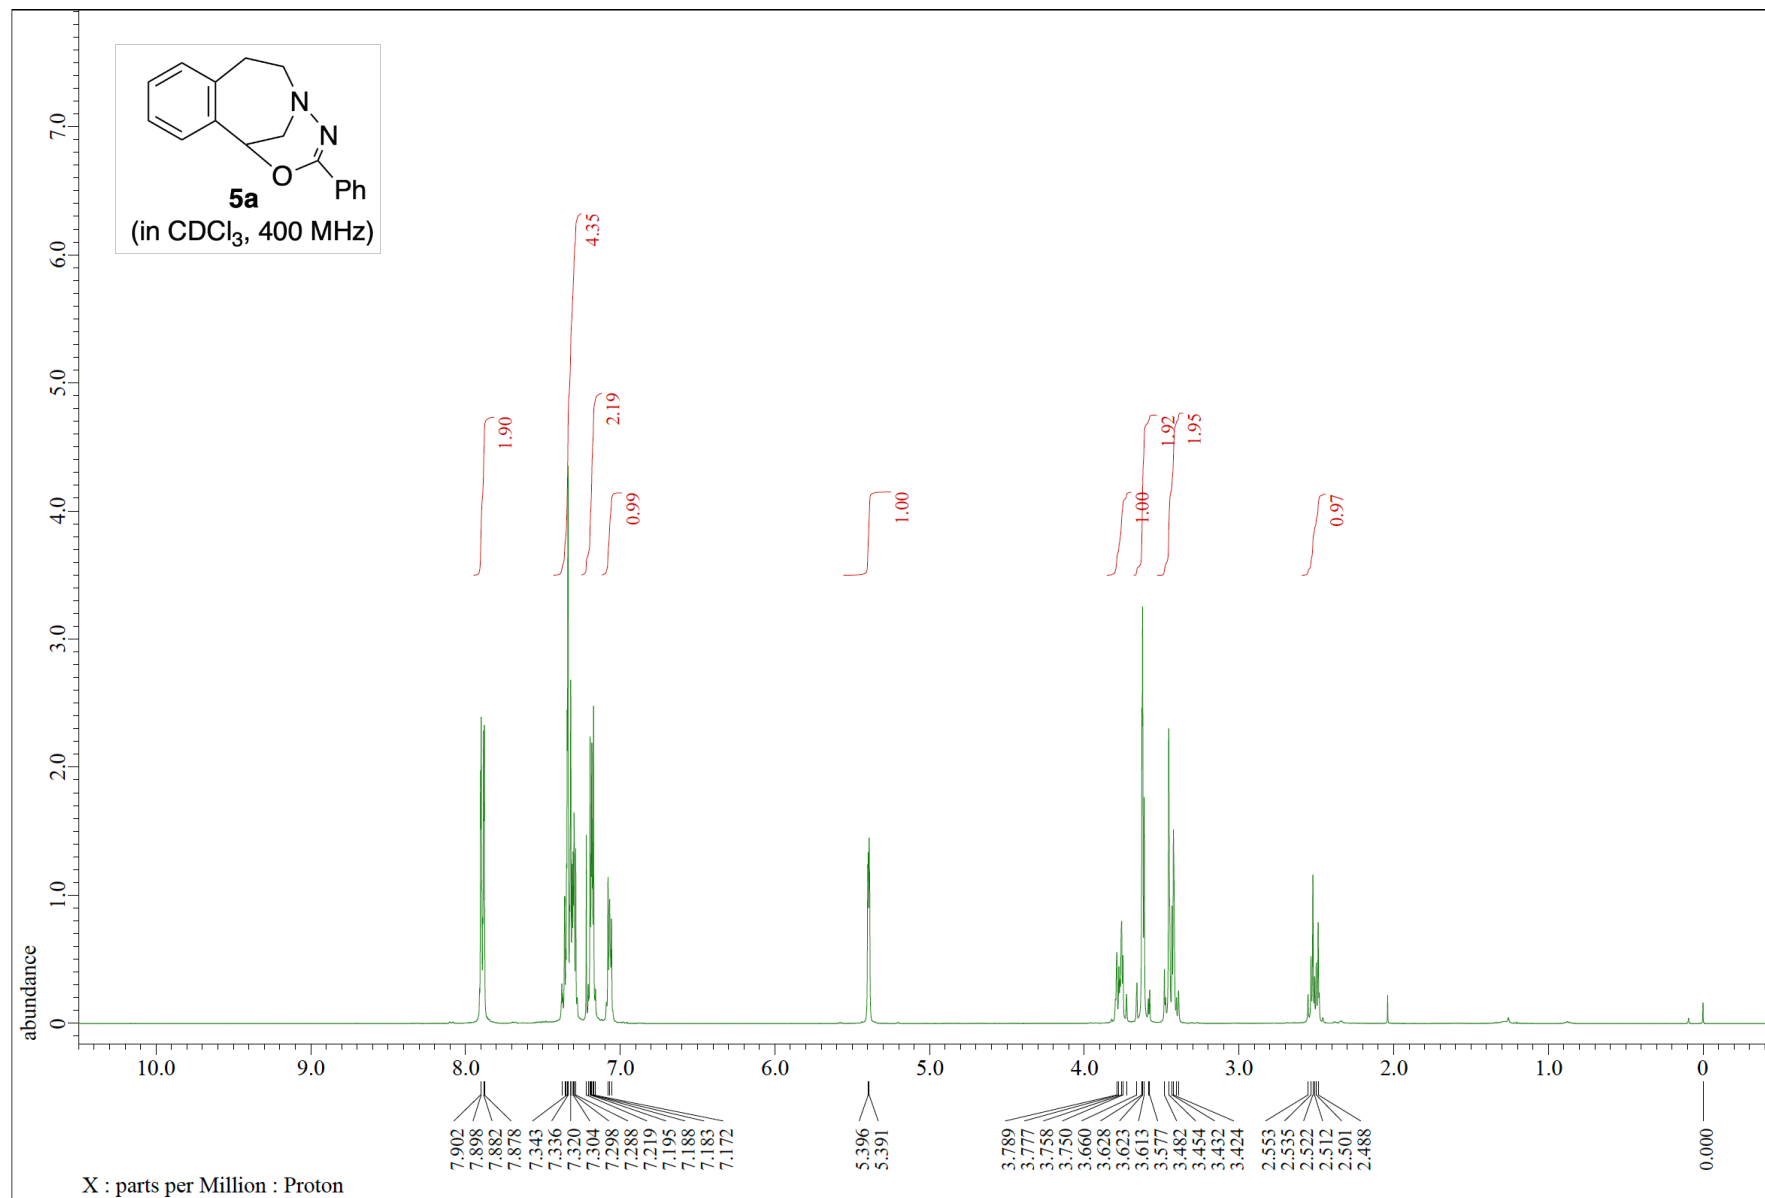

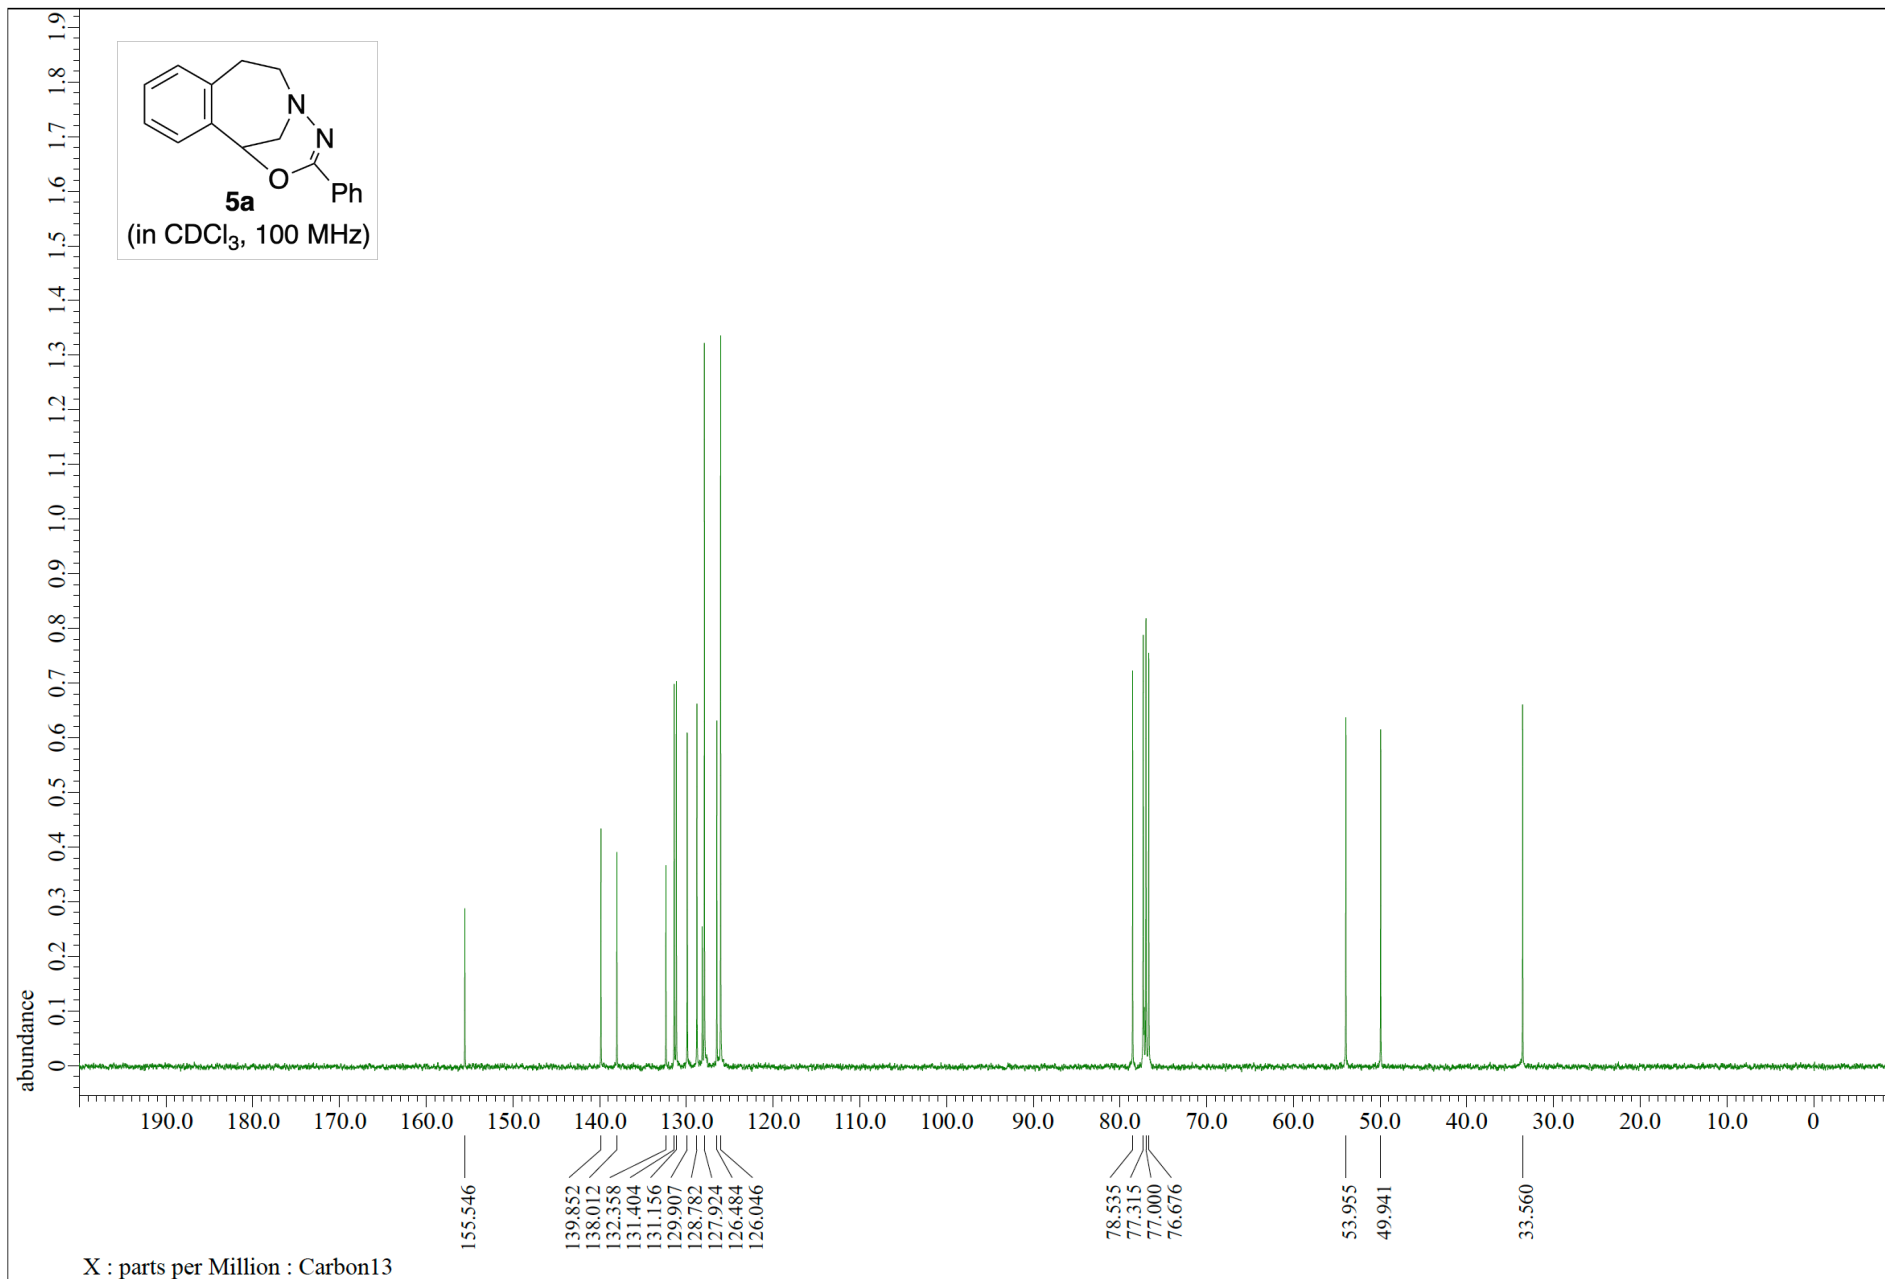

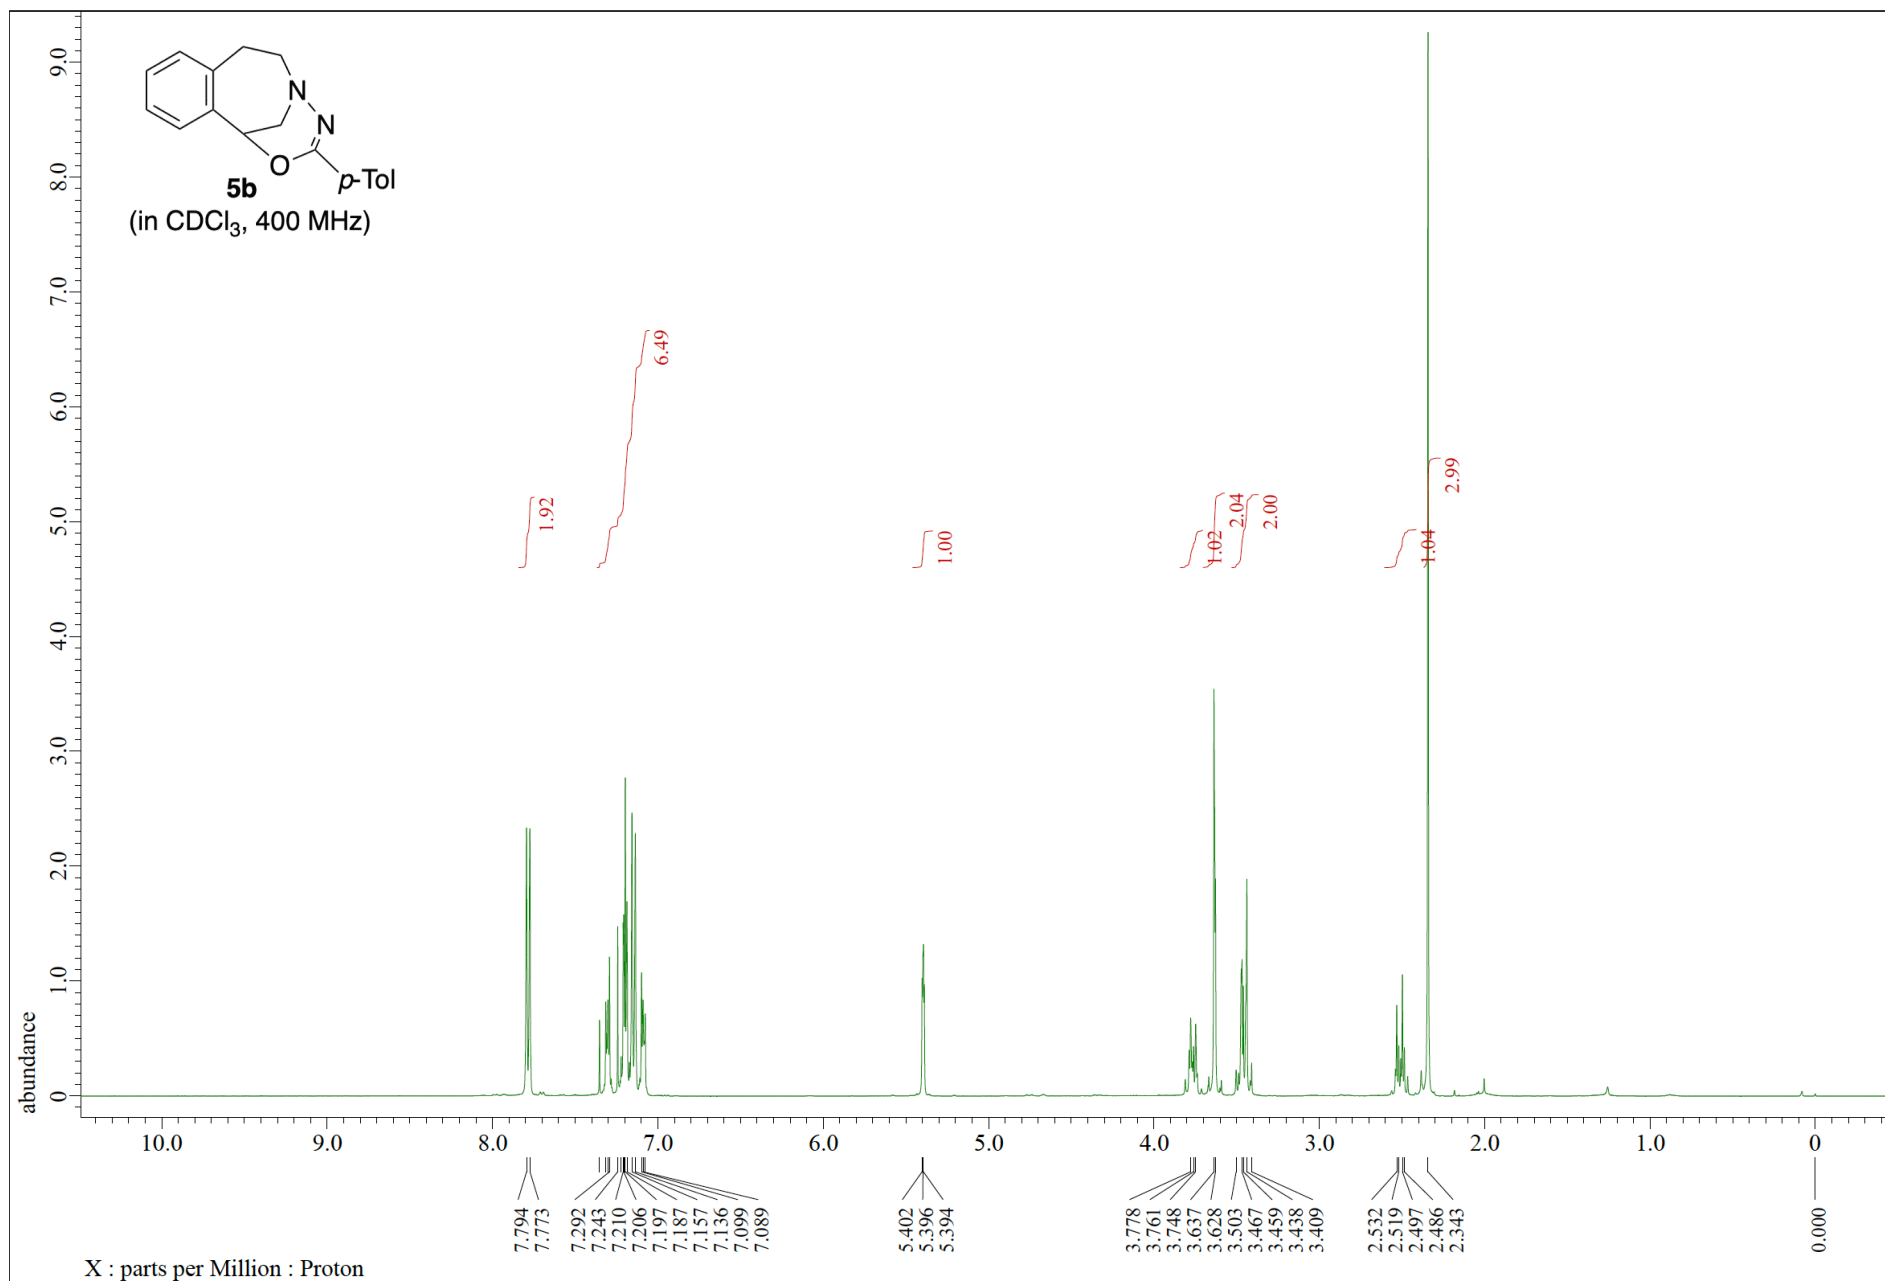



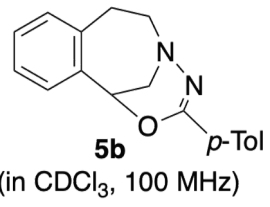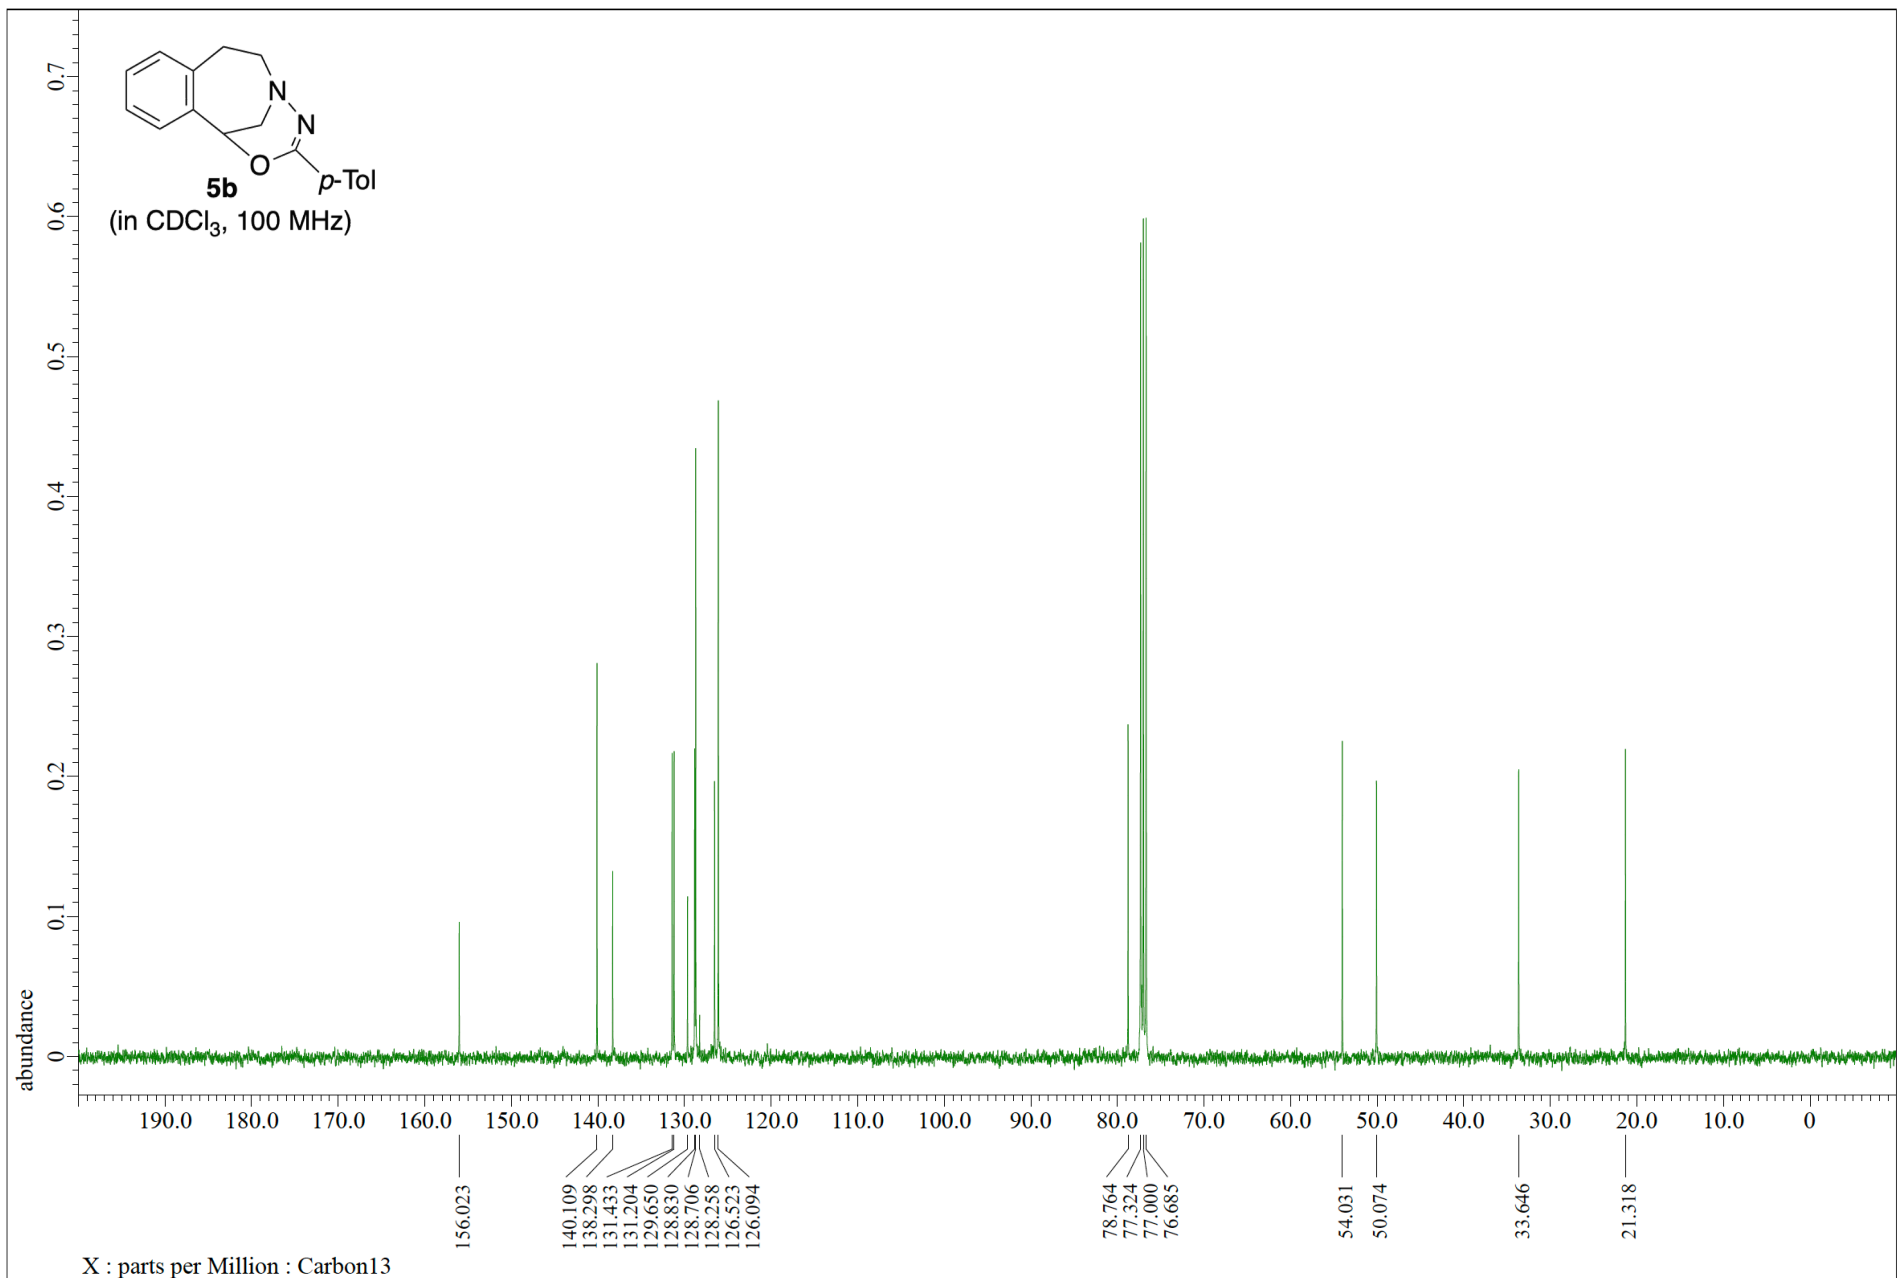

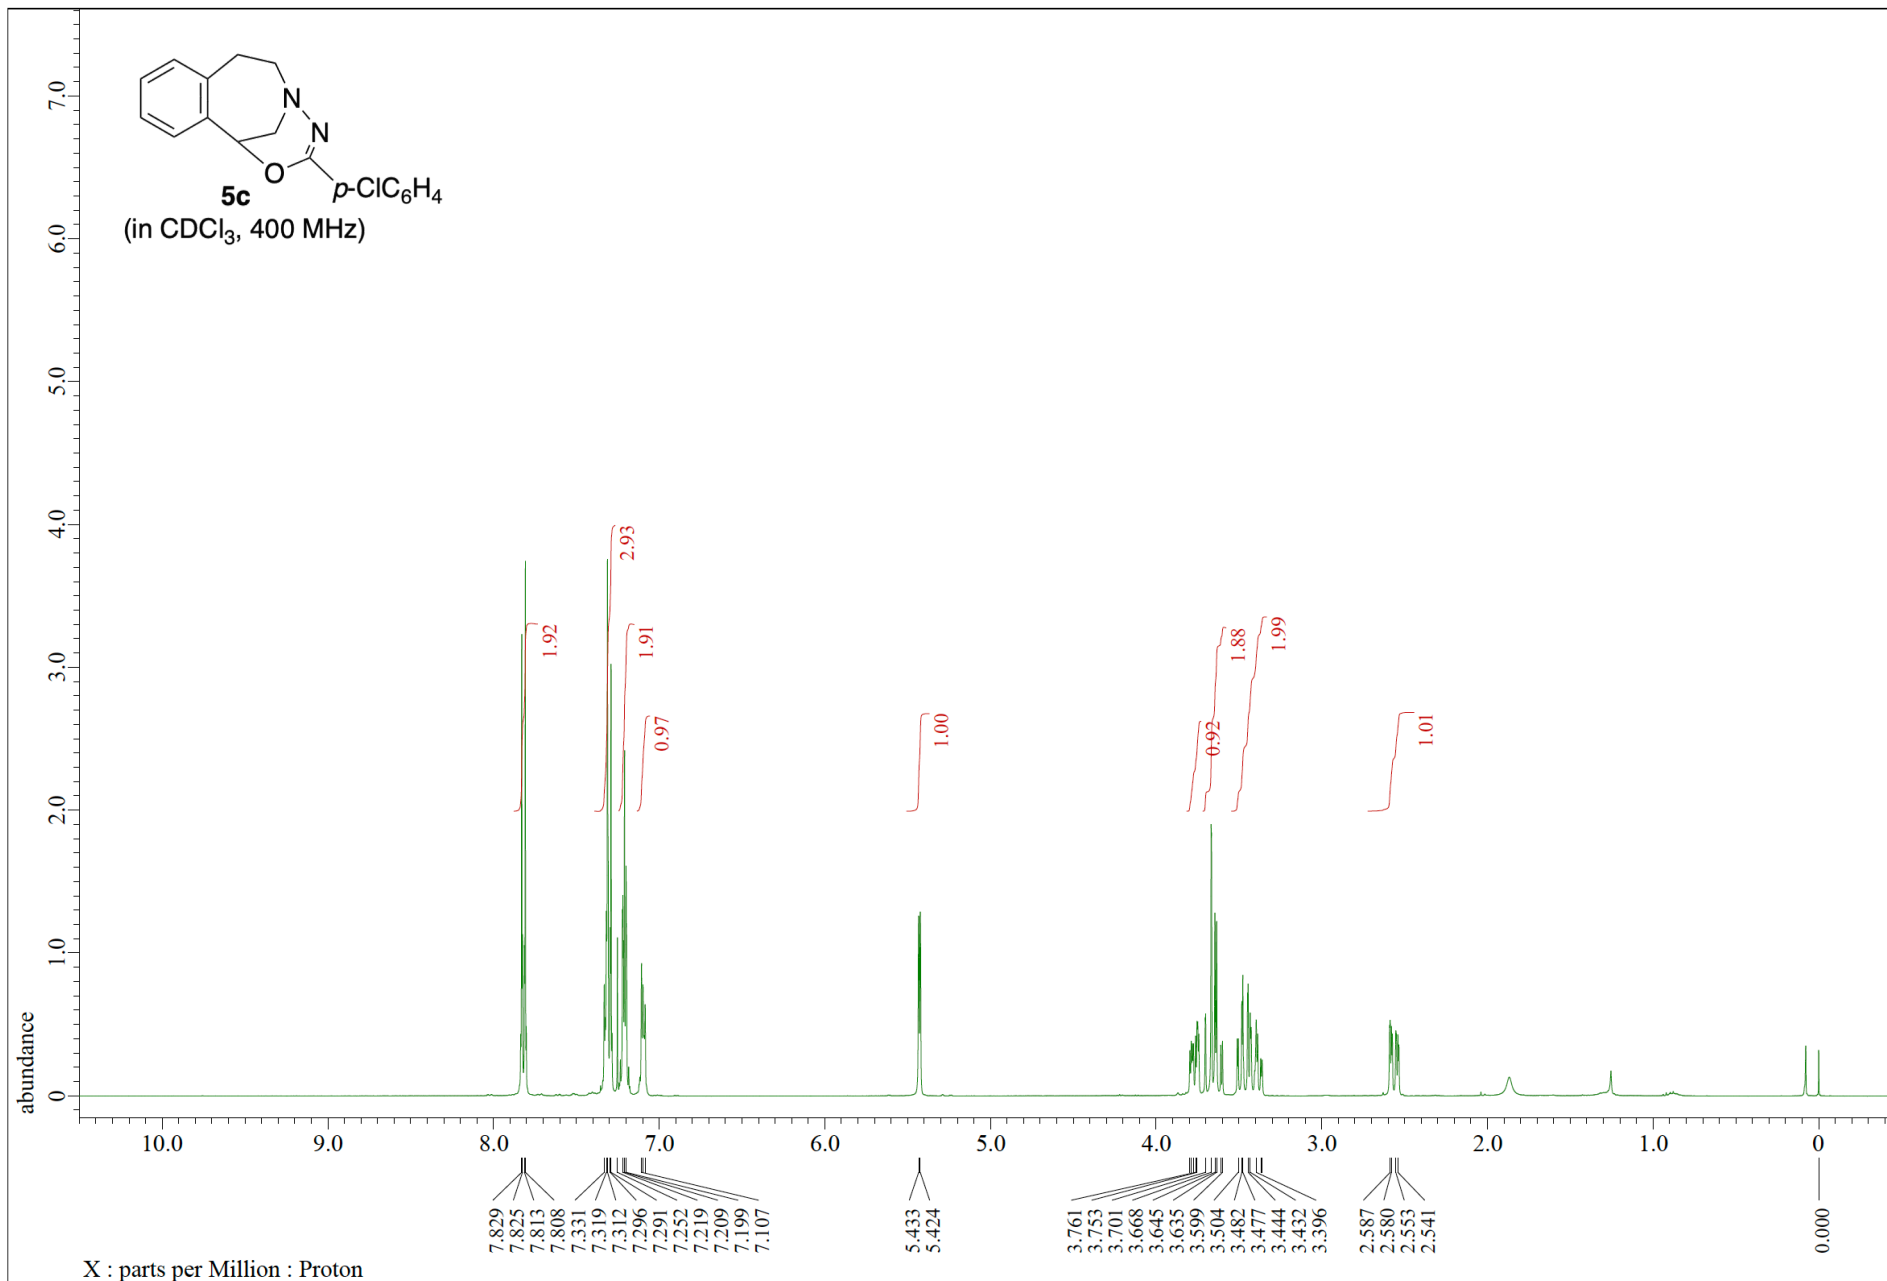

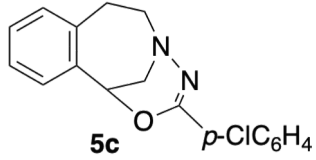

(in CDCl<sub>3</sub>, 100 MHz)

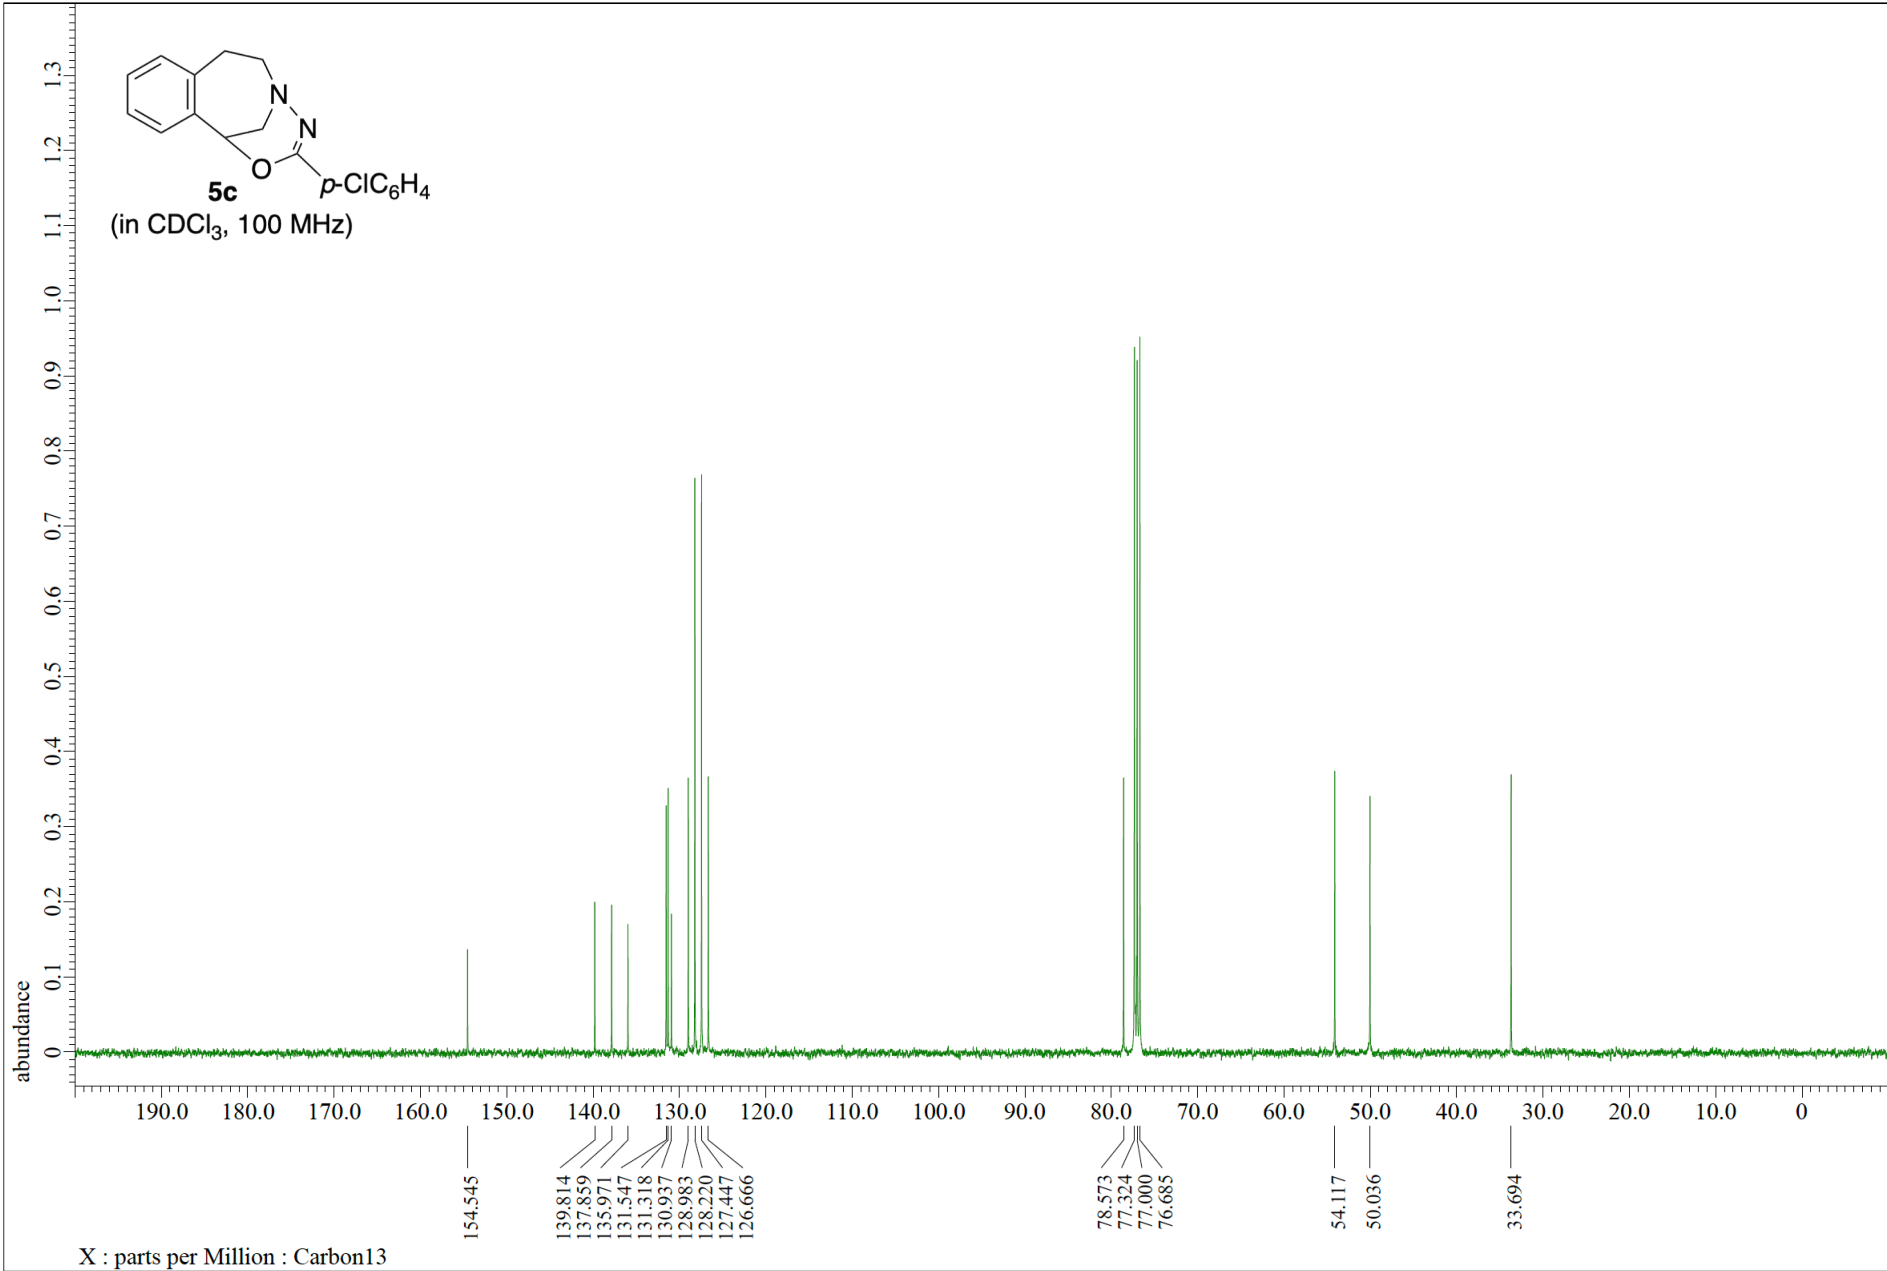

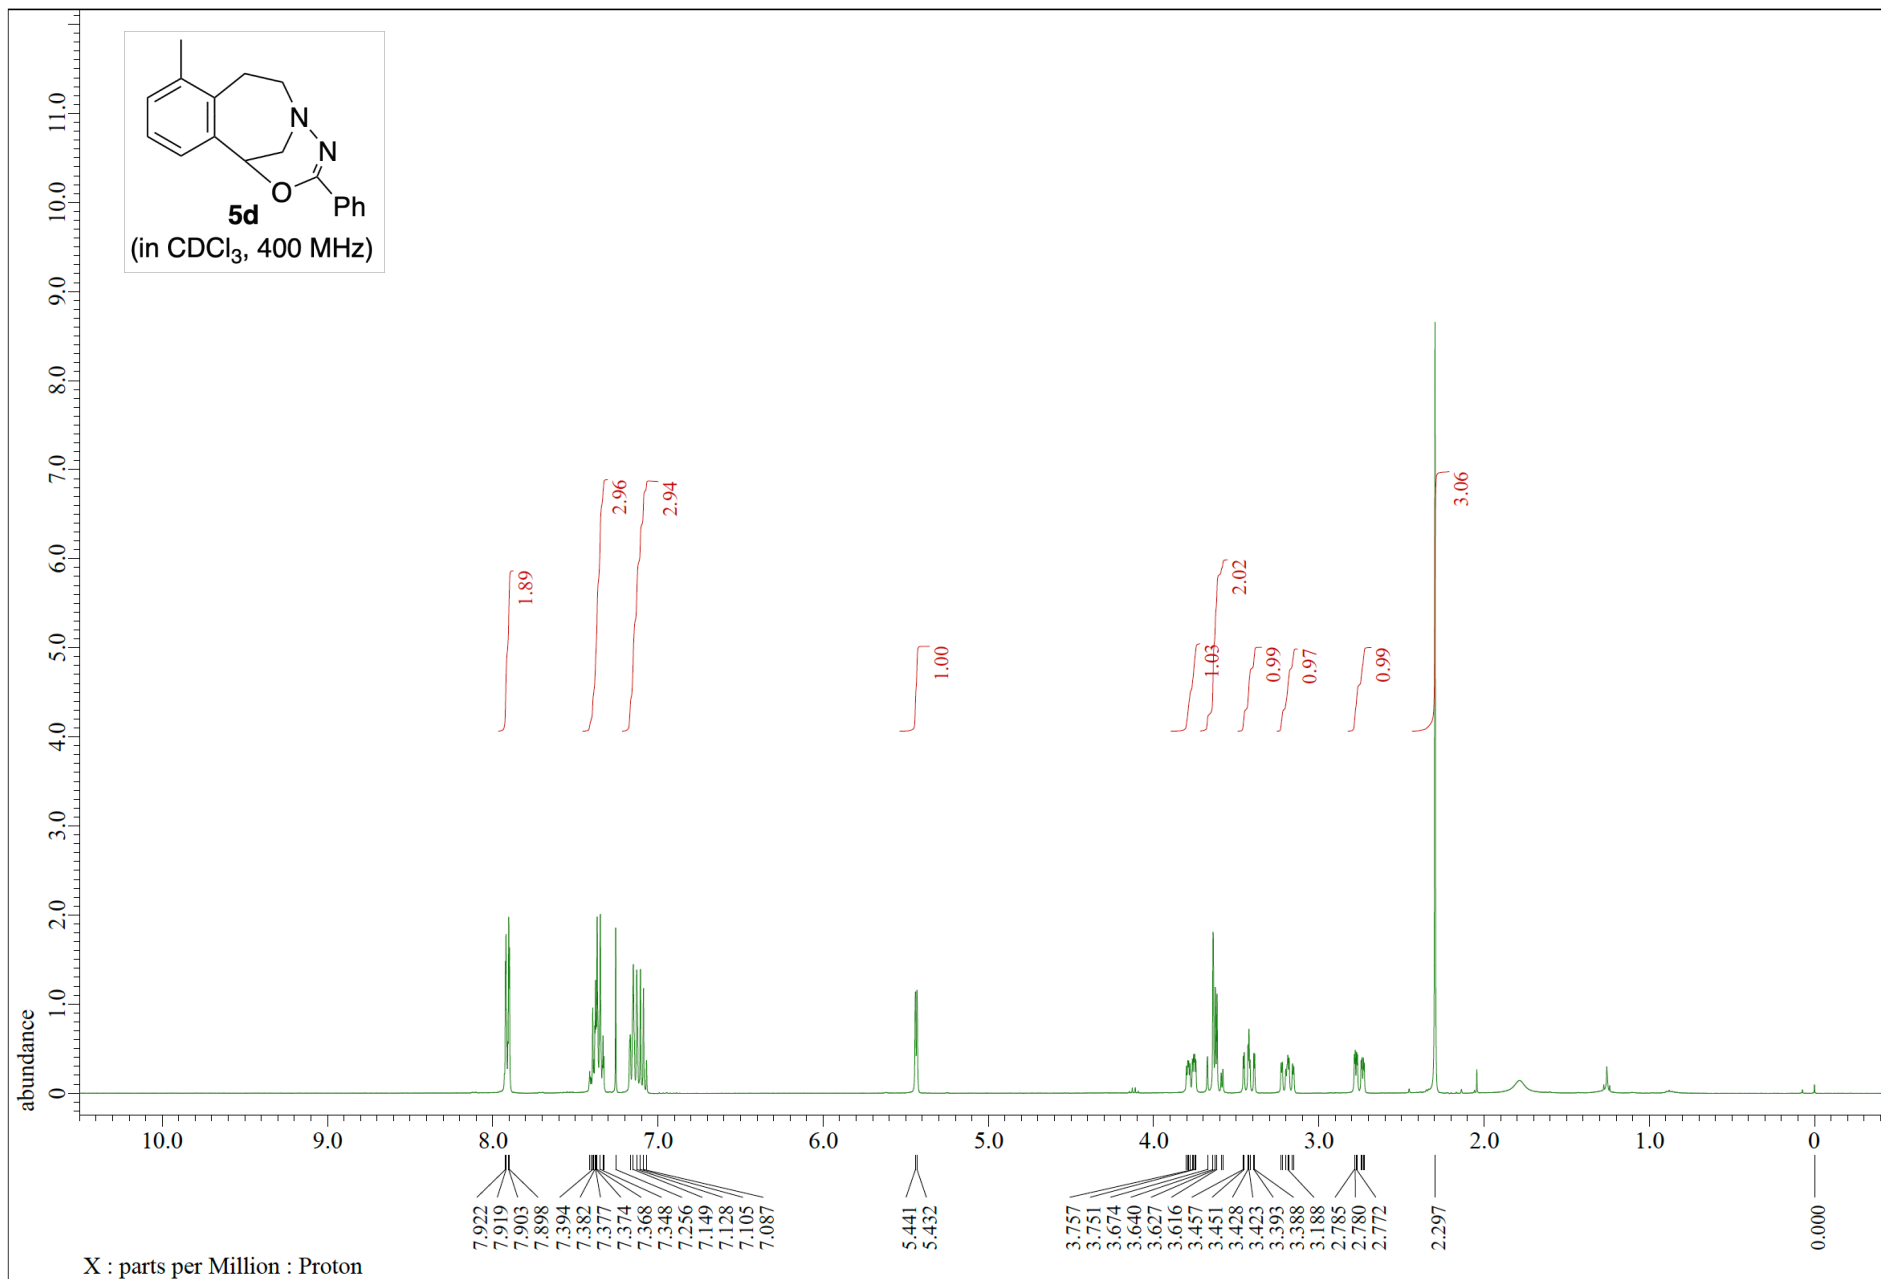

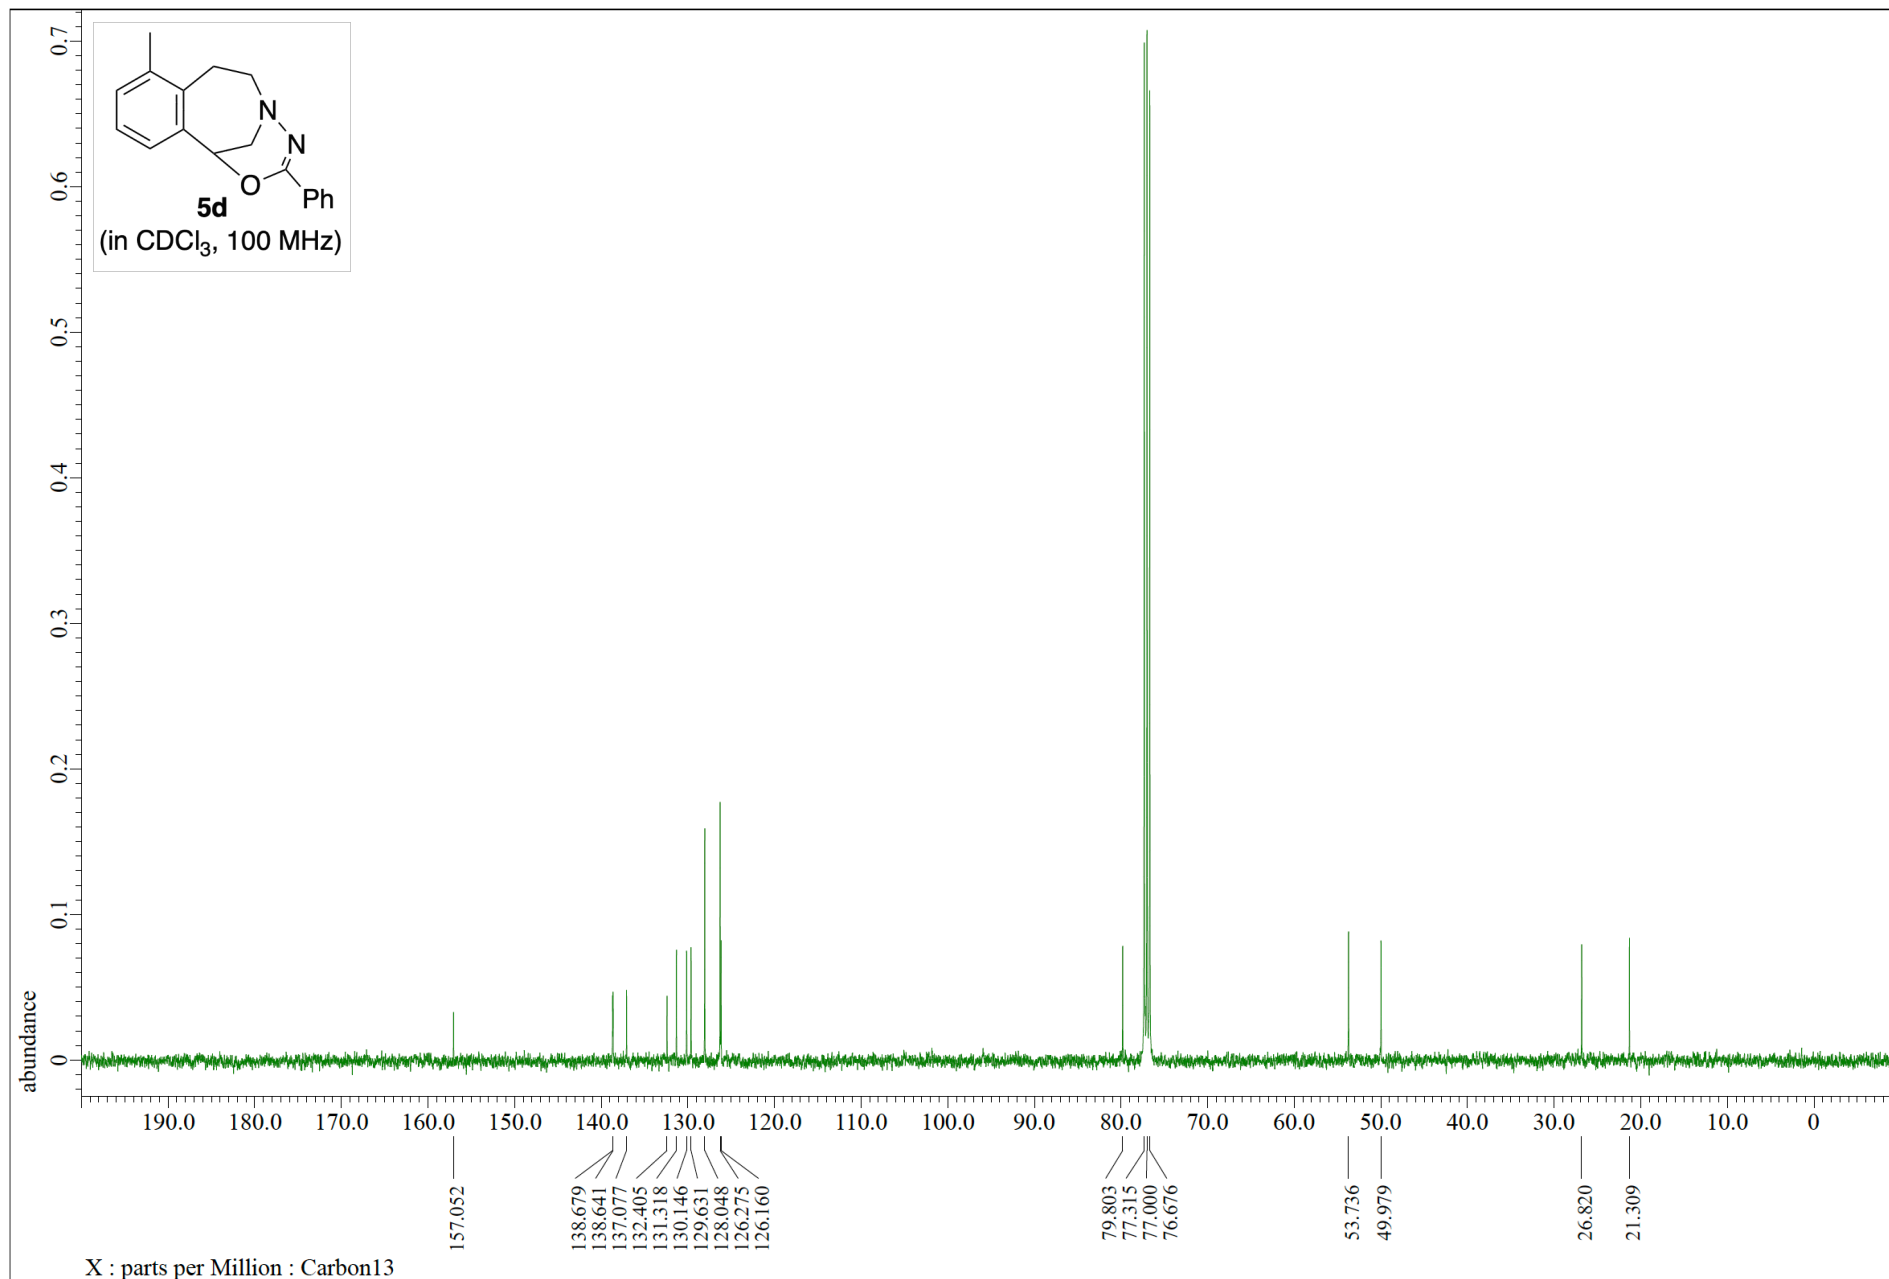

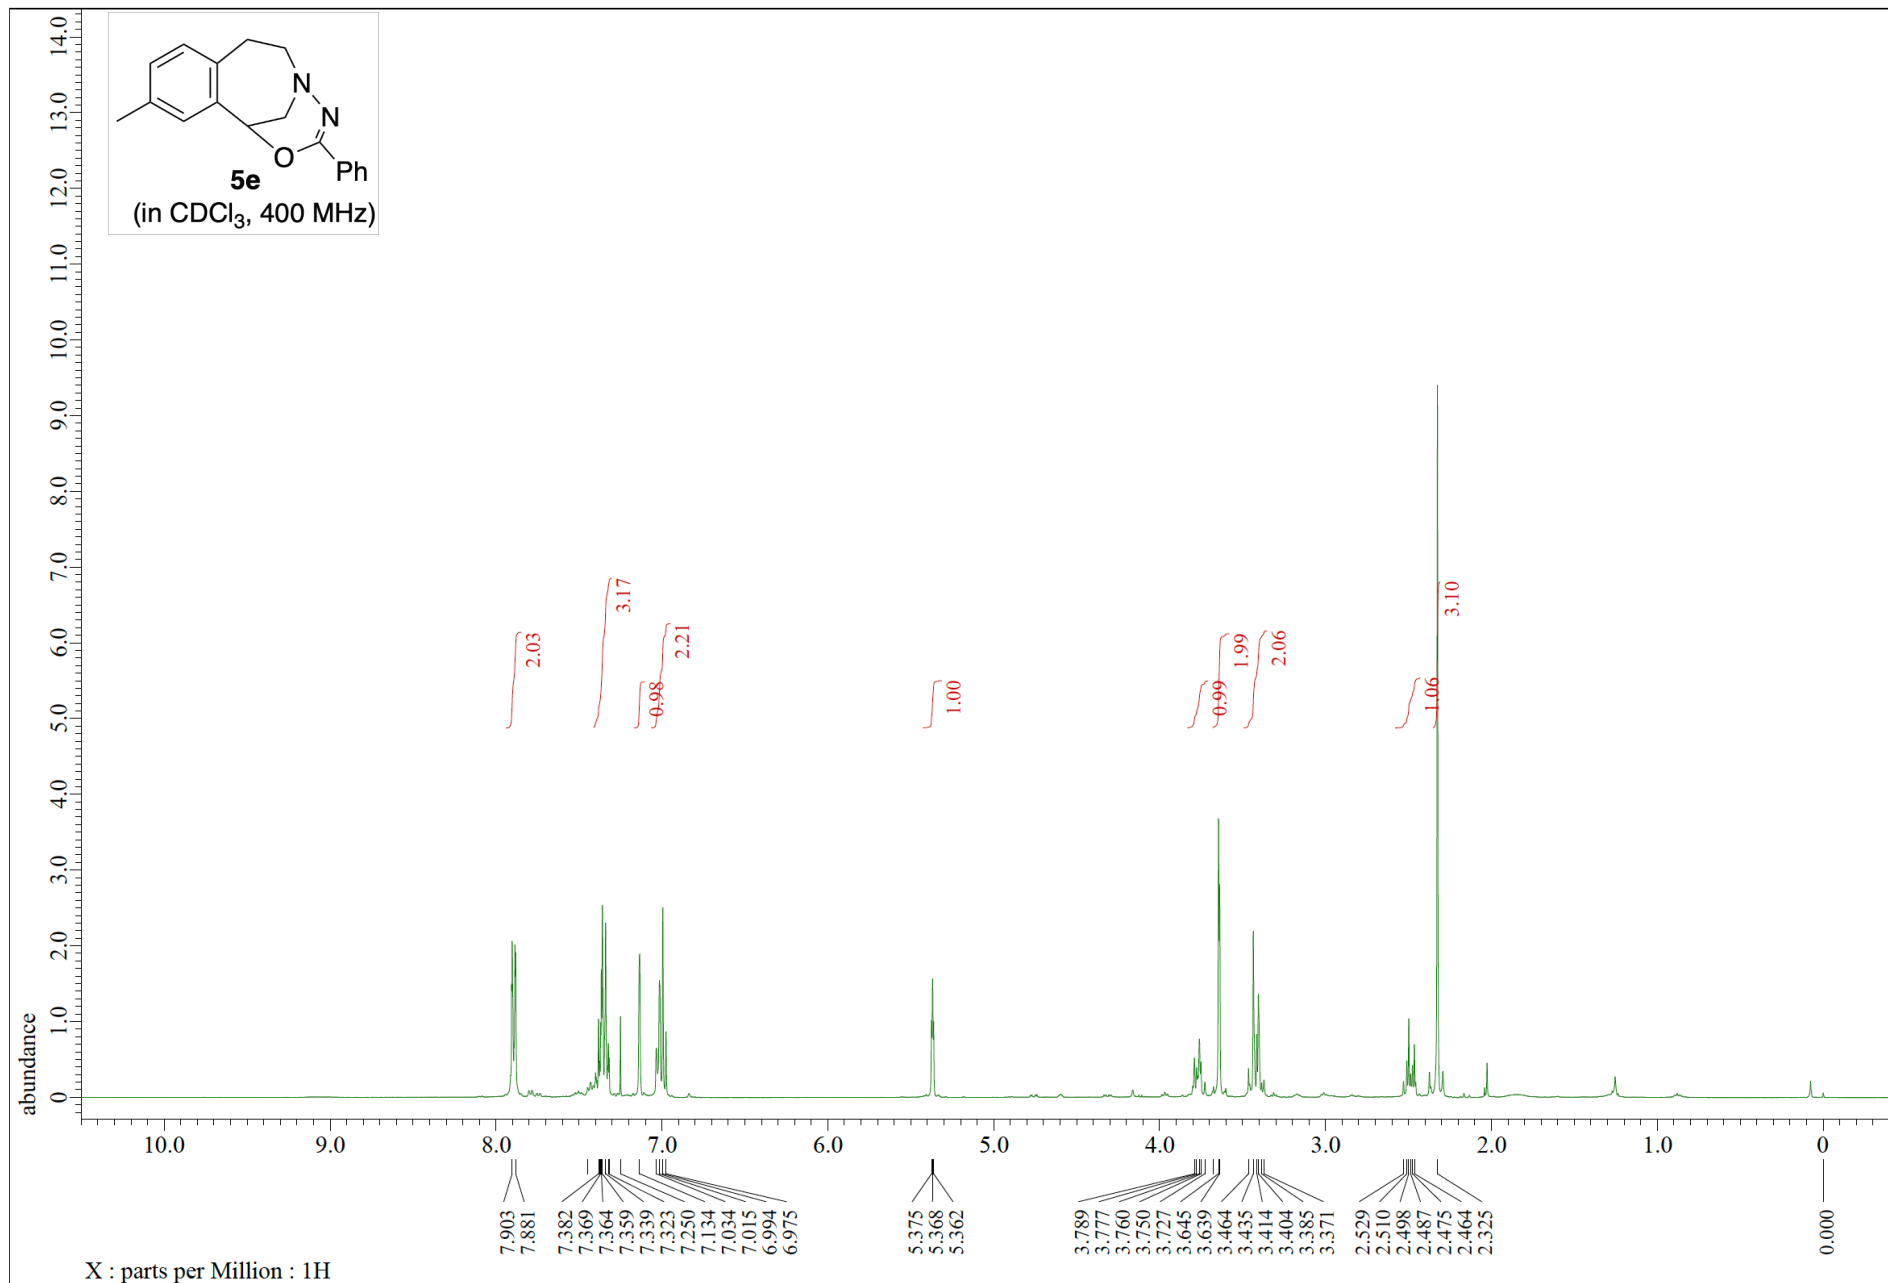

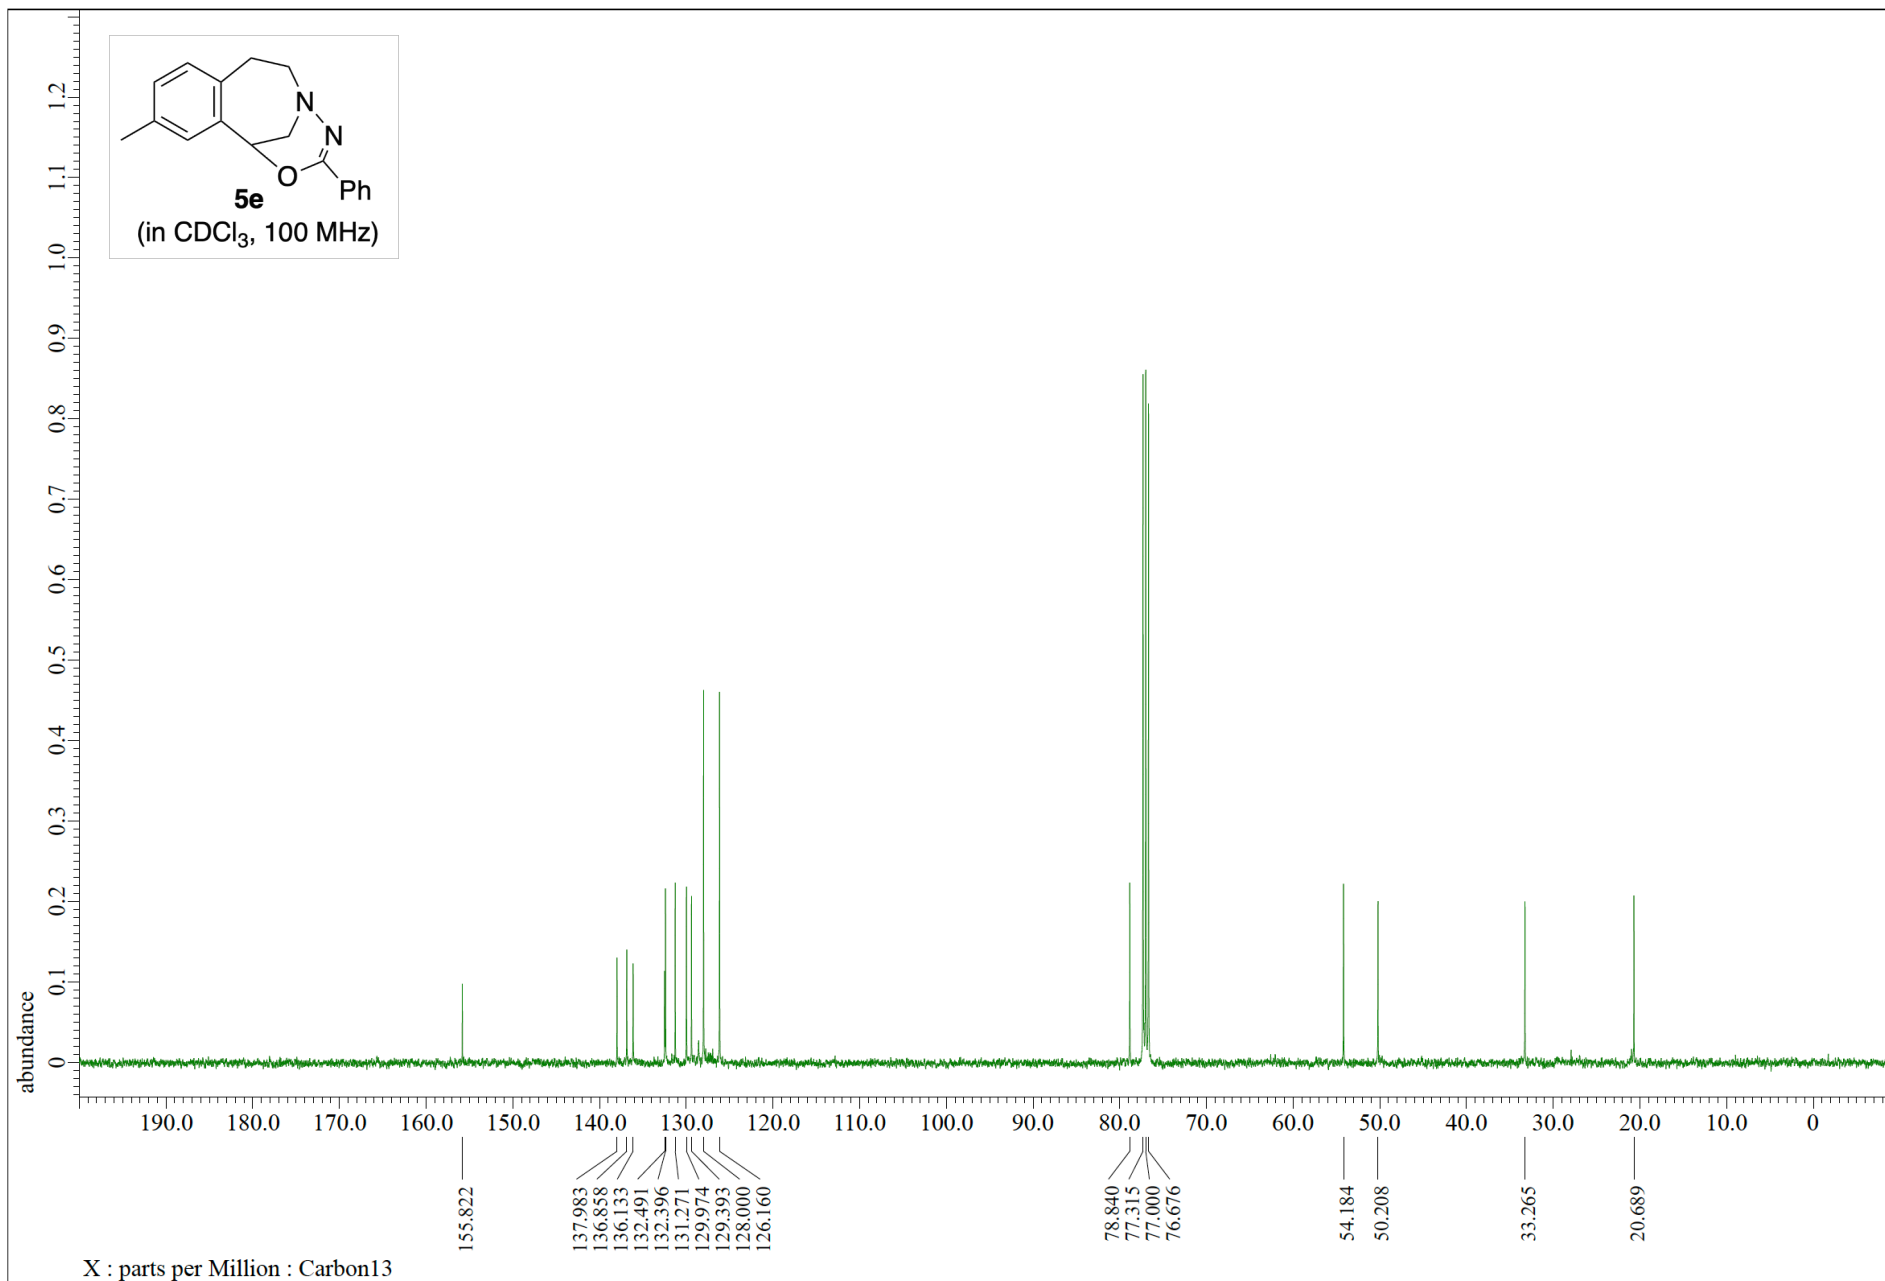

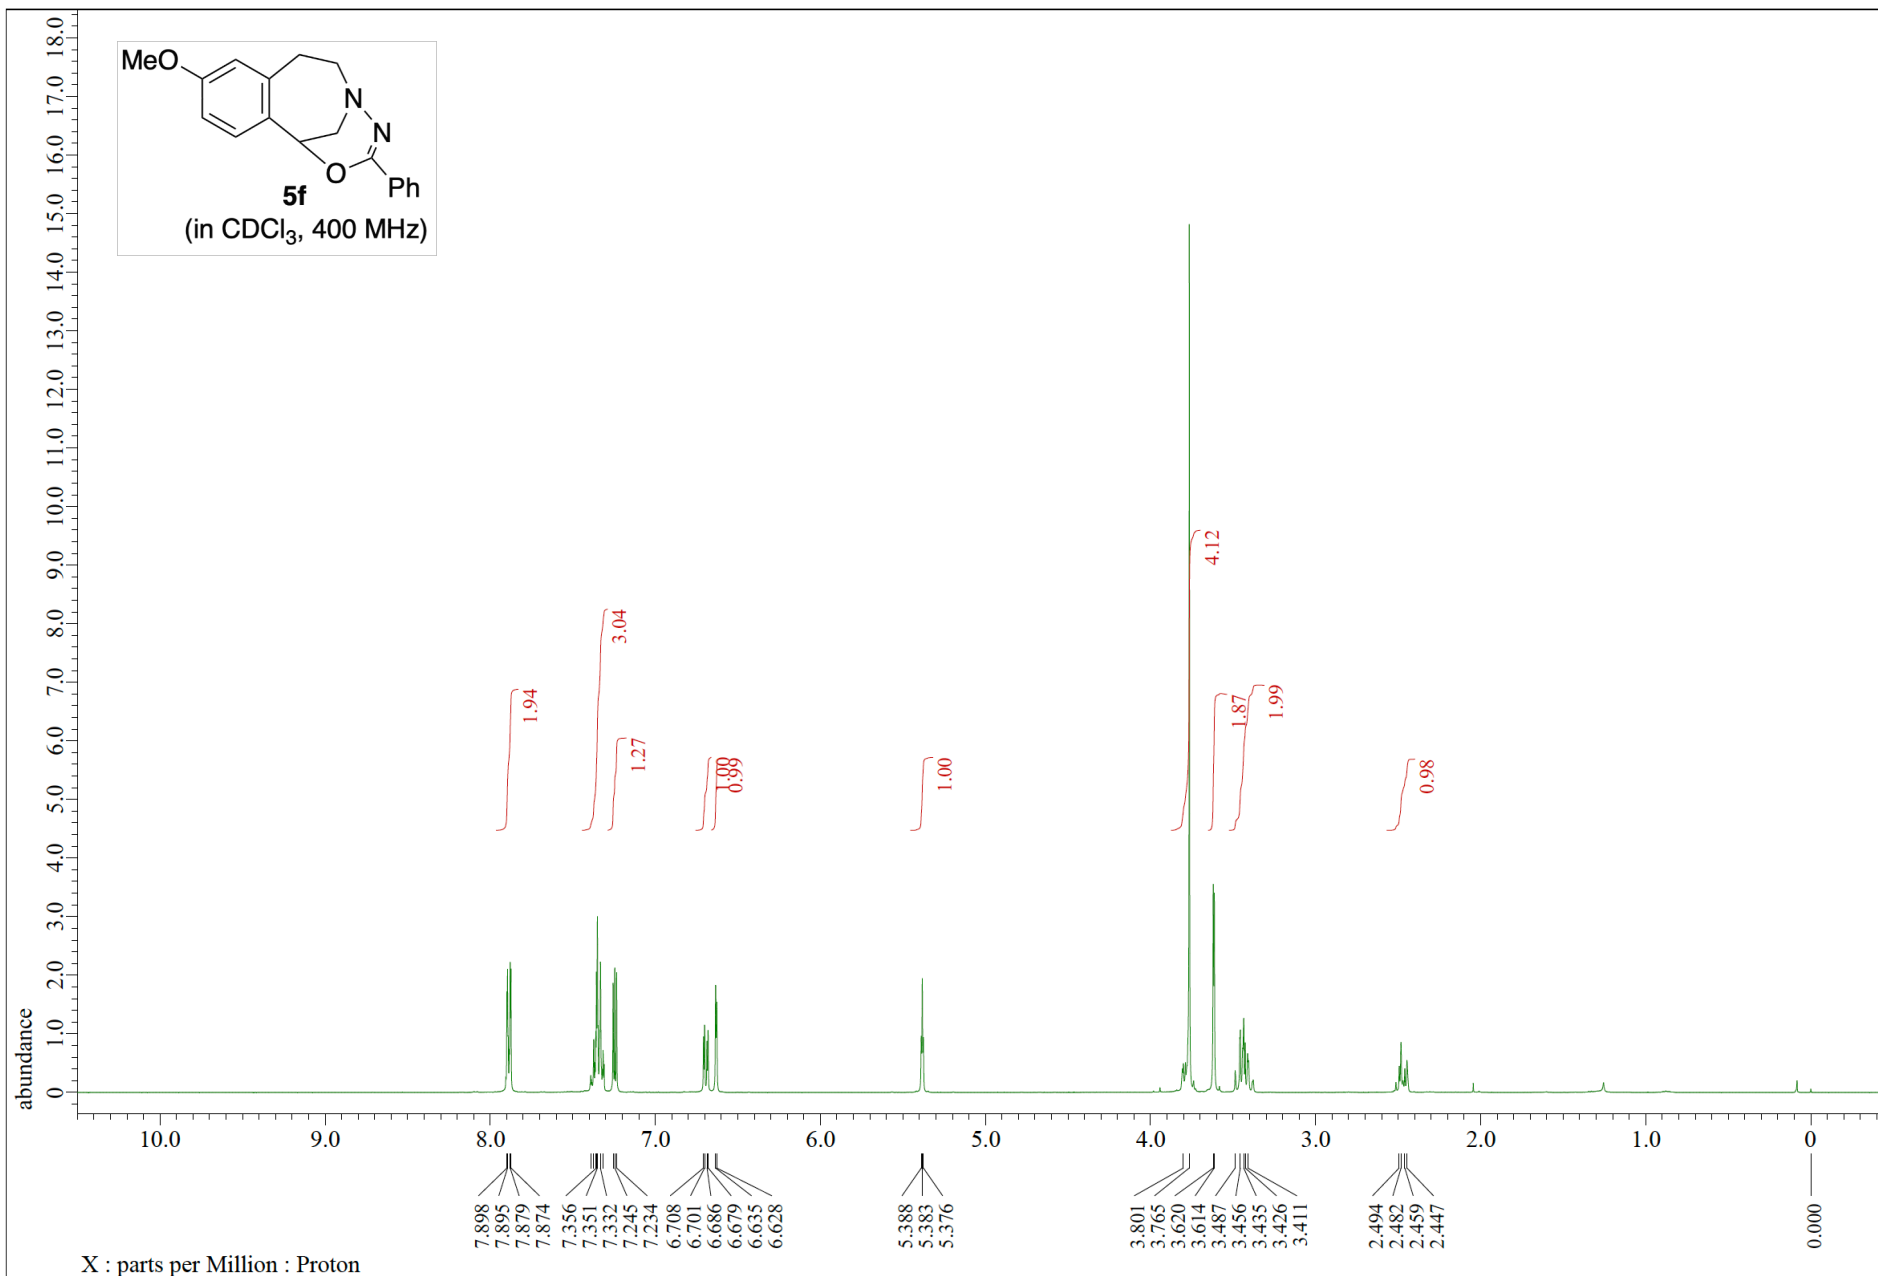



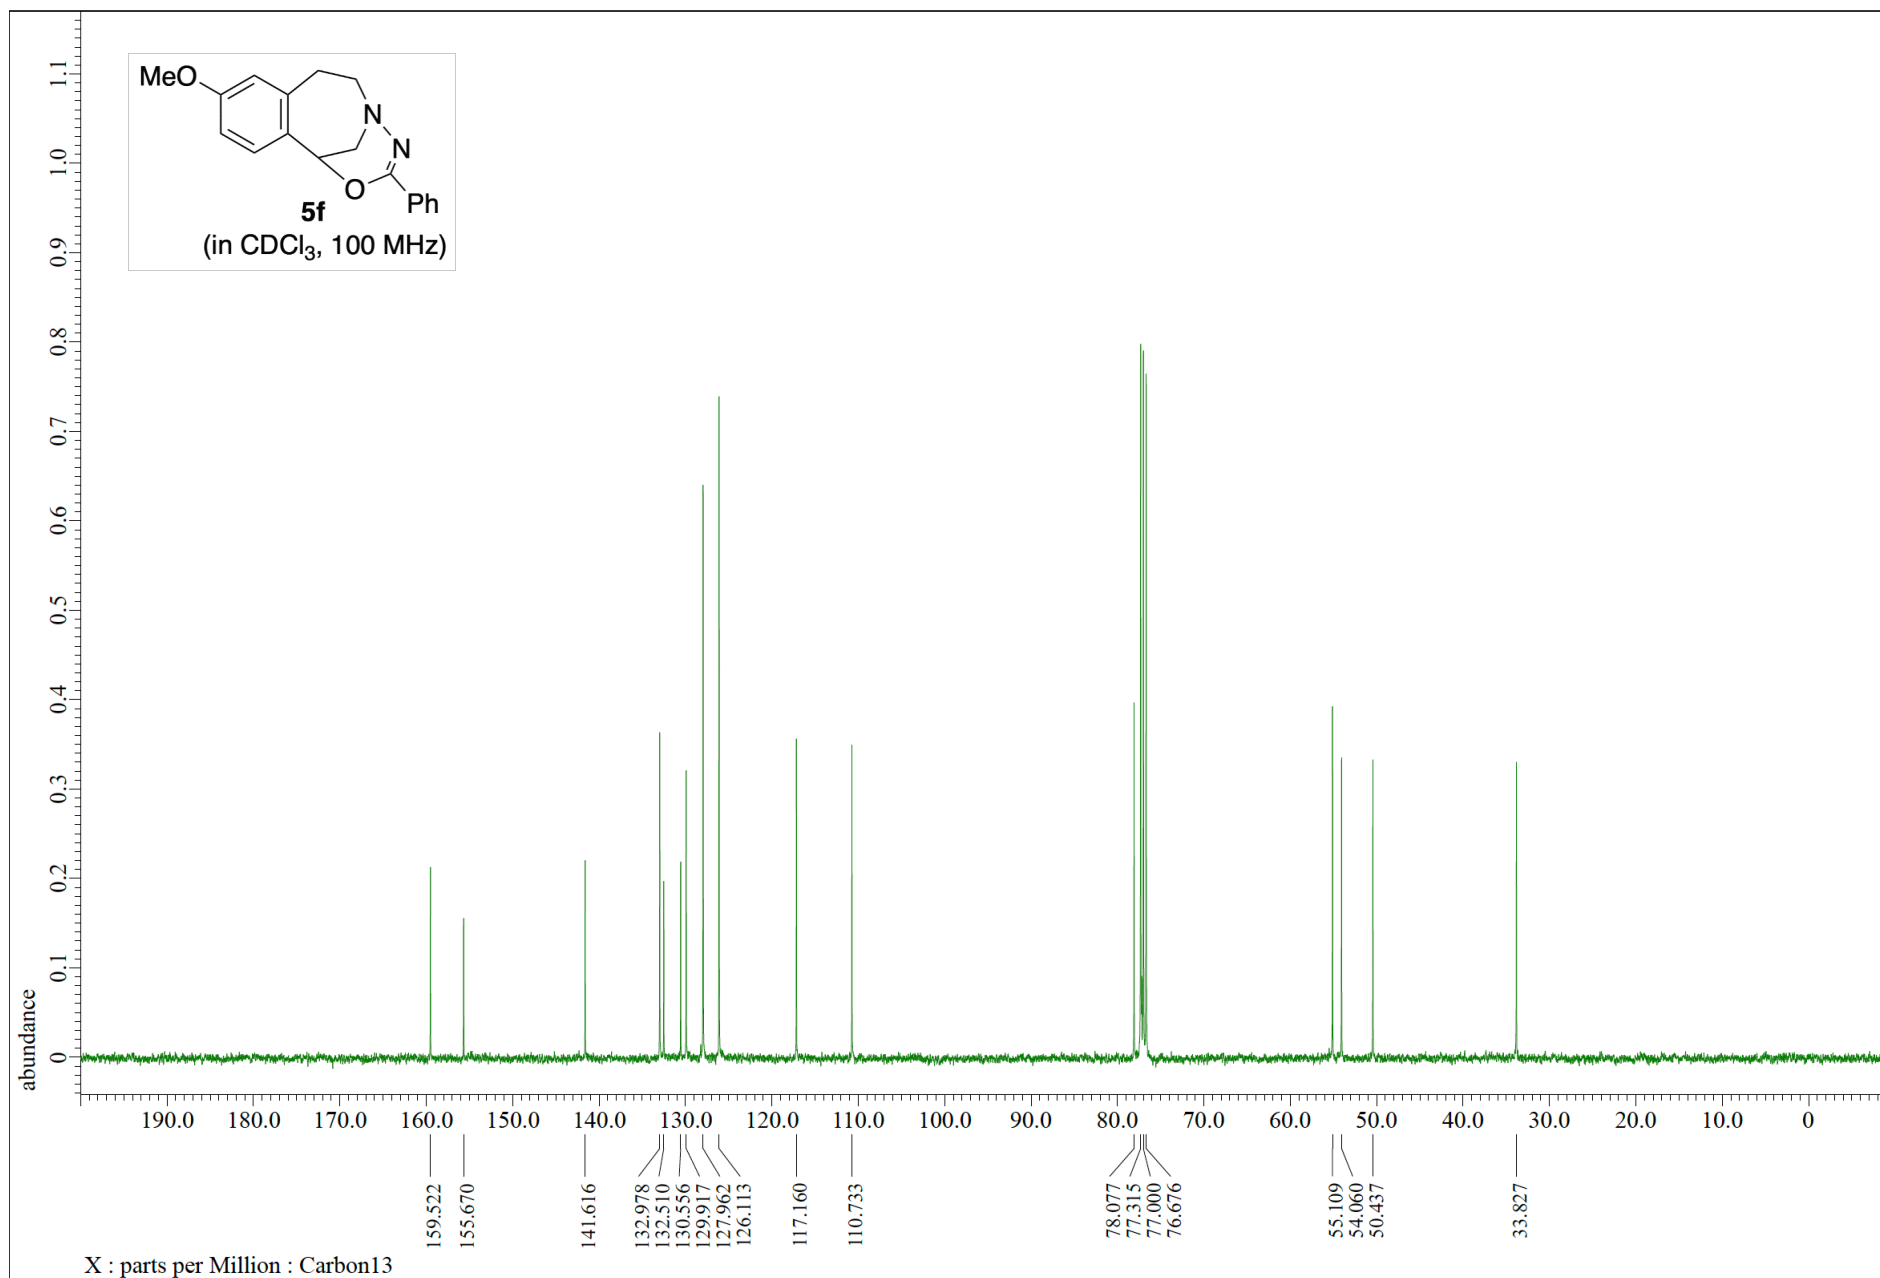

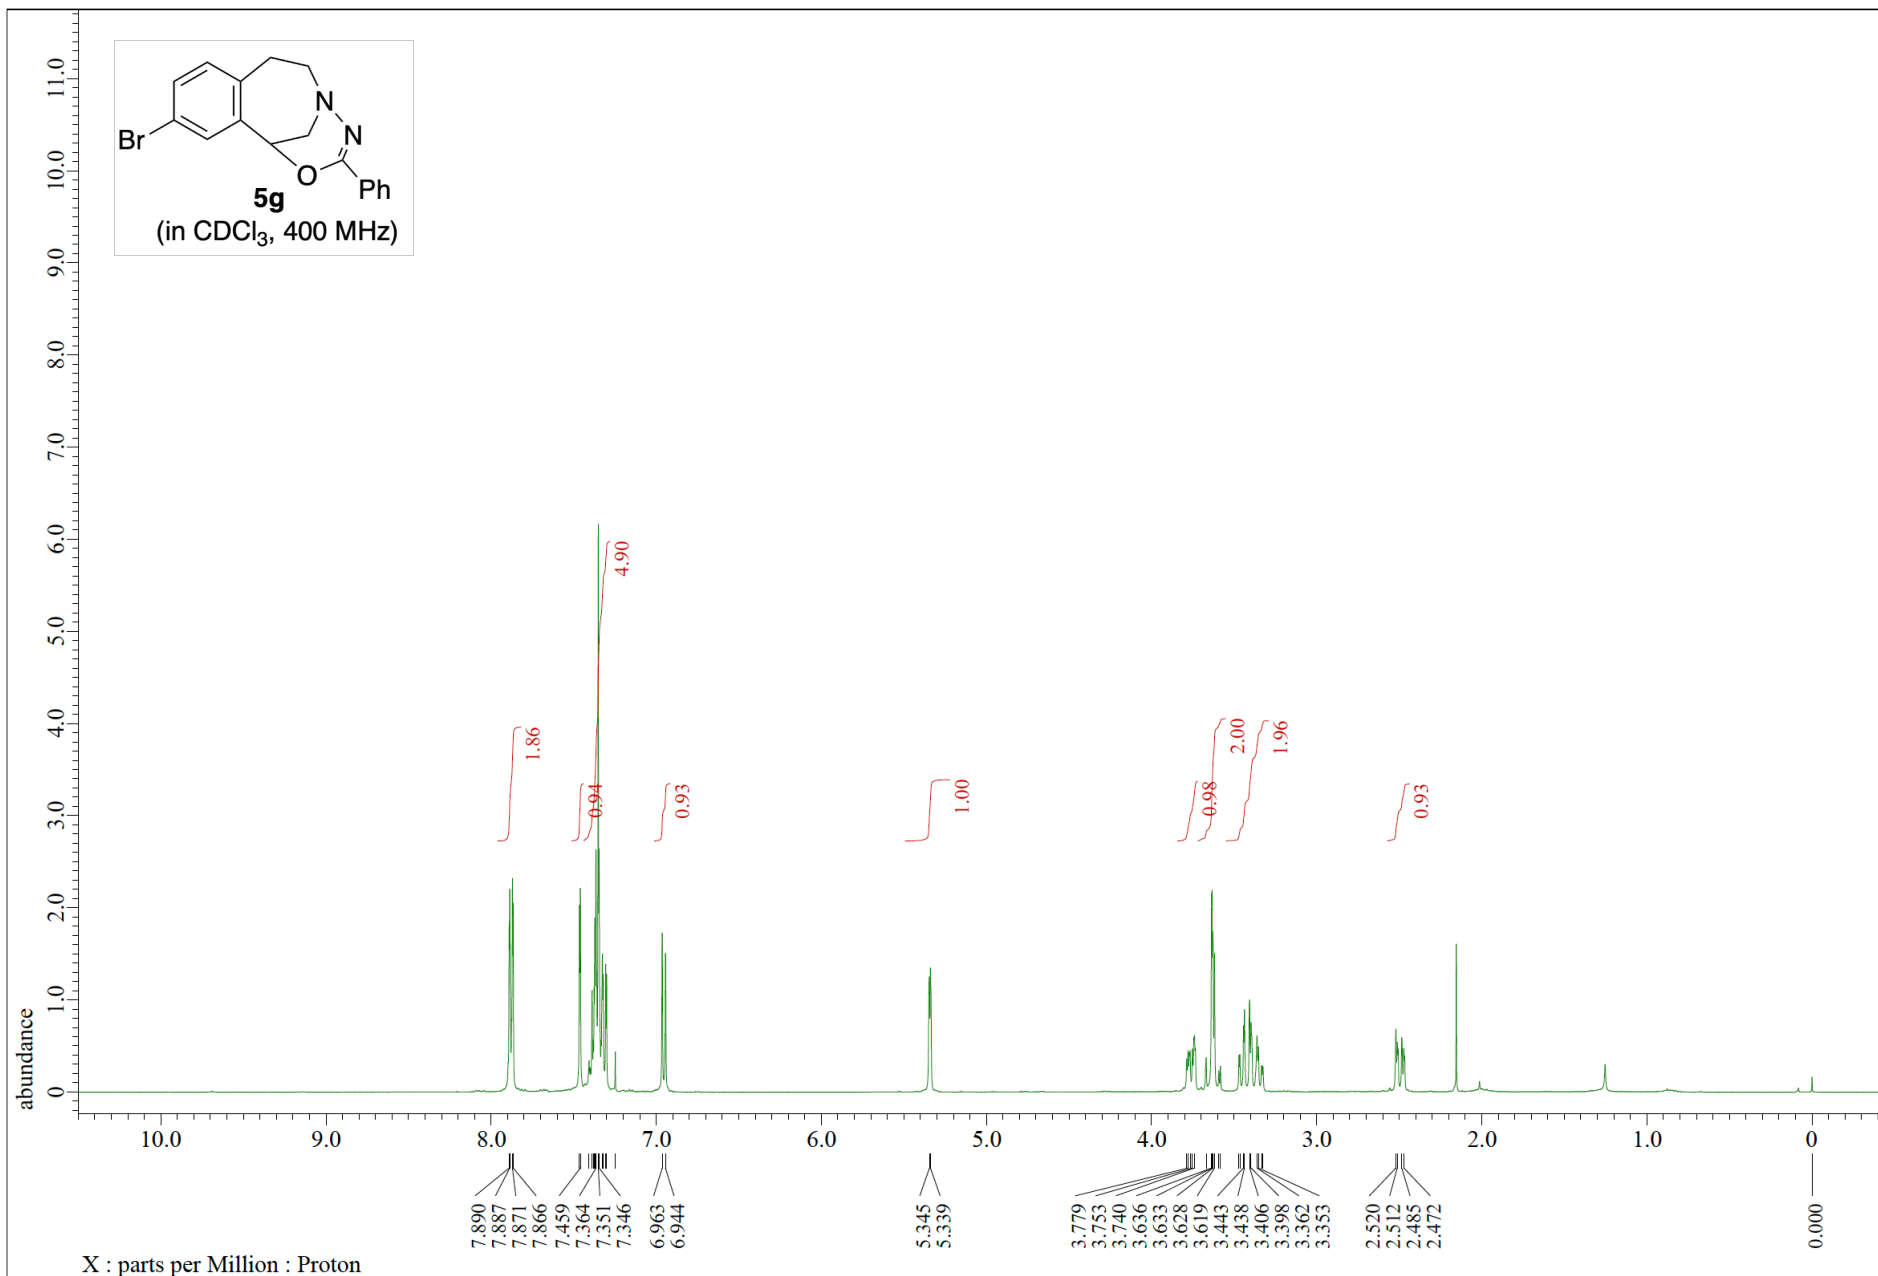

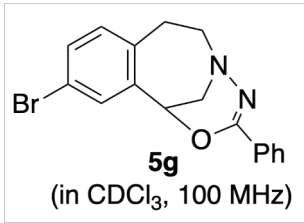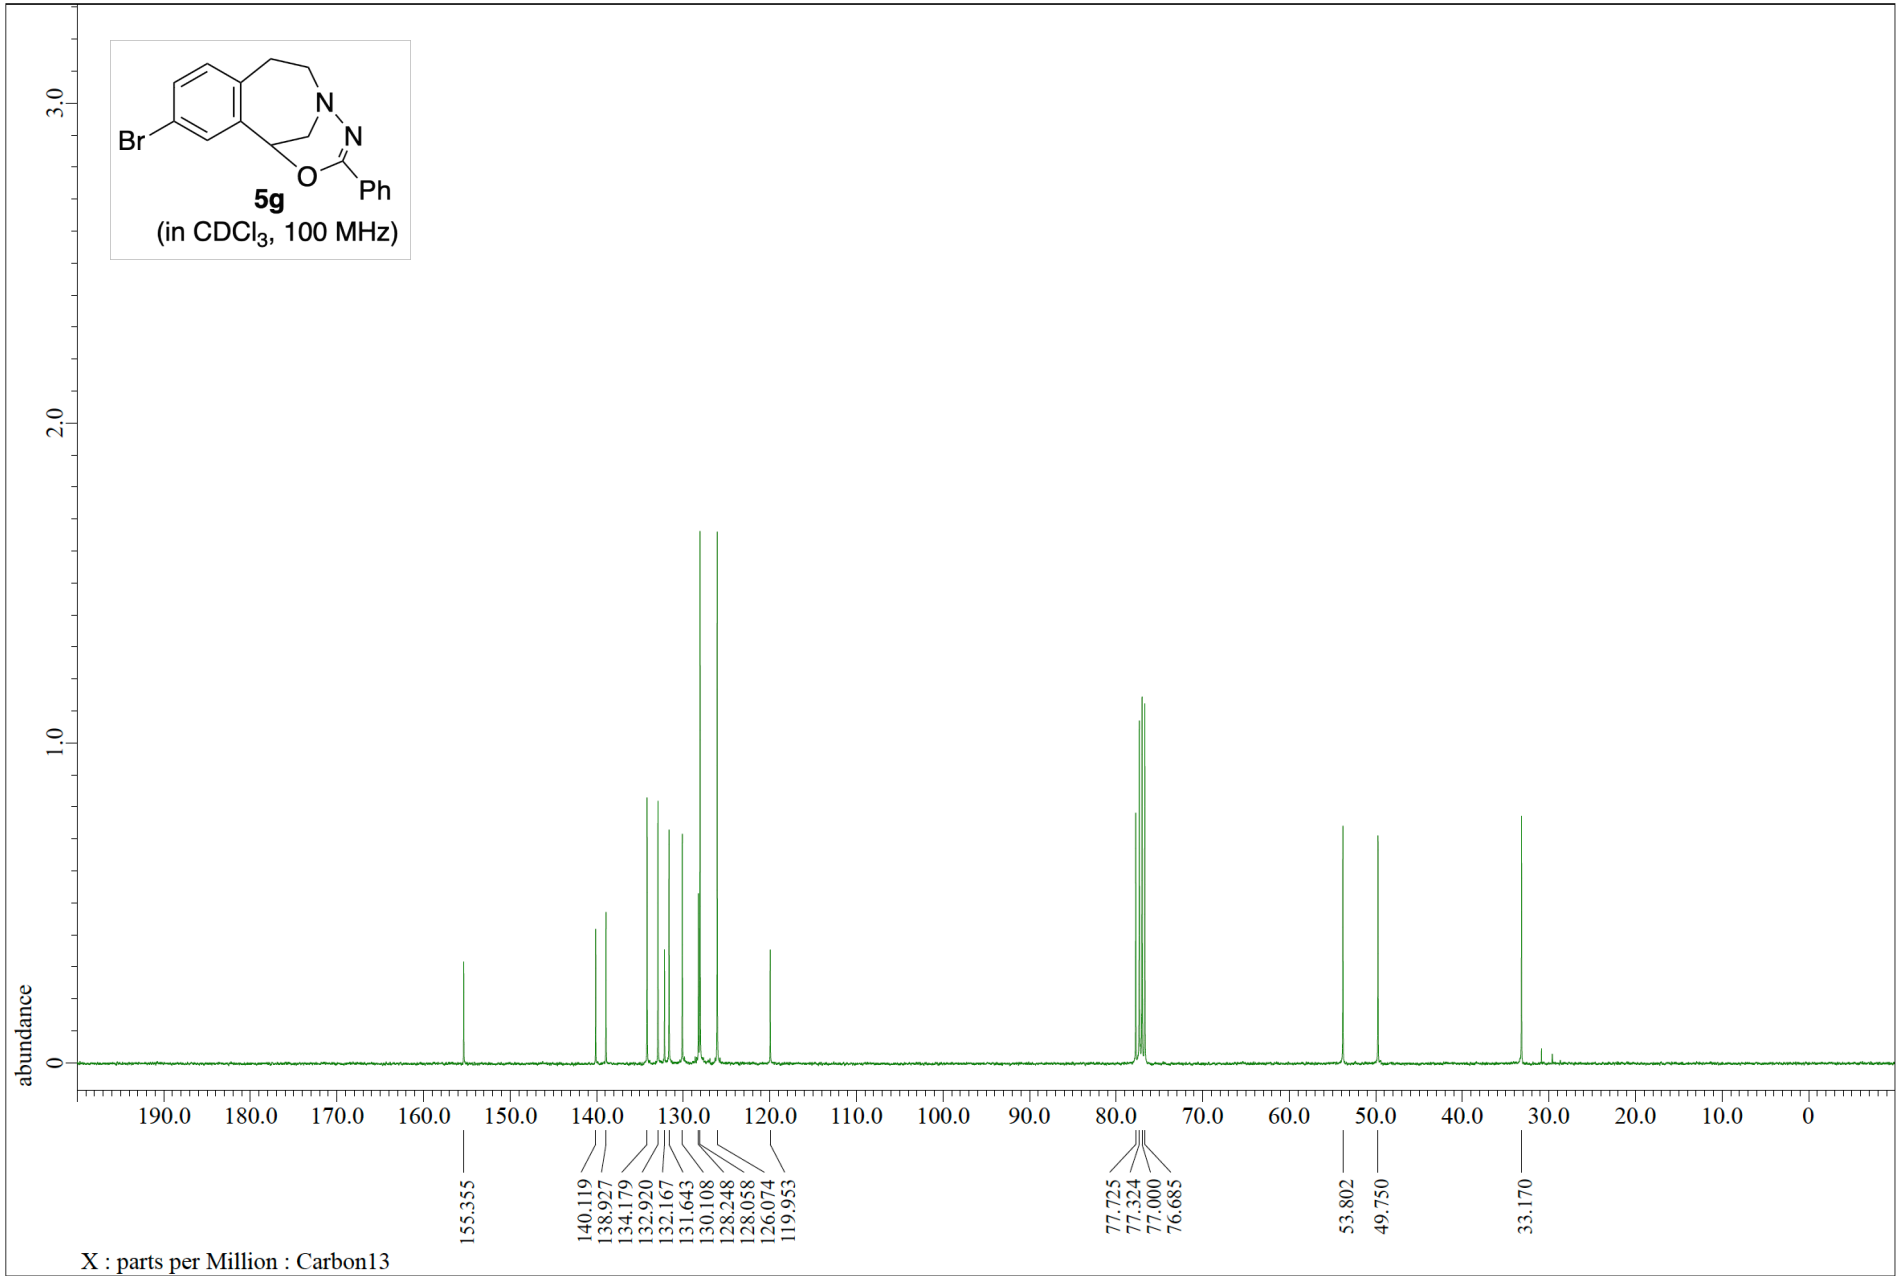

3)  $^1\text{H}$  and  $^{13}\text{C}$  NMR spectra of **6**

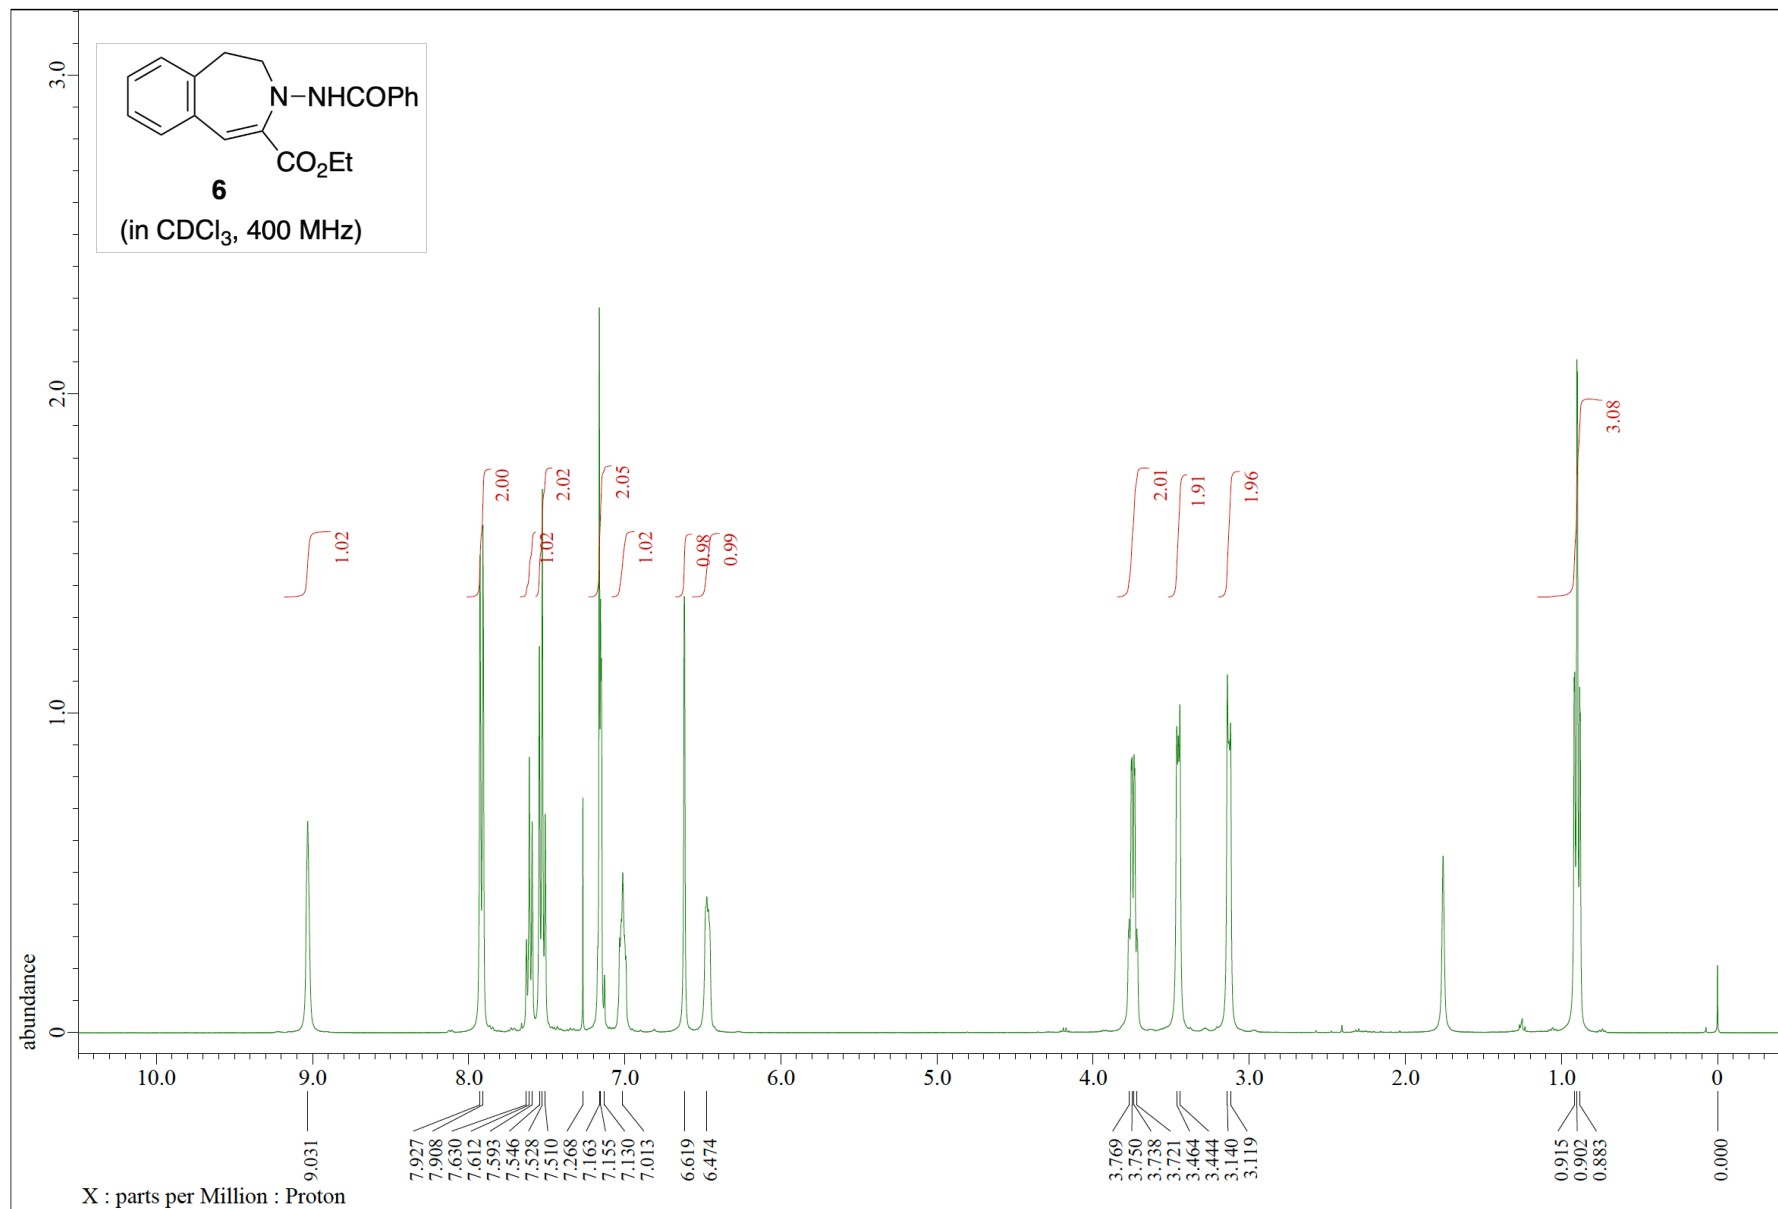

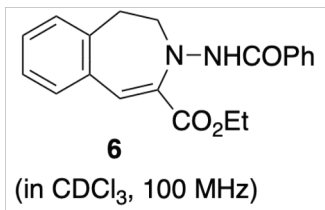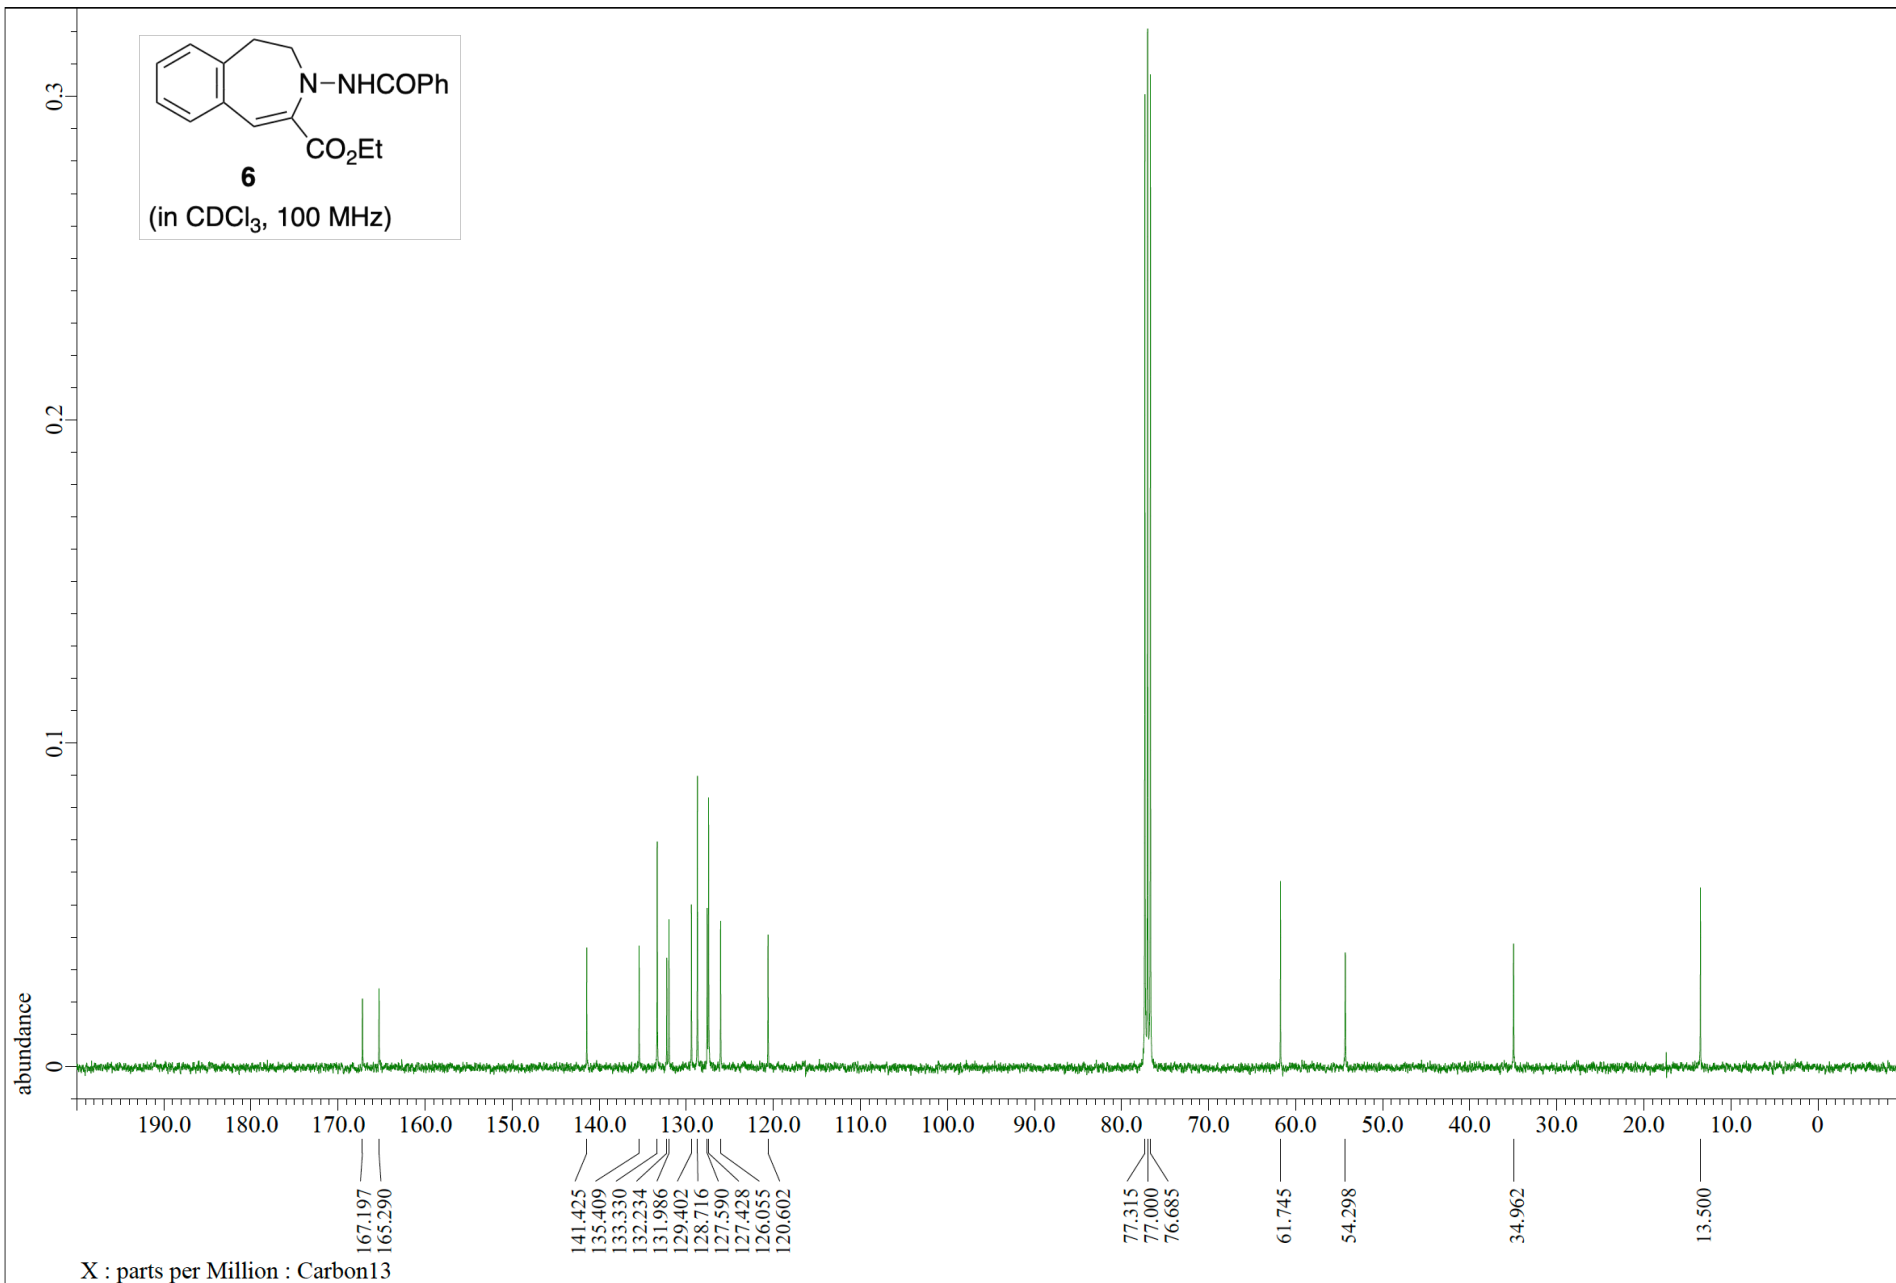

Supplement: d3ob01165h1.pdf [file d3ob01165h1.pdf]
